# Supplementary material for: Pd-Catalyzed tandem C–C/C–O/C–H single bond cleavage of 3-allyloxybenzocyclobutenols
Source: Royal Society of Chemistry journal article supplement (doi:10.1039/d0qo01619e), 2021-01-01

## Supporting Information

### **Pd-catalyzed tandem C–C/C–O/C–H single bond cleavage of 3-allyloxybenzocyclobutenols**

Tian-Mu Tang, Min Liu, Hongli Wu, Ting Gou, Xi Hu, Bi-Qin Wang, Ping Hu, Feijie Song\* and Genping Huang\*

## Table of Contents

|                                                                                     |     |
|-------------------------------------------------------------------------------------|-----|
| I. General information.....                                                         | S3  |
| II. Synthesis and characterization of benzocyclobutenols.....                       | S3  |
| III. Optimization of the reaction of benzocyclobutenol <b>1a</b> .....              | S16 |
| IV. Optimization of the asymmetric synthesis of <b>2a</b> .....                     | S17 |
| V. General procedure for the reactions of benzocyclobutenols.....                   | S22 |
| VI. Characterizations of products <b>2</b> , <b>5</b> and <b>6</b> .....            | S23 |
| VII. Control experiments.....                                                       | S33 |
| VIII. Mechanistic studies by DFT calculations.....                                  | S37 |
| IX. Synthetic applications.....                                                     | S43 |
| X. X-ray data of compounds <b>2f</b> , <b>2g</b> and <b>6b</b> .....                | S47 |
| XI. References.....                                                                 | S50 |
| XII. <sup>1</sup> H and <sup>13</sup> C NMR spectra of the described compounds..... | S52 |

## I. General Information

Unless otherwise mentioned, all reactions were carried out under an inert atmosphere. Unless otherwise noted, all of the reagents were purchased from commercial suppliers and used without further purification. THF was dried by filtration through a Solvent Purification System. Et<sub>2</sub>O and 1,4-dioxane were dried by distillation from sodium and benzophenone and stored in the glove box.

NMR spectra were obtained on a Varian 400 M or 600 M spectrometer. The <sup>1</sup>H NMR (400 MHz or 600 MHz) chemical shifts were measured relative to the residual CDCl<sub>3</sub> as the internal reference (CDCl<sub>3</sub>: δ = 7.26 ppm). The <sup>13</sup>C NMR (101 MHz or 151 MHz) chemical shifts were given using CDCl<sub>3</sub> as the internal standard (CDCl<sub>3</sub>: δ = 77.0 ppm). Coupling constants were reported in Hertz (Hz). Data for <sup>1</sup>H NMR spectra were reported as follows: chemical shift, multiplicity (s = singlet, d = doublet, t = triplet, q = quartet, dd = doublet of doublets, td = triplet of doublets, m = multiplet), coupling constant (Hz), and integration. For characterization of diastereomeric mixtures, \*denotes minor diastereoisomer, +denotes overlap of signals from both diastereoisomers. High-resolution mass spectra (HRMS) were obtained with a Waters Q-TOF Premier or Waters UPLC\_QToF spectrometer. Elemental analysis data was obtained with Elementar UNICUBE. X-Ray single-crystal diffraction data were collected on a Rigaku XtaLAB Synergy diffractometer. Melting points were determined with SGW® X-4 apparatus.

## II. Synthesis and characterization of benzocyclobutenols

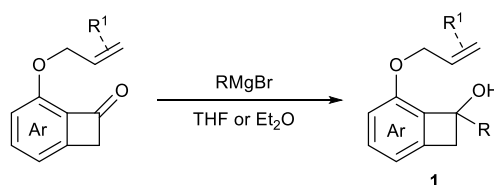

Grignard reagent was added dropwise to a solution of benzocyclobutenone in THF at 0 °C and the resulting solution was stirred at the indicated temperature. After the completion of the reaction as monitored by TLC, the reaction was quenched with water and extracted with EtOAc for three times. The combined organic phases were

washed with brine and dried over anhydrous  $\text{MgSO}_4$ . The solvent was evaporated and the residue was purified by column chromatography on silica gel to afford the desired benzocyclobutenols **1**. Benzocyclobutenols **8**<sup>1</sup> and **11**<sup>2</sup> are known compounds and their characterization data are consistent with those reported in the literature.

Benzocyclobutenones were synthesized through IBX-promoted oxidation of the corresponding secondary benzocyclobutenols,<sup>3</sup> which were prepared according to the procedure reported by Dong.<sup>4</sup> Benzocyclobutenones **SI-1**, and **SI-3** to **SI-11** are known compounds and their characterization data are consistent with those reported in the literature.<sup>4,5</sup>

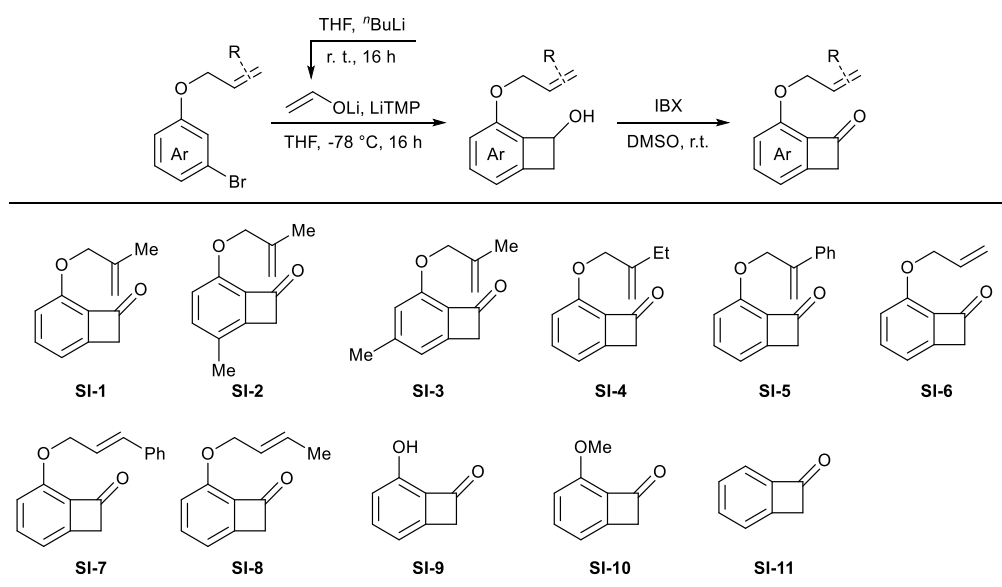

**2-Methyl-5-((2-methylallyl)oxy)bicyclo[4.2.0]octa-1,3,5-trien-7-one (SI-2)**

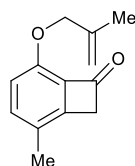

Yellow liquid. <sup>1</sup>H NMR (400 MHz,  $\text{CDCl}_3$ )  $\delta$  7.20 (d,  $J = 8.4$  Hz, 1H), 6.77 (d,  $J = 8.4$  Hz, 1H), 5.04 (s, 1H), 4.92 (s, 1H), 4.79 (s, 2H), 3.80 (s, 2H), 2.24 (s, 3H), 1.82 (s, 3H). <sup>13</sup>C NMR (101 MHz,  $\text{CDCl}_3$ )  $\delta$  184.45, 150.29, 148.51, 140.51, 138.60, 131.55, 124.61, 116.83, 112.33, 75.12, 49.81, 19.20, 16.33.

**7-Ethyl-5-((2-methylallyl)oxy)bicyclo[4.2.0]octa-1,3,5-trien-7-ol (1a)**



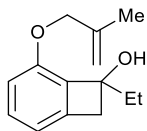

Following the general procedure, benzocyclobutenone **SI-1** (1.88 g, 10.0 mmol), EtMgBr (1.0 M in THF, 15.0 mL, 15.0 mmol) and THF (50.0 mL) were used. The reaction was stirred at room temperature for 3 h. Purification by column chromatography on silica gel (petroleum ether : ethyl acetate = 20 : 1) afforded **1a** as a yellow liquid (1.61 g, 74% yield).  $^1\text{H}$  NMR (400 MHz,  $\text{CDCl}_3$ )  $\delta$  7.20 (dd,  $J = 8.4, 7.2$  Hz, 1H), 6.75 (d,  $J = 7.0$  Hz, 1H), 6.71 (d,  $J = 8.4$  Hz, 1H), 5.09 (s, 1H), 4.96 (s, 1H), 4.53 (d,  $J = 12.7$  Hz, 1H), 4.45 (d,  $J = 12.6$  Hz, 1H), 3.28 (d,  $J = 14.1$  Hz, 1H), 3.03 (d,  $J = 14.1$  Hz, 1H), 2.82 (brs, 1H), 2.07 – 1.97 (m, 1H), 1.95 – 1.86 (m, 1H), 1.82 (s, 3H), 1.03 (t,  $J = 7.4$  Hz, 3H).  $^{13}\text{C}$  NMR (101 MHz,  $\text{CDCl}_3$ )  $\delta$  152.70, 143.19, 140.84, 134.36, 130.58, 116.14, 112.74, 112.28, 80.97, 72.26, 44.92, 32.09, 19.34, 9.22. HRMS ( $\text{ESI}^+$ ) for  $\text{C}_{14}\text{H}_{18}\text{NaO}_2$  [ $\text{M} + \text{Na}$ ] $^+$ : calcd 241.1199; found 241.1207.

#### 7-Methyl-5-((2-methylallyl)oxy)bicyclo[4.2.0]octa-1,3,5-trien-7-ol (**1b**)

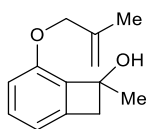

Following the general procedure, benzocyclobutenone **SI-1** (0.19 g, 1.0 mmol),  $\text{CH}_3\text{MgBr}$  (3.0 M in THF, 0.5 mL, 1.5 mmol) and THF (3.0 mL) were used. The reaction was stirred at 0 °C for 1 h. Purification by column chromatography on silica gel (petroleum ether : ethyl acetate = 20 : 1) afforded **1b** as a light yellow liquid (0.09 g, 40% yield).  $^1\text{H}$  NMR (400 MHz,  $\text{CDCl}_3$ )  $\delta$  7.19 (dd,  $J = 7.1, 7.2$  Hz, 1H), 6.74-6.70 (m, 2H), 5.09 (s, 1H), 4.96 (s, 1H), 4.61 (d,  $J = 12.6$  Hz, 1H), 4.52 (d,  $J = 12.6$  Hz, 1H), 3.28 (d,  $J = 14.1$  Hz, 1H), 3.16 (d,  $J = 14.1$  Hz, 1H), 2.73 (s, 1H), 1.83 (s, 3H), 1.72 (s, 3H).  $^{13}\text{C}$  NMR (151 MHz,  $\text{CDCl}_3$ )  $\delta$  152.74, 142.72, 141.03, 134.77, 130.84, 116.27, 113.75, 112.33, 77.76, 72.66, 47.98, 26.52, 19.40. HRMS ( $\text{ESI}^+$ ) for  $\text{C}_{13}\text{H}_{16}\text{NaO}_2$  [ $\text{M} + \text{Na}$ ] $^+$ : calcd 227.1043; found 227.1051.

### 7-Isopropyl-5-((2-methylallyl)oxy)bicyclo[4.2.0]octa-1,3,5-trien-7-ol (**1c**)

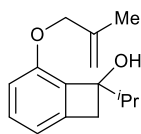

Following the general procedure, benzocyclobutenone **SI-1** (0.19 g, 1.0 mmol), *i*PrMgBr (1.0 M in THF, 1.5 mL, 1.5 mmol) and THF (5.0 mL) were used. The reaction was stirred at room temperature for 2.5 h. Purification by column chromatography on silica gel (petroleum ether : ethyl acetate = 40 : 1) afforded **1c** as a yellow liquid (0.21 g, 90% yield). <sup>1</sup>H NMR (400 MHz, CDCl<sub>3</sub>) δ 7.20 (dd, *J* = 8.3, 7.2 Hz, 1H), 6.76 (d, *J* = 7.1 Hz, 1H), 6.71 (d, *J* = 8.4 Hz, 1H), 5.09 (s, 1H), 4.96 (s, 1H), 4.50 (d, *J* = 12.7 Hz, 1H), 4.45 (d, *J* = 12.7 Hz, 1H), 3.31 (d, *J* = 14.1 Hz, 1H), 2.93 (d, *J* = 14.1 Hz, 1H), 2.50 (s, 1H), 2.19 – 2.09 (m, 1H), 1.82 (s, 3H), 1.14 (d, *J* = 6.7 Hz, 3H), 0.96 (d, *J* = 6.9 Hz, 3H). <sup>13</sup>C NMR (151 MHz, CDCl<sub>3</sub>) δ 152.61, 143.74, 140.83, 134.73, 130.51, 116.20, 112.33, 111.89, 84.16, 72.01, 42.95, 35.55, 19.38, 17.87, 17.66. HRMS (ESI<sup>+</sup>) for C<sub>15</sub>H<sub>20</sub>NaO<sub>2</sub> [M + Na]<sup>+</sup>: calcd 255.1356; found 255.1348.

### 7-Cyclopropyl-5-((2-methylallyl)oxy)bicyclo[4.2.0]octa-1,3,5-trien-7-ol (**1d**)

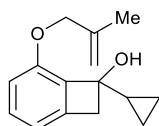

Following the general procedure, benzocyclobutenone **SI-1** (0.19 g, 1.0 mmol), cyclopropylmagnesium bromide (1.0 M in THF, 1.5 mL, 1.5 mmol) and THF (5.0 mL) were used. The reaction was stirred at room temperature for 2 h. Purification by column chromatography on silica gel (petroleum ether : ethyl acetate = 20 : 1) afforded **1d** as a yellow liquid (0.11 g, 47% yield). <sup>1</sup>H NMR (400 MHz, CDCl<sub>3</sub>) δ 7.18 (dd, *J* = 8.3, 7.3 Hz, 1H), 6.74 (d, *J* = 7.2 Hz, 1H), 6.69 (d, *J* = 8.4 Hz, 1H), 5.08 (s, 1H), 4.96 (s, 1H), 4.51 (s, 2H), 3.26 (d, *J* = 14.0 Hz, 1H), 3.08 (d, *J* = 13.9 Hz, 1H), 2.67 (brs, 1H), 1.83 (s, 3H), 1.47 – 1.40 (m, 1H), 0.74 – 0.67 (m, 1H), 0.56 – 0.47 (m, 2H), 0.29 – 0.22 (m, 1H). <sup>13</sup>C NMR (151 MHz, CDCl<sub>3</sub>) δ 152.60, 143.66, 140.86,

133.11, 130.69, 116.14, 112.34, 112.21, 81.39, 72.17, 45.18, 19.38, 18.95, 2.32, 2.16.

HRMS (ESI<sup>+</sup>) for C<sub>15</sub>H<sub>18</sub>NaO<sub>2</sub> [M + Na]<sup>+</sup>: calcd 253.1199; found 253.1206.

### 7-Benzyl-5-((2-methylallyl)oxy)bicyclo[4.2.0]octa-1,3,5-trien-7-ol (**1e**)

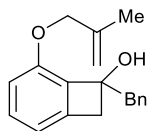

Following the general procedure, benzocyclobutenone **SI-1** (0.38 g, 2.0 mmol), benzylmagnesium bromide (1.0 M in THF, 3.0 mL, 3.0 mmol) and THF (7.0 mL) were used. The reaction was stirred at 0 °C for 1 h. Purification by column chromatography on silica gel (petroleum ether : ethyl acetate = 40 : 1) afforded **1e** as a yellow liquid (0.28 g, 50% yield). <sup>1</sup>H NMR (400 MHz, CDCl<sub>3</sub>) δ 7.34-7.32 (m, 4H), 7.31-7.27 (m, 1H), 7.24 (dd, *J* = 8.4, 7.1 Hz, 1H), 6.79 (d, *J* = 8.4 Hz, 1H), 6.74 (d, *J* = 7.1 Hz, 1H), 5.12 (s, 1H), 5.01 (s, 1H), 4.58 (d, *J* = 12.8 Hz, 1H), 4.48 (d, *J* = 12.9 Hz, 1H), 3.44 (d, *J* = 14.1 Hz, 1H), 3.37 (d, *J* = 13.7 Hz, 1H), 3.24 (d, *J* = 13.7 Hz, 1H), 3.03 (d, *J* = 14.1 Hz, 1H), 2.81 (s, 1H), 1.86 (s, 3H). <sup>13</sup>C NMR (101 MHz, CDCl<sub>3</sub>) δ 152.88, 142.66, 140.92, 137.31, 134.26, 130.85, 130.04, 128.06, 126.47, 116.15, 113.15, 112.21, 79.79, 72.51, 45.30, 44.92, 19.33. HRMS (ESI<sup>+</sup>) for C<sub>19</sub>H<sub>20</sub>NaO<sub>2</sub> [M + Na]<sup>+</sup>: calcd 303.1356; found 303.1355.

### 7-Ethyl-2-methyl-5-((2-methylallyl)oxy)bicyclo[4.2.0]octa-1,3,5-trien-7-ol (**1f**)

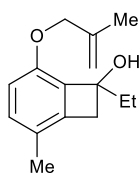

Following the general procedure, benzocyclobutenone **SI-2** (0.61 g, 3.0 mmol), EtMgBr (2.0 M in THF, 2.3 mL, 4.5 mmol) and THF (9.0 mL) were used. The reaction was stirred at room temperature for 3 h. Purification by column chromatography on silica gel (petroleum ether : ethyl acetate = 40 : 1) afforded **1f** as a colorless liquid (0.31 g, 44% yield). <sup>1</sup>H NMR (400 MHz, CDCl<sub>3</sub>) δ 6.98 (d, *J* = 8.4 Hz, 1H), 6.64 (d, *J* = 8.4 Hz, 1H), 5.07 (s, 1H), 4.95 (s, 1H), 4.51 (d, *J* = 12.7 Hz, 1H),

4.45 (d,  $J = 12.7$  Hz, 1H), 3.23 (d,  $J = 13.9$  Hz, 1H), 2.96 (d,  $J = 13.9$  Hz, 1H), 2.51 (brs, 1H), 2.13 (s, 3H), 2.07 – 1.97 (m, 1H), 1.95 – 1.86 (m, 1H), 1.81 (s, 3H), 1.04 (t,  $J = 7.4$  Hz, 3H).  $^{13}\text{C}$  NMR (101 MHz,  $\text{CDCl}_3$ )  $\delta$  150.64, 141.34, 140.94, 133.80, 130.81, 125.48, 113.33, 112.01, 80.09, 72.30, 43.60, 32.09, 19.23, 15.68, 9.16. HRMS (ESI<sup>+</sup>) for  $\text{C}_{15}\text{H}_{20}\text{NaO}_2$  [ $\text{M} + \text{Na}$ ]<sup>+</sup>: calcd 255.1356; found 255.1347.

### 7-Ethyl-3-methyl-5-((2-methylallyl)oxy)bicyclo[4.2.0]octa-1,3,5-trien-7-ol (**1g**)

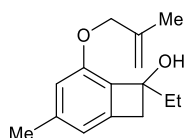

Following the general procedure, benzocyclobutenone **SI-3** (0.22 g, 1.1 mmol),  $\text{EtMgBr}$  (2.0 M in THF, 0.9 mL, 1.8 mmol) and THF (3.6 mL) were used. The reaction was stirred at room temperature for 3 h. Purification by column chromatography on silica gel (petroleum ether : ethyl acetate = 40 : 1) afforded **1g** as a colorless liquid (0.21 g, 82% yield).  $^1\text{H}$  NMR (400 MHz,  $\text{CDCl}_3$ )  $\delta$  6.60 (s, 1H), 6.56 (s, 1H), 5.10 (s, 1H), 4.96 (s, 1H), 4.55 (d,  $J = 12.6$  Hz, 1H), 4.46 (d,  $J = 12.6$  Hz, 1H), 3.26 (d,  $J = 14.1$  Hz, 1H), 3.00 (d,  $J = 14.1$  Hz, 1H), 2.77 (brs, 1H), 2.33 (s, 3H), 2.06 – 1.97 (m, 1H), 1.95 – 1.86 (m, 1H), 1.83 (s, 3H), 1.03 (t,  $J = 7.4$  Hz, 3H).  $^{13}\text{C}$  NMR (101 MHz,  $\text{CDCl}_3$ )  $\delta$  152.69, 143.05, 141.03, 140.99, 131.19, 116.86, 113.84, 112.13, 80.64, 72.43, 44.71, 32.22, 21.97, 19.35, 9.26. HRMS (ESI<sup>+</sup>) for  $\text{C}_{15}\text{H}_{20}\text{NaO}_2$  [ $\text{M} + \text{Na}$ ]<sup>+</sup>: calcd 255.1356; found 255.1349.

### 7-Ethyl-5-(2-methylenebutoxy)bicyclo[4.2.0]octa-1,3,5-trien-7-ol (**1h**)

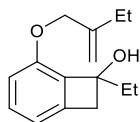

Following the general procedure, benzocyclobutenone **SI-4** (2.02 g, 10.0 mmol),  $\text{EtMgBr}$  (2.0 M in THF, 7.5 mL, 15 mmol) and THF (30.0 mL) were used. The reaction was stirred at room temperature for 1.5 h. Purification by column chromatography on silica gel (petroleum ether : ethyl acetate = 10 : 1) afforded **1h** as a light yellow liquid (1.71 g, 73% yield).  $^1\text{H}$  NMR (400 MHz,  $\text{CDCl}_3$ )  $\delta$  7.20 (dd,  $J =$

7.8 Hz, 7.8 Hz, 1H), 6.78 – 6.68 (m, 2H), 5.12 (s, 1H), 4.97 (s, 1H), 4.59 (d,  $J = 12.5$  Hz, 1H), 4.51 (d,  $J = 12.5$  Hz, 1H), 3.29 (d,  $J = 14.1$  Hz, 1H), 3.04 (d,  $J = 14.1$  Hz, 1H), 2.73 (brs, 1H), 2.16 (q,  $J = 7.4$  Hz, 2H), 2.10 – 1.84 (m, 2H), 1.11 (t,  $J = 7.4$  Hz, 3H), 1.03 (t,  $J = 7.4$  Hz, 3H).  $^{13}\text{C}$  NMR (151 MHz,  $\text{CDCl}_3$ )  $\delta$  152.86, 146.46, 143.21, 134.41, 130.64, 116.13, 112.82, 110.40, 81.05, 71.62, 45.00, 32.15, 25.77, 11.92, 9.23. HRMS ( $\text{ESI}^+$ ) for  $\text{C}_{15}\text{H}_{20}\text{NaO}_2$  [ $\text{M} + \text{Na}$ ] $^+$ : calcd 255.1356; found 255.1358.

### 7-Ethyl-5-((2-phenylallyl)oxy)bicyclo[4.2.0]octa-1,3,5-trien-7-ol (**1i**)

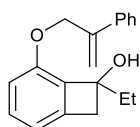

Following the general procedure, benzocyclobutenone **SI-5** (0.83 g, 3.3 mmol),  $\text{EtMgBr}$  (1.0 M in THF, 5.0 mL, 5.0 mmol) and THF (10.0 mL) were used. The reaction was stirred at  $-20$  °C for 12 h. Purification by column chromatography on silica gel (petroleum ether : ethyl acetate = 20 : 1) afforded **1i** as a yellow liquid (0.80 g, 86% yield).  $^1\text{H}$  NMR (400 MHz,  $\text{CDCl}_3$ )  $\delta$  7.48 (d,  $J = 8.0$  Hz, 2H), 7.40 – 7.28 (m, 3H), 7.22 (t,  $J = 7.8$  Hz, 1H), 6.78 (d,  $J = 7.8$  Hz, 2H), 5.59 (s, 1H), 5.48 (s, 1H), 5.07 (d,  $J = 12.9$  Hz, 1H), 4.96 (d,  $J = 12.8$  Hz, 1H), 3.32 (d,  $J = 14.1$  Hz, 1H), 3.06 (d,  $J = 14.1$  Hz, 1H), 2.35 (brs, 1H), 2.06 – 1.97 (m, 1H), 1.94 – 1.85 (m, 1H), 0.98 (t,  $J = 7.4$  Hz, 3H).  $^{13}\text{C}$  NMR (151 MHz,  $\text{CDCl}_3$ )  $\delta$  152.70, 143.26, 143.21, 138.32, 134.49, 130.76, 128.43, 127.93, 126.01, 116.43, 114.33, 113.30, 81.17, 70.60, 45.08, 32.23, 9.20. HRMS ( $\text{ESI}^+$ ) for  $\text{C}_{19}\text{H}_{20}\text{NaO}_2$  [ $\text{M} + \text{Na}$ ] $^+$ : calcd 303.1356; found 303.1360.

### 7-Methyl-5-((2-phenylallyl)oxy)bicyclo[4.2.0]octa-1,3,5-trien-7-ol (**1j**)

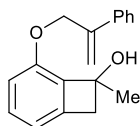

Following the general procedure, benzocyclobutenone **SI-5** (0.50 g, 2.0 mmol),  $\text{MeMgBr}$  (3.0 M in 2-MeTHF, 1.0 mL, 3.0 mmol) and THF (6.0 mL) were used. The reaction was stirred at  $0$  °C for 2 h. Purification by column chromatography on silica

gel (petroleum ether : dichloromethane = 2 : 3) afforded **1j** as a yellow liquid (0.22 g, 41% yield). <sup>1</sup>H NMR (600 MHz, CDCl<sub>3</sub>) δ 7.50 (d, *J* = 7.6 Hz, 2H), 7.36 (t, *J* = 7.5 Hz, 2H), 7.32 (d, *J* = 7.2 Hz, 1H), 7.25 – 7.21 (m, 1H), 6.81 – 6.75 (m, 2H), 5.61 (s, 1H), 5.49 (s, 1H), 5.14 (d, *J* = 12.8 Hz, 1H), 5.01 (d, *J* = 12.8 Hz, 1H), 3.32 (d, *J* = 14.0 Hz, 1H), 3.20 (d, *J* = 14.0 Hz, 1H), 2.44 (brs, 1H), 1.73 (s, 3H). <sup>13</sup>C NMR (151 MHz, CDCl<sub>3</sub>) δ 152.58, 143.21, 142.75, 138.28, 134.86, 130.89, 128.46, 127.95, 125.98, 116.49, 114.32, 114.14, 77.85, 70.86, 48.04, 26.72. HRMS (ESI<sup>+</sup>) for C<sub>18</sub>H<sub>18</sub>NaO<sub>2</sub> [M + Na]<sup>+</sup>: calcd 289.1199; found 289.1202.

#### 5-(Allyloxy)-7-ethylbicyclo[4.2.0]octa-1,3,5-trien-7-ol (**1k**)

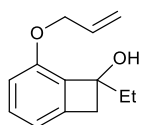

Following the general procedure, benzocyclobutenone **SI-6** (0.10 g, 0.6 mmol), EtMgBr (2.0 M in THF, 0.5 mL, 1.0 mmol) and THF (2.5 mL) were used. The reaction was stirred at 0 °C for 2 h. Purification by column chromatography on silica gel (petroleum ether : ethyl acetate = 20 : 1) afforded **1k** as a yellow liquid (0.10 g, 82% yield). δ 7.20 (dd, *J* = 8.3, 7.2 Hz, 1H), 6.75 (d, *J* = 7.1 Hz, 1H), 6.72 (d, *J* = 8.4 Hz, 1H), 6.08 – 5.99 (m, 1H), 5.43 – 5.38 (m, 1H), 5.27 – 5.24 (m, 1H), 4.68 – 4.56 (m, 2H), 3.30 (d, *J* = 14.1 Hz, 1H), 3.04 (d, *J* = 14.1 Hz, 1H), 2.60 (brs, 1H), 2.08 – 1.99 (m, 1H), 1.95 – 1.86 (m, 1H), 1.02 (t, *J* = 7.4 Hz, 3H). <sup>13</sup>C NMR (151 MHz, CDCl<sub>3</sub>) δ 152.72, 143.23, 134.39, 133.37, 130.72, 117.19, 116.26, 113.09, 81.11, 69.65, 45.08, 32.20, 9.23. HRMS (ESI<sup>+</sup>) for C<sub>13</sub>H<sub>16</sub>NaO<sub>2</sub> [M + Na]<sup>+</sup>: calcd 227.1043; found 227.1050.

#### 5-(Cinnamyloxy)-7-ethylbicyclo[4.2.0]octa-1,3,5-trien-7-ol (**1l**)

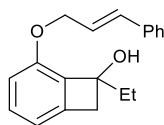

Then following the general procedure, compound **SI-7** (0.13 g, 0.5 mmol), EtMgBr (2.0 M in THF, 0.4 mL, 0.8 mmol) and THF (3.0 mL) were used. The reaction was

stirred at -20 °C for 2 h. Purification by column chromatography on neutral aluminum oxide (petroleum ether : ethyl acetate = 20 : 1) afforded **1l** as a light yellow liquid (0.10 g, 72% yield). <sup>1</sup>H NMR (400 MHz, CDCl<sub>3</sub>) δ 7.41 (d, *J* = 7.5 Hz, 2H), 7.33 (dd, *J* = 7.5 Hz, 2H), 7.28 – 7.21 (m, 2H), 6.79 – 6.71 (m, 3H), 6.44 – 6.37 (m, 1H), 4.86 – 4.75 (m, 2H), 3.33 (d, *J* = 14.1 Hz, 1H), 3.07 (d, *J* = 14.1 Hz, 1H), 2.49 (brs, 1H), 2.12 – 2.03 (m, 1H), 1.99 – 1.90 (m, 1H), 1.05 (t, *J* = 7.4 Hz, 3H). <sup>13</sup>C NMR (151 MHz, CDCl<sub>3</sub>) δ 152.79, 143.26, 136.43, 134.37, 132.61, 130.81, 128.54, 127.81, 126.52, 124.62, 116.32, 113.28, 81.18, 69.62, 45.14, 32.25, 9.29.

**(E)-5-(But-2-en-1-yloxy)-7-ethylbicyclo[4.2.0]octa-1,3,5-trien-7-ol (1m)**

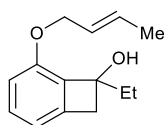

Following the general procedure, benzocyclobutenone **SI-8** (0.56 g, 3.0 mmol), EtMgBr (1.0 M in THF, 4.5 mL, 4.5 mmol) and THF (15.0 mL) were used. The reaction was stirred at room temperature for 1.5 h. Purification by column chromatography on silica gel (petroleum ether : ethyl acetate = 20 : 1) afforded **1m** as a yellow liquid (0.40 g, 61% yield). <sup>1</sup>H NMR (400 MHz, CDCl<sub>3</sub>) δ 7.19 (dd, *J* = 8.4, 7.2 Hz, 1H), 6.74 (d, *J* = 7.1 Hz, 1H), 6.71 (d, *J* = 8.4 Hz, 1H), 5.89 – 5.79 (m, 1H), 5.73 – 5.66 (m, 1H), 4.60 – 4.56 (m, 1H), 4.54 – 4.49 (m, 1H), 3.30 (d, *J* = 14.1 Hz, 1H), 3.04 (d, *J* = 14.1 Hz, 1H), 2.49 (brs, 1H), 2.08 – 1.99 (m, 1H), 1.95 – 1.86 (m, 1H), 1.75 (dd, *J* = 6.4, 1.2 Hz, 3H), 1.02 (t, *J* = 7.4 Hz, 3H). <sup>13</sup>C NMR (101 MHz, CDCl<sub>3</sub>) δ 152.90, 143.19, 134.32, 130.71, 130.12, 126.22, 116.07, 113.23, 81.15, 69.75, 45.05, 32.24, 17.83, 9.24. HRMS (ESI<sup>+</sup>) for C<sub>14</sub>H<sub>18</sub>NaO<sub>2</sub> [M + Na]<sup>+</sup>: calcd 241.1199; found 241.1205.

**(E)-7-Benzyl-5-(but-2-en-1-yloxy)bicyclo[4.2.0]octa-1,3,5-trien-7-ol (1n)**

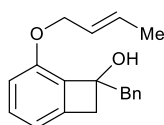

Following the general procedure, benzocyclobutenone **SI-8** (0.38 g, 2.0 mmol),

benzylmagnesium bromide (1.0 M in THF, 3.0 mL, 3.0 mmol) and THF (10.0 mL) were used. The reaction was stirred at room temperature for 1 h. Purification by column chromatography on silica gel (petroleum ether : ethyl acetate = 20 : 1) afforded **1n** as a yellow liquid (0.67 g, >99% yield). <sup>1</sup>H NMR (400 MHz, CDCl<sub>3</sub>) δ 7.33 – 7.22 (m, 6H), 6.78 (d, *J* = 8.4 Hz, 1H), 6.74 (d, *J* = 7.1 Hz, 1H), 5.91 – 5.82 (m, 1H), 5.76 – 5.69 (m, 1H), 4.60 (dd, *J* = 11.6, 5.8 Hz, 1H), 4.52 (dd, *J* = 11.7, 6.1 Hz, 1H), 3.43 (d, *J* = 14.1 Hz, 1H), 3.36 (d, *J* = 13.7 Hz, 1H), 3.24 (d, *J* = 13.7 Hz, 1H), 3.03 (d, *J* = 14.1 Hz, 1H), 2.99 (brs, 1H), 1.81 (d, *J* = 6.3 Hz, 3H). <sup>13</sup>C NMR (151 MHz, CDCl<sub>3</sub>) δ 152.77, 142.64, 137.35, 134.26, 130.77, 130.05, 130.02, 127.97, 126.36, 126.18, 115.98, 113.08, 79.81, 69.70, 45.36, 44.79, 17.74. HRMS (ESI<sup>+</sup>) for C<sub>19</sub>H<sub>20</sub>NaO<sub>2</sub> [M + Na]<sup>+</sup>: calcd 303.1356; found 303.1360.

**(E)-5-(But-2-en-1-yloxy)-7-isopropylbicyclo[4.2.0]octa-1,3,5-trien-7-ol (1o)**

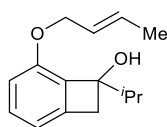

Following the general procedure, benzocyclobutenone **SI-8** (0.38 g, 2.0 mmol), <sup>i</sup>PrMgBr (1.0 M in THF, 3.0 mL, 3.0 mmol) and THF (10.0 mL) were used. The reaction was stirred at room temperature for 1 h. Purification by column chromatography on silica gel (petroleum ether : ethyl acetate = 20 : 1) afforded **1o** as a yellow liquid (0.34 g, 72% yield). <sup>1</sup>H NMR (400 MHz, CDCl<sub>3</sub>) δ 7.19 (dd, *J* = 8.4, 7.2 Hz, 1H), 6.74 (d, *J* = 7.1 Hz, 1H), 6.70 (d, *J* = 8.4 Hz, 1H), 5.87 – 5.78 (m, 1H), 5.72 – 5.64 (m, 1H), 4.55 – 4.46 (m, 2H), 3.30 (d, *J* = 14.1 Hz, 1H), 2.92 (d, *J* = 14.1 Hz, 1H), 2.61 (s, 1H), 2.19 – 2.09 (m, 1H), 1.74 (dd, *J* = 6.4, 1.3 Hz, 3H), 1.12 (d, *J* = 6.7 Hz, 3H), 0.92 (d, *J* = 6.9 Hz, 3H). <sup>13</sup>C NMR (151 MHz, CDCl<sub>3</sub>) δ 152.70, 143.69, 134.63, 130.53, 129.93, 126.17, 116.06, 112.33, 84.18, 69.33, 42.78, 35.55, 17.93, 17.83, 17.64. HRMS (ESI<sup>+</sup>) for C<sub>15</sub>H<sub>20</sub>NaO<sub>2</sub> [M + Na]<sup>+</sup>: calcd 255.1356; found 255.1354.

**(E)-5-(But-2-en-1-yloxy)-7-cyclopropylbicyclo[4.2.0]octa-1,3,5-trien-7-ol (1p)**



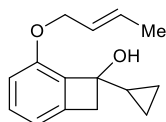

Following the general procedure, benzocyclobutenone **SI-8** (0.38 g, 2.0 mmol), cyclopropylmagnesium bromide (1.0 M in THF, 3.0 mL, 3.0 mmol) and THF (10.0 mL) were used. The reaction was stirred at 0 °C for 1 h. Purification by column chromatography on silica gel (petroleum ether : ethyl acetate = 8 : 1) afforded **1p** as a yellow liquid (0.39 g, 84% yield). <sup>1</sup>H NMR (400 MHz, CDCl<sub>3</sub>) δ 7.18 (t, *J* = 7.8 Hz, 1H), 6.72 (d, *J* = 7.1 Hz, 1H), 6.68 (d, *J* = 8.4 Hz, 1H), 5.88 – 5.79 (m, 1H), 5.73 – 5.66 (m, 1H), 4.55 (d, *J* = 5.8 Hz, 2H), 3.24 (d, *J* = 14.0 Hz, 1H), 3.06 (d, *J* = 14.0 Hz, 1H), 2.66 (brs, 1H), 1.74 (d, *J* = 6.4 Hz, 3H), 1.46 – 1.40 (m, 1H), 0.70 – 0.64 (m, 1H), 0.55 – 0.46 (m, 2H), 0.25 – 0.20 (m, 1H). <sup>13</sup>C NMR (151 MHz, CDCl<sub>3</sub>) δ 152.67, 143.61, 133.11, 130.69, 130.03, 126.20, 116.01, 112.53, 81.42, 69.50, 45.06, 19.02, 17.80, 2.34, 2.23. HRMS (ESI<sup>+</sup>) for C<sub>15</sub>H<sub>18</sub>NaO<sub>2</sub> [M + Na]<sup>+</sup>: calcd 253.1199; found 253.1194.

**(E)-5-(But-2-en-1-yloxy)-7-phenylbicyclo[4.2.0]octa-1,3,5-trien-7-ol (1q)**

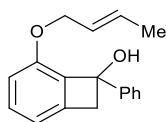

Following the general procedure, benzocyclobutenone **SI-8** (0.56 g, 3.0 mmol), PhMgBr (1.0 M in THF, 4.5 mL, 4.5 mmol) and THF (15.0 mL) were used. The reaction was stirred at room temperature for 1.5 h. Purification by column chromatography on silica gel (petroleum ether : ethyl acetate = 40 : 1) afforded **1q** as a yellow liquid (0.55 g, 69% yield). <sup>1</sup>H NMR (400 MHz, CDCl<sub>3</sub>) δ 7.51 – 7.43 (m, 2H), 7.38 – 7.21 (m, 4H), 6.84 – 6.81 (m, 2H), 5.71 – 5.63 (m, 1H), 5.58 – 5.51 (m, 1H), 4.54 – 4.50 (m, 1H), 4.29 – 4.17 (m, 1H), 3.57 – 3.45 (m, 2H), 3.19 (brs, 1H), 1.68 (dd, *J* = 6.3, 1.2 Hz, 3H). <sup>13</sup>C NMR (101 MHz, CDCl<sub>3</sub>) δ 152.66, 144.20, 143.72, 133.18, 131.33, 130.16, 128.25, 127.25, 126.08, 125.30, 116.12, 114.51, 81.14, 70.06, 50.44, 17.73. HRMS (ESI<sup>+</sup>) for C<sub>18</sub>H<sub>18</sub>NaO<sub>2</sub> [M + Na]<sup>+</sup>: calcd 289.1199; found 289.1198.

**(E)-5-(But-2-en-1-yloxy)-7-(2,5-dimethylphenyl)bicyclo[4.2.0]octa-1,3,5-trien-7-ol**

**(1r)**

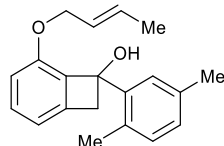

Following the general procedure, benzocyclobutenone **SI-8** (0.38 g, 2.0 mmol), 2,5-dimethylphenylmagnesium bromide (1.0 M in THF, 3.0 mL, 3.0 mmol) and Et<sub>2</sub>O (6.0 mL) were used. The reaction was stirred at 0 °C for 1 h. Purification by column chromatography on silica gel (petroleum ether : ethyl acetate = 40 : 1) afforded **1r** as a yellow liquid (0.39 g, 53% yield). <sup>1</sup>H NMR (400 MHz, CDCl<sub>3</sub>) δ 7.33 – 7.27 (m, 2H), 7.12 (d, *J* = 7.6 Hz, 1H), 7.02 (d, *J* = 7.6 Hz, 1H), 6.86 (d, *J* = 8.4 Hz, 1H), 6.80 (d, *J* = 7.1 Hz, 1H), 5.90 – 5.81 (m, 1H), 5.76 – 5.69 (m, 1H), 4.64 – 4.63 (m, 2H), 3.62 (d, *J* = 13.9 Hz, 1H), 3.58 (d, *J* = 13.9 Hz, 1H), 2.64 (s, 1H), 2.51 (s, 3H), 2.25 (s, 3H), 1.74 (dd, *J* = 6.3, 1.1 Hz, 3H). <sup>13</sup>C NMR (101 MHz, CDCl<sub>3</sub>) δ 152.93, 143.43, 140.37, 134.59, 133.85, 133.67, 131.35, 131.18, 130.21, 128.51, 128.48, 126.08, 116.44, 112.58, 83.10, 69.55, 48.35, 20.94, 19.69, 17.84. HRMS (ESI<sup>+</sup>) for C<sub>20</sub>H<sub>22</sub>NaO<sub>2</sub> [M + Na]<sup>+</sup>: calcd 317.1512; found 317.1506.

**(E)-5-(But-2-en-1-yloxy)-7-(3-methoxyphenyl)bicyclo[4.2.0]octa-1,3,5-trien-7-ol**

**(1s)**

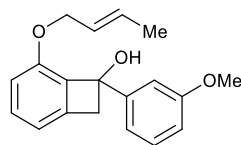

Following the general procedure, benzocyclobutenone **SI-8** (0.56 g, 3.0 mmol), 3-methoxyphenylmagnesium bromide (1.0 M in THF, 4.5 mL, 4.5 mmol) and THF (15.0 mL) were used. The reaction was stirred at 0 °C for 3 h. Purification by column chromatography on silica gel (petroleum ether : ethyl acetate = 40 : 1) afforded **1s** as a yellow liquid (0.59 g, 67% yield). <sup>1</sup>H NMR (400 MHz, CDCl<sub>3</sub>) δ 7.29 – 7.21 (m, 2H), 7.11 – 7.10 (m, 1H), 7.01 (dd, *J* = 7.7, 1.0 Hz, 1H), 6.82 – 6.78 (m, 3H), 5.72 – 5.64

(m, 1H), 5.61 – 5.52 (m, 1H), 4.54 – 4.49 (m, 1H), 4.30 – 4.25 (m, 1H), 3.78 (s, 3H), 3.50 (q,  $J = 14.1$  Hz, 2H), 3.05 (brs, 1H), 1.67 (dd,  $J = 6.4, 1.1$  Hz, 3H).  $^{13}\text{C}$  NMR (101 MHz,  $\text{CDCl}_3$ )  $\delta$  159.56, 152.57, 145.91, 143.69, 133.05, 131.33, 130.20, 129.29, 126.08, 117.75, 116.11, 114.34, 112.85, 111.03, 81.07, 69.96, 55.15, 50.31, 17.74.

**(*E*)-5-(But-2-en-1-yloxy)-7-(4-methoxyphenyl)bicyclo[4.2.0]octa-1,3,5-trien-7-ol (1t)**

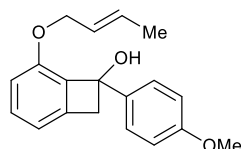

Following the general procedure, benzocyclobutenone **SI-8** (0.56 g, 3.0 mmol), 4-methoxyphenylmagnesium bromide (1.0 M in THF, 4.5 mL, 4.5 mmol) and THF (15.0 mL) were used. The reaction was stirred at 0 °C for 1 h. Purification by column chromatography on silica gel (petroleum ether : ethyl acetate = 25 : 1) afforded **1t** as a yellow liquid (0.49 g, 56% yield).  $^1\text{H}$  NMR (400 MHz,  $\text{CDCl}_3$ )  $\delta$  7.40 (d,  $J = 8.7$  Hz, 2H), 7.29 – 7.25 (m, 1H), 6.86 (d,  $J = 8.8$  Hz, 2H), 6.82 – 6.78 (m, 2H), 5.74 – 5.63 (m, 1H), 5.62 – 5.53 (m, 1H), 4.55 – 4.51 (m, 1H), 4.31 – 4.27 (m, 1H), 3.80 (s, 3H), 3.51 (s, 2H), 2.75 (s, 1H), 1.68 (dd,  $J = 6.3, 1.0$  Hz, 3H).  $^{13}\text{C}$  NMR (101 MHz,  $\text{CDCl}_3$ )  $\delta$  158.78, 152.70, 143.66, 136.52, 133.37, 131.28, 130.16, 126.66, 126.16, 116.16, 114.41, 113.57, 81.01, 70.10, 55.25, 50.41, 17.77. HRMS (ESI<sup>+</sup>) for  $\text{C}_{19}\text{H}_{20}\text{NaO}_3$  [ $\text{M} + \text{Na}$ ]<sup>+</sup>: calcd 319.1305; found 319.1307.

**(*E*)-5-(But-2-en-1-yloxy)-7-(thiophen-2-yl)bicyclo[4.2.0]octa-1,3,5-trien-7-ol (1u)<sup>6</sup>**

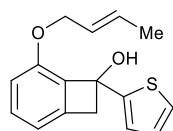

$^n\text{BuLi}$  (2.5 M in THF, 1.2 mL, 3.0 mmol) was added dropwise to a solution of *o*-bromothiophene (0.29 mL, 3.0 mmol) in  $\text{Et}_2\text{O}$  (6.0 mL) at -78 °C. The solution was warmed to and stirred at room temperature for 1h. The mixture was re-cooled to -78 °C after the appearance of white solid. A solution of benzocyclobutenone **SI-8** (0.38 g, 2.0 mmol) in  $\text{Et}_2\text{O}$  (6.0 mL) was then added dropwise. After stirring at -78 °C for another 1 h, the reaction was warmed to room temperature and quenched with

saturated aqueous  $\text{NH}_4\text{Cl}$  solution. The aqueous phase was extracted with EtOAc for three times. The combined organic phases were washed with brine, dried over anhydrous  $\text{MgSO}_4$ , filtered, and evaporated. The residue was purified by column chromatography on silica gel (petroleum ether : ethyl acetate = 20 : 1) to afford benzocyclobutenol **1u** as an orange liquid (0.38 g, 70% yield).  $^1\text{H}$  NMR (400 MHz,  $\text{CDCl}_3$ )  $\delta$  7.29 (d,  $J$  = 8.2 Hz, 1H), 7.23 (d,  $J$  = 4.9 Hz, 1H), 6.95 – 6.91 (m, 2H), 6.82 – 6.78 (m, 2H), 5.77 – 5.69 (m, 1H), 5.64 – 5.57 (m, 1H), 4.56 (dd,  $J$  = 11.7, 5.7 Hz, 1H), 4.39 (dd,  $J$  = 11.6, 6.0 Hz, 1H), 3.62 (d,  $J$  = 14.1 Hz, 1H), 3.56 (d,  $J$  = 14.1 Hz, 1H), 3.15 (s, 1H), 1.70 (d,  $J$  = 6.3 Hz, 3H).  $^{13}\text{C}$  NMR (151 MHz,  $\text{CDCl}_3$ )  $\delta$  152.54, 148.85, 143.17, 133.15, 131.65, 130.26, 126.63, 126.08, 124.72, 123.81, 116.21, 114.40, 78.75, 70.13, 51.12, 17.77. HRMS (ESI<sup>+</sup>) for  $\text{C}_{16}\text{H}_{16}\text{NaO}_2\text{S}$  [ $\text{M} + \text{Na}$ ]<sup>+</sup>: calcd 295.0763; found 295.0761.

### III. Optimization of the reaction of benzocyclobutenol **1a**

To an oven-dried Schlenk tube with a stirring bar was successively added catalyst, ligand, base, and benzocyclobutenol **1a** (43.7 mg, 0.2 mmol). The tube was evacuated and backfilled with inert gas for three times and solvent (1.0 mL) was then added. The tube was directly placed in an oil bath at 110 °C and stirred for 3 h. The reaction mixture was then quenched with saturated aqueous  $\text{NH}_4\text{Cl}$  solution and extracted with EtOAc for three times. The combined organic phases were washed with brine and dried over anhydrous  $\text{MgSO}_4$ . The solvent was evaporated and the crude product was analyzed by  $^1\text{H}$  NMR spectrometer.

#### Table S1. Optimization of the reaction of benzocyclobutenol **1a**.

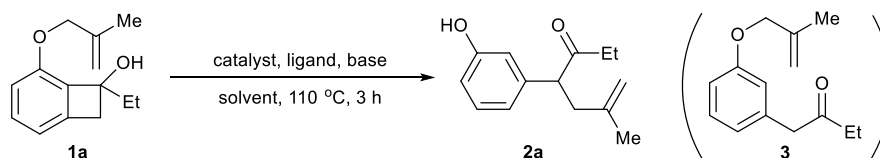

| Entry           | Catalyst                                    | Ligand                                                               | Base                                      | Solvent            | Yield (%) <sup>a</sup> |
|-----------------|---------------------------------------------|----------------------------------------------------------------------|-------------------------------------------|--------------------|------------------------|
| 1               | 4 mol% Pd(OAc) <sub>2</sub>                 | 8 mol% PPh <sub>3</sub>                                              | 1.5 equiv Cs <sub>2</sub> CO <sub>3</sub> | 1,4-dioxane        | 63                     |
| 2               | 4 mol% Pd(OAc) <sub>2</sub>                 | 8 mol% ( <i>p</i> -MeOC <sub>6</sub> H <sub>4</sub> ) <sub>3</sub> P | 1.5 equiv Cs <sub>2</sub> CO <sub>3</sub> | 1,4-dioxane        | 57                     |
| 3               | 4 mol% Pd(OAc) <sub>2</sub>                 | 8 mol% dppm                                                          | 1.5 equiv Cs <sub>2</sub> CO <sub>3</sub> | 1,4-dioxane        | 0 (62) <sup>b</sup>    |
| 4               | 4 mol% Pd(OAc) <sub>2</sub>                 | 8 mol% dppe                                                          | 1.5 equiv Cs <sub>2</sub> CO <sub>3</sub> | 1,4-dioxane        | 79                     |
| 5               | 4 mol% Pd(OAc) <sub>2</sub>                 | 8 mol% dppp                                                          | 1.5 equiv Cs <sub>2</sub> CO <sub>3</sub> | 1,4-dioxane        | 69                     |
| 6               | 4 mol% Pd(OAc) <sub>2</sub>                 | 8 mol% dppb                                                          | 1.5 equiv Cs <sub>2</sub> CO <sub>3</sub> | 1,4-dioxane        | 60                     |
| 7               | 4 mol% Pd(OAc) <sub>2</sub>                 | 8 mol% dppf                                                          | 1.5 equiv Cs <sub>2</sub> CO <sub>3</sub> | 1,4-dioxane        | 62                     |
| 8               | 4 mol% Pd(OAc) <sub>2</sub>                 | 8 mol% dppe                                                          | 1.5 equiv Cs <sub>2</sub> CO <sub>3</sub> | DMF                | 64                     |
| 9               | 4 mol% Pd(OAc) <sub>2</sub>                 | 8 mol% dppe                                                          | 1.5 equiv Cs <sub>2</sub> CO <sub>3</sub> | CH <sub>3</sub> CN | 74                     |
| 10              | 4 mol% Pd(OAc) <sub>2</sub>                 | 8 mol% dppe                                                          | 1.5 equiv Cs <sub>2</sub> CO <sub>3</sub> | THF                | 57                     |
| 11              | 4 mol% Pd(OAc) <sub>2</sub>                 | 8 mol% dppe                                                          | 1.5 equiv Na <sub>2</sub> CO <sub>3</sub> | 1,4-dioxane        | 0 (85) <sup>c</sup>    |
| 12              | 4 mol% Pd(OAc) <sub>2</sub>                 | 8 mol% dppe                                                          | 1.5 equiv K <sub>2</sub> CO <sub>3</sub>  | 1,4-dioxane        | 73                     |
| 13              | 4 mol% Pd(OAc) <sub>2</sub>                 | 8 mol% dppe                                                          | 1.5 equiv KHCO <sub>3</sub>               | 1,4-dioxane        | 48 (14) <sup>b</sup>   |
| 14              | 4 mol% Pd(OAc) <sub>2</sub>                 | 8 mol% dppe                                                          | 1.5 equiv NaHCO <sub>3</sub>              | 1,4-dioxane        | 41(18) <sup>b</sup>    |
| 15              | 4 mol% Pd(OAc) <sub>2</sub>                 | 8 mol% dppe                                                          | 1.5 equiv CsF                             | 1,4-dioxane        | 38 (16) <sup>b</sup>   |
| 16              | 4 mol% Pd(OAc) <sub>2</sub>                 | 8 mol% dppe                                                          | 1.5 equiv K <sub>3</sub> PO <sub>4</sub>  | 1,4-dioxane        | 81                     |
| 17 <sup>d</sup> | 4 mol% Pd(OAc) <sub>2</sub>                 | 8 mol% dppe                                                          | 1.5 equiv K <sub>3</sub> PO <sub>4</sub>  | 1,4-dioxane        | 12 (41) <sup>b</sup>   |
| 18              | 4 mol% Pd(OAc) <sub>2</sub>                 | 8 mol% dppe                                                          | 3.0 equiv K <sub>3</sub> PO <sub>4</sub>  | 1,4-dioxane        | 74                     |
| 19              | 4 mol% Pd(OAc) <sub>2</sub>                 | 8 mol% dppe                                                          | 0.5 equiv K <sub>3</sub> PO <sub>4</sub>  | 1,4-dioxane        | 85                     |
| 20              | 4 mol% Pd(acac) <sub>2</sub>                | 8 mol% dppe                                                          | 0.5 equiv K <sub>3</sub> PO <sub>4</sub>  | 1,4-dioxane        | 79                     |
| 21              | 4 mol% PdCl <sub>2</sub>                    | 8 mol% dppe                                                          | 0.5 equiv K <sub>3</sub> PO <sub>4</sub>  | 1,4-dioxane        | 0 (78) <sup>b</sup>    |
| 22              | 4 mol% Pd(PPh <sub>3</sub> ) <sub>4</sub>   | 8 mol% dppe                                                          | 0.5 equiv K <sub>3</sub> PO <sub>4</sub>  | 1,4-dioxane        | 84                     |
| 23              | 4 mol% Pd <sub>2</sub> (dba) <sub>3</sub>   | 8 mol% dppe                                                          | 0.5 equiv K <sub>3</sub> PO <sub>4</sub>  | 1,4-dioxane        | 83                     |
| 24              | 4 mol% Pd(OCOCF <sub>3</sub> ) <sub>2</sub> | 8 mol% dppe                                                          | 0.5 equiv K <sub>3</sub> PO <sub>4</sub>  | 1,4-dioxane        | 4 (66) <sup>b</sup>    |
| 25              | 2 mol% Pd(OAc) <sub>2</sub>                 | 4 mol% dppe                                                          | 0.5 equiv K <sub>3</sub> PO <sub>4</sub>  | 1,4-dioxane        | 85 (86) <sup>e</sup>   |
| 26              | 1 mol% Pd(OAc) <sub>2</sub>                 | 2 mol% dppe                                                          | 0.5 equiv K <sub>3</sub> PO <sub>4</sub>  | 1,4-dioxane        | 49                     |
| 27              | 2 mol% Pd(OAc) <sub>2</sub>                 | 2 mol% dppe                                                          | 0.5 equiv K <sub>3</sub> PO <sub>4</sub>  | 1,4-dioxane        | 30 (16) <sup>b</sup>   |
| 28              | 2 mol% Pd(OAc) <sub>2</sub>                 | 4 mol% dppe                                                          | none                                      | 1,4-dioxane        | unrepeatable           |
| 29              | 2 mol% Pd(OAc) <sub>2</sub>                 | none                                                                 | 0.5 equiv K <sub>3</sub> PO <sub>4</sub>  | 1,4-dioxane        | 0 (74) <sup>b</sup>    |
| 30              | none                                        | none                                                                 | 0.5 equiv K <sub>3</sub> PO <sub>4</sub>  | 1,4-dioxane        | 0 (78) <sup>b</sup>    |
| 31              | none                                        | none                                                                 | none                                      | 1,4-dioxane        | 0                      |

<sup>a</sup> Yields were determined by <sup>1</sup>H NMR spectroscopy using 1,1,2,2-tetrachloroethane as the internal standard. <sup>b</sup> NMR yield of **3** was given in the parenthesis. <sup>c</sup> 85% of **1a** was unreacted as determined by crude <sup>1</sup>H NMR spectroscopy. <sup>d</sup> At 80 °C. <sup>e</sup> Isolated yield was given in the parenthesis. dppm = bis(diphenylphosphino)methane, dppe = 1,2-bis(diphenylphosphino)ethane, dppp = 1,3-bis(diphenylphosphino)propane, dppb = 1,4-bis(diphenylphosphino)butane, dppf = 1,1'-Bis(diphenylphosphino)ferrocene.

#### IV. Optimization of the asymmetric synthesis of **2a**

A solution of Pd(OAc)<sub>2</sub> in 1,4-dioxane (4.0 mM) was prepared, stored in the glove box and used for the catalytic reaction. To an oven-dried Schlenk tube with a stirring

bar was successively added ligand (8.0  $\mu\text{mol}$ ),  $\text{K}_3\text{PO}_4$  (21.2 mg, 0.1 mmol), and benzocyclobutenol **1a** (43.7 mg, 0.2 mmol). The tube was evacuated and backfilled with inert gas for three times. After the addition of  $\text{Pd}(\text{OAc})_2$  (1.0 mL, 4.0  $\mu\text{mol}$ ), the tube was directly placed in an oil bath at 110  $^\circ\text{C}$  and stirred for 3 h. The mixture was then quenched with saturated aqueous  $\text{NH}_4\text{Cl}$  solution and extracted with EtOAc for three times. The combined organic phases were washed with brine and dried over anhydrous  $\text{MgSO}_4$ . The solvent was evaporated and the residue was purified by column chromatography on silica gel (petroleum ether : ethyl acetate = 20 : 1) to afford **2a**. Pure **2a** was then analyzed by chiral HPLC to determine the enantiopurity.

**Table S2. Optimization of the asymmetric synthesis of **2a**<sup>a</sup>**

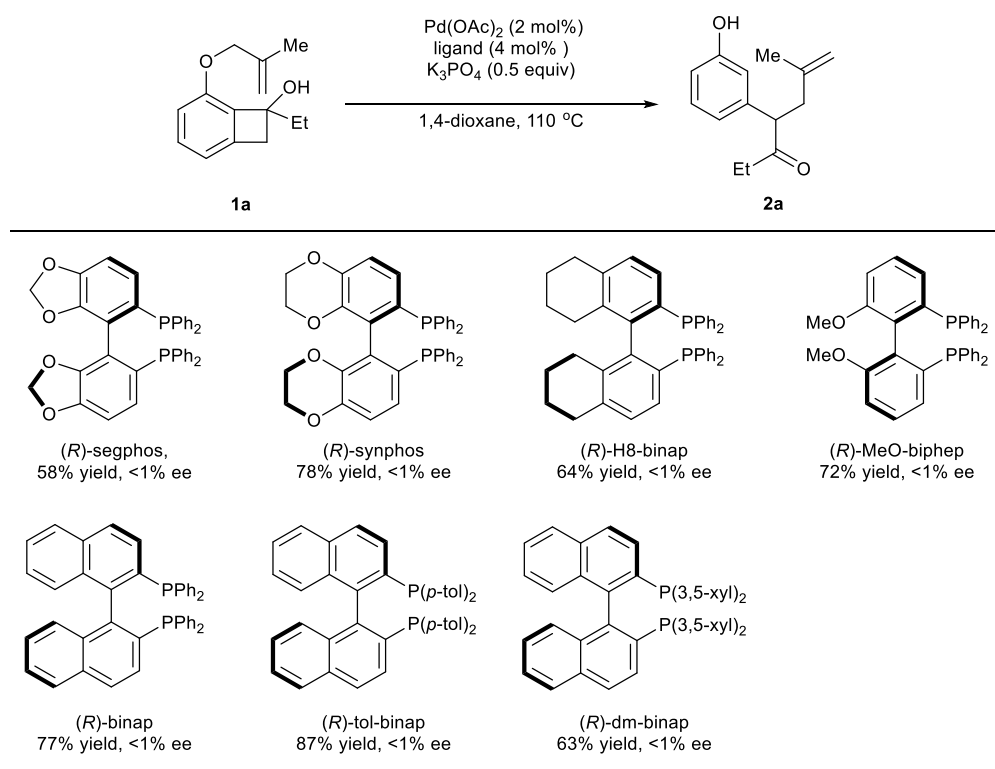

<sup>a</sup> HPLC analysis: Chiralcel OD, eluent hexane:*i*-propanol 95%:5%, flow rate 1.0 mL/min, 25  $^\circ\text{C}$ , 254 nm,  $t_{\text{R}1}$  = 7.4 min and  $t_{\text{R}2}$  = 8.1 min.

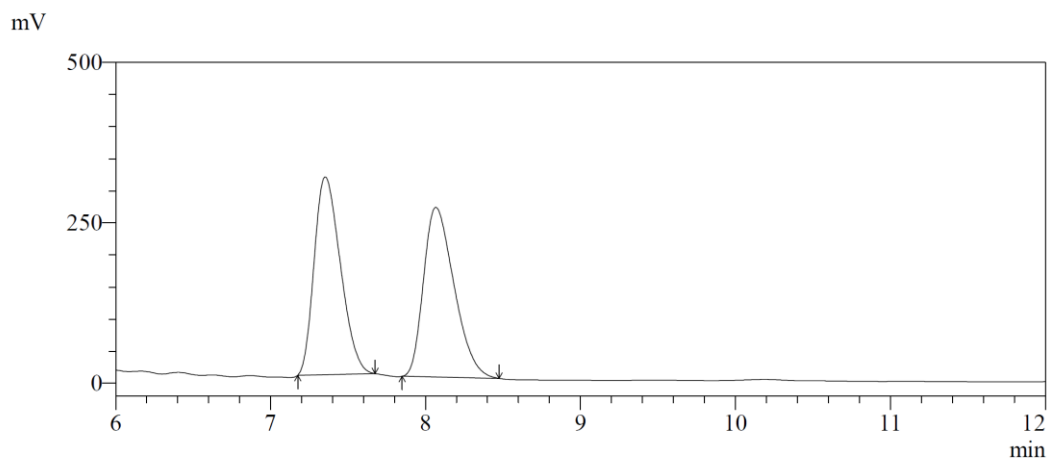

Peak Table

| Detector A 254nm |           |      |          |         |        |         |
|------------------|-----------|------|----------|---------|--------|---------|
| Peak#            | Ret. Time | S/N  | Noise    | Area    | Height | Area%   |
| 1                | 7.353     | 4.31 | 71427.41 | 3633758 | 308081 | 50.048  |
| 2                | 8.067     | 3.71 | 71427.41 | 3626815 | 264672 | 49.952  |
| Total            |           |      |          | 7260572 | 572752 | 100.000 |

Figure S1 HPLC trace of racemic **2a**

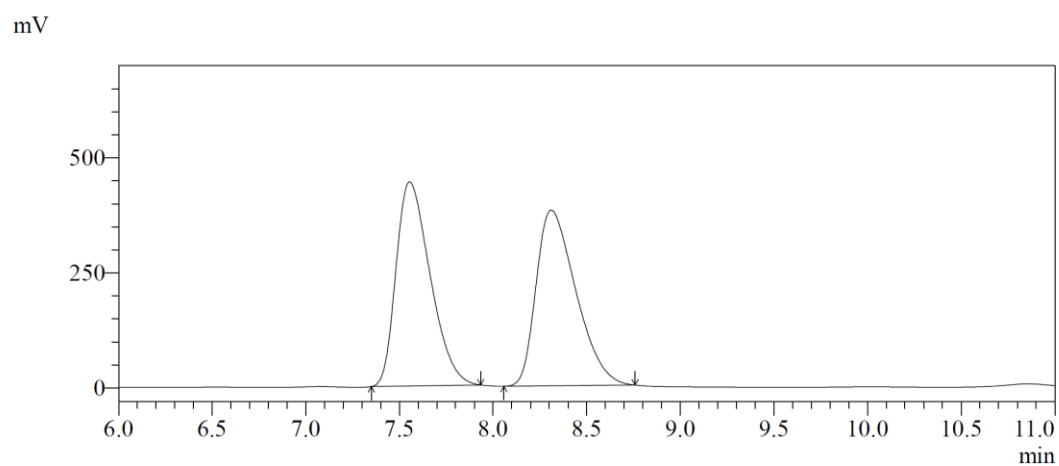

Peak Table

| Detector A 254nm |           |        |         |          |        |         |
|------------------|-----------|--------|---------|----------|--------|---------|
| Peak#            | Ret. Time | S/N    | Noise   | Area     | Height | Area%   |
| 1                | 7.554     | 202.04 | 2193.26 | 5626605  | 443131 | 49.931  |
| 2                | 8.311     | 174.23 | 2193.26 | 5642197  | 382124 | 50.069  |
| Total            |           |        |         | 11268801 | 825255 | 100.000 |

Figure S2 HPLC trace of **2a** obtained by using (*R*)-seghos as the ligand

mV

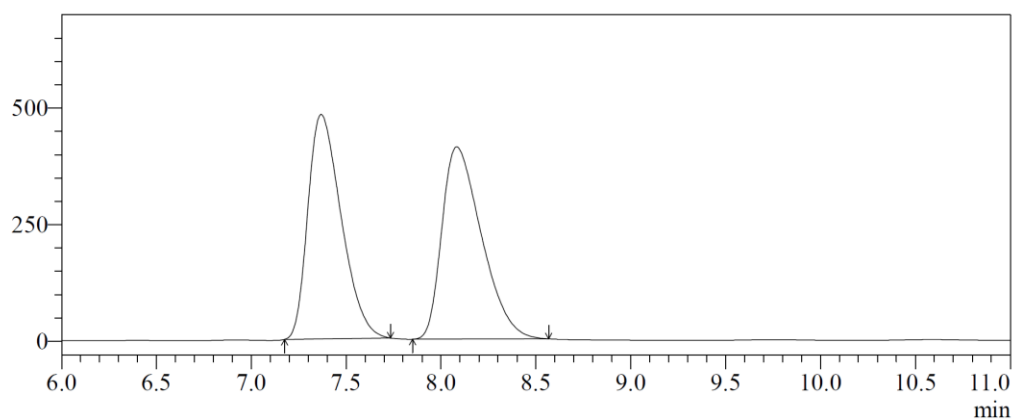

Peak Table

Detector A 254nm

| Peak# | Ret. Time | S/N    | Noise   | Area     | Height | Area%   |
|-------|-----------|--------|---------|----------|--------|---------|
| 1     | 7.368     | 325.70 | 1479.81 | 5887006  | 481977 | 49.560  |
| 2     | 8.083     | 278.78 | 1479.81 | 5991439  | 412542 | 50.440  |
| Total |           |        |         | 11878445 | 894519 | 100.000 |

Figure S3 HPLC trace of **2a** obtained by using (*R*)-synphos as the ligand

mV

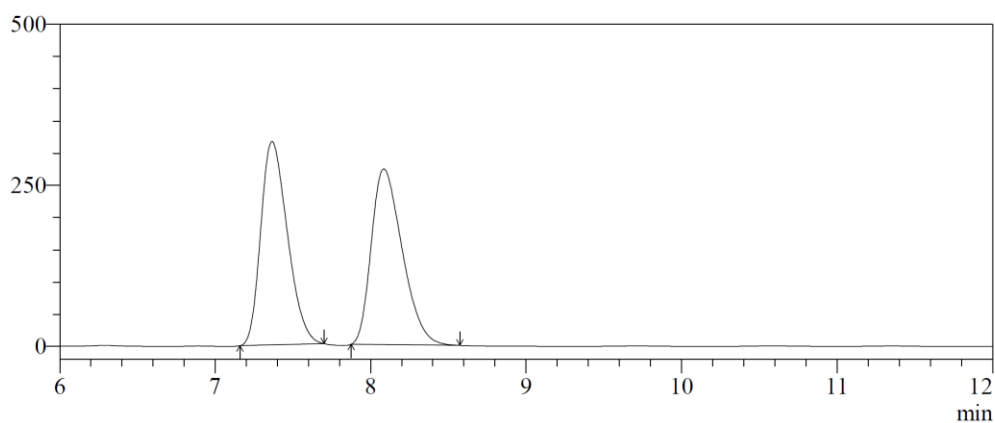

Peak Table

Detector A 254nm

| Peak# | Ret. Time | S/N    | Noise   | Area    | Height | Area%   |
|-------|-----------|--------|---------|---------|--------|---------|
| 1     | 7.366     | 237.42 | 1331.44 | 3773918 | 316111 | 49.998  |
| 2     | 8.085     | 204.90 | 1331.44 | 3774204 | 272808 | 50.002  |
| Total |           |        |         | 7548122 | 588919 | 100.000 |

Figure S4 HPLC trace of **2a** obtained by using (*R*)-H8-binap as the ligand



mV

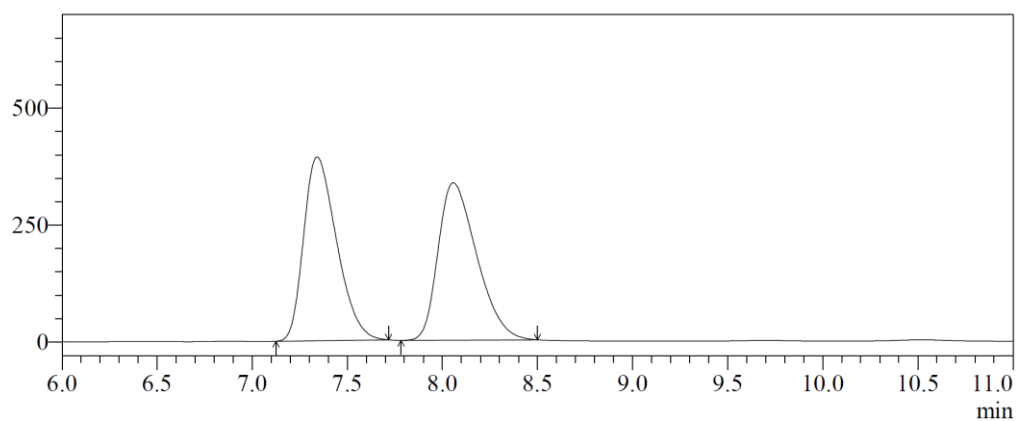

Peak Table

| Detector A 254nm |           |        |         |         |        |         |
|------------------|-----------|--------|---------|---------|--------|---------|
| Peak#            | Ret. Time | S/N    | Noise   | Area    | Height | Area%   |
| 1                | 7.341     | 349.88 | 1124.29 | 4750522 | 393371 | 49.946  |
| 2                | 8.057     | 299.58 | 1124.29 | 4760860 | 336819 | 50.054  |
| Total            |           |        |         | 9511382 | 730190 | 100.000 |

Figure S5 HPLC trace of **2a** obtained by using (*R*)-MeO-biphep as the ligand

mV

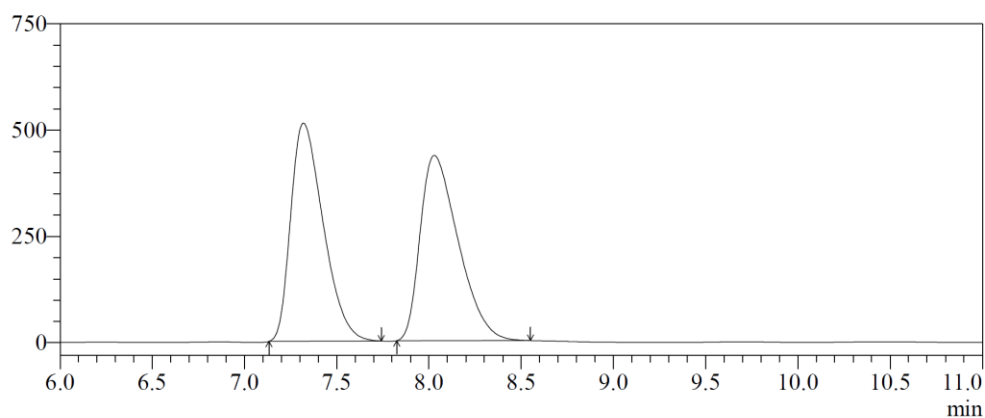

Peak Table

| Detector A 254nm |           |        |         |          |        |         |
|------------------|-----------|--------|---------|----------|--------|---------|
| Peak#            | Ret. Time | S/N    | Noise   | Area     | Height | Area%   |
| 1                | 7.319     | 162.18 | 3164.17 | 6293285  | 513176 | 50.134  |
| 2                | 8.029     | 137.61 | 3164.17 | 6259583  | 435424 | 49.866  |
| Total            |           |        |         | 12552868 | 948601 | 100.000 |

Figure S6 HPLC trace of **2a** obtained by using (*R*)-binap as the ligand

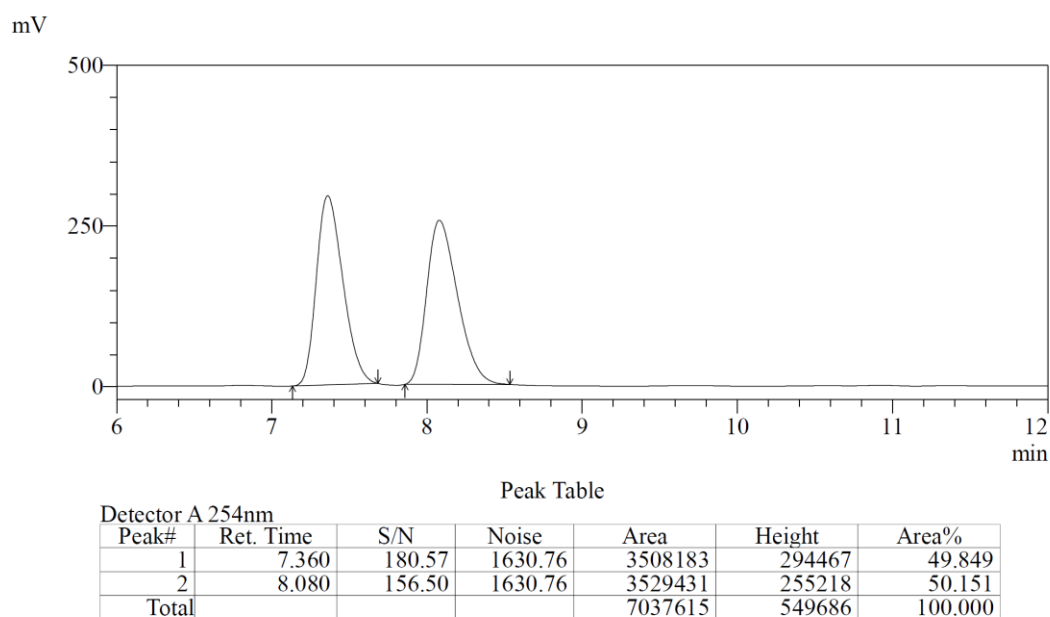

Figure S7 HPLC trace of **2a** obtained by using (*R*)-tol-binap as the ligand

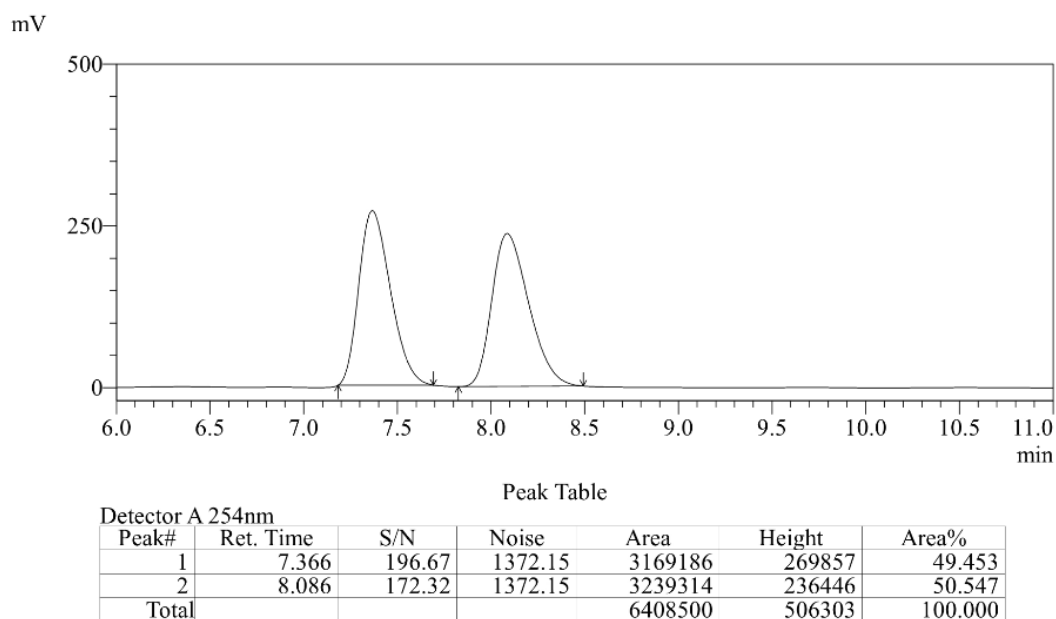

Figure S8 HPLC trace of **2a** by using (*R*)-dm-binap as the ligand

## V. General procedure for the reactions of benzocyclobutenols

### General procedure A: synthesis of *meta*- $\beta$ -keto phenols

A solution of Pd(OAc)<sub>2</sub> in 1,4-dioxane (4.0 mM) was prepared, stored in the glove box and used for the catalytic reaction. To an oven-dried Schlenk tube with a stirring bar was successively added dppe (3.2 mg, 8.0  $\mu$ mol), K<sub>3</sub>PO<sub>4</sub> (21.2 mg, 0.1 mmol), and

benzocyclobutenol **1** (0.2 mmol). The tube was evacuated and backfilled with inert gas for three times. After the addition of Pd(OAc)<sub>2</sub> (1.0 mL, 4.0 μmol), the tube was directly placed in an oil bath at 110 °C and stirred for 3 h. The mixture was then quenched with saturated aqueous NH<sub>4</sub>Cl solution and extracted with EtOAc for three times. The combined organic phases were washed with brine and dried over anhydrous MgSO<sub>4</sub>. The solvent was evaporated and the residue was purified by column chromatography on silica gel to afford the desired product **2** or **5**.

### General procedure B: the distal C–C bond cleavage/deallylation cascade

A solution of Pd(OAc)<sub>2</sub> in 1,4-dioxane (5.0 mM) was prepared, stored in the glove box and used for the catalytic reaction. To an oven-dried Schlenk tube with a stirring bar was added K<sub>3</sub>PO<sub>4</sub> (21.2 mg, 0.1 mmol), benzocyclobutenol **1** (0.2 mmol) and 1,4-dioxane (0.5 mL). After stirring at 110 °C for 1h, the tube was cooled to room temperature. Pd(OAc)<sub>2</sub> (0.8 mL, 4.0 μmol) and dppe (3.2 mg, 8.0 μmol) were successively added. The resulting solution was stirred at 110 °C for additional 3 h. Saturated aqueous NH<sub>4</sub>Cl solution was added and the mixture was extracted with EtOAc for three times. The combined organic phases were washed with brine and dried over anhydrous MgSO<sub>4</sub>. The solvent was evaporated and the residue was purified by column chromatography on silica gel to afford the desired product **6**.

## VI. Characterizations of products **2**, **5** and **6**

### 4-(3-Hydroxyphenyl)-6-methylhept-6-en-3-one (**2a**)

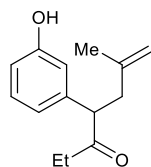

Following the general procedure A, benzocyclobutenol **1a** (43.7 mg, 0.2 mmol) was used. Purification by column chromatography on silica gel (petroleum ether : ethyl acetate = 20 : 1) afforded **2a** as a yellow liquid (37.6 mg, 86% yield). <sup>1</sup>H NMR (400 MHz, CDCl<sub>3</sub>) δ 7.30 (brs, 1H), 7.17 (dd, *J* = 9.6, 5.7 Hz, 1H), 6.80 – 6.77 (m, 3H), 4.69 (s, 1H), 4.58 (s, 1H), 3.89 (t, *J* = 7.4 Hz, 1H), 2.80 (dd, *J* = 14.8, 8.0 Hz, 1H),

2.57 – 2.34 (m, 3H), 1.66 (s, 3H), 0.97 (t,  $J = 7.3$  Hz, 3H).  $^{13}\text{C}$  NMR (151 MHz,  $\text{CDCl}_3$ )  $\delta$  212.10, 156.45, 142.90, 140.20, 129.99, 120.65, 114.56, 114.54, 111.96, 56.73, 39.91, 35.27, 22.79, 7.79. HRMS ( $\text{ESI}^+$ ) for  $\text{C}_{14}\text{H}_{18}\text{NaO}_2$  [ $\text{M} + \text{Na}$ ] $^+$ : calcd 241.1199; found 241.1208.

### 3-(3-Hydroxyphenyl)-5-methylhex-5-en-2-one (2b)

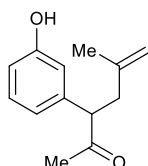

Following the general procedure A, benzocyclobutenol **1b** (40.9 mg, 0.2 mmol) was used. Purification by column chromatography on silica gel (petroleum ether : ethyl acetate = 20 : 1) afforded **2b** as a yellow liquid (37.8 mg, 93% yield).  $^1\text{H}$  NMR (400 MHz,  $\text{CDCl}_3$ )  $\delta$  7.19 (t,  $J = 7.8$  Hz, 1H), 6.90 – 6.50 (m, 4H), 4.71 (s, 1H), 4.60 (s, 1H), 3.87 (t,  $J = 7.4$  Hz, 1H), 2.79 (dd,  $J = 14.9, 7.8$  Hz, 1H), 2.37 (dd,  $J = 14.9, 7.0$  Hz, 1H), 2.12 (s, 3H), 1.67 (s, 3H).  $^{13}\text{C}$  NMR (101 MHz,  $\text{CDCl}_3$ )  $\delta$  209.73, 156.51, 142.74, 139.72, 130.06, 120.53, 114.67, 114.61, 111.97, 57.63, 39.45, 29.08, 22.75. HRMS ( $\text{ESI}^+$ ) for  $\text{C}_{13}\text{H}_{17}\text{O}_2$  [ $\text{M} + \text{H}$ ] $^+$ : calcd 205.1223; found 205.1215.

### 4-(3-Hydroxyphenyl)-2,6-dimethylhept-6-en-3-one (2c)

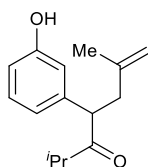

Following the general procedure A, benzocyclobutenol **1c** (46.5 mg, 0.2 mmol) was used. Purification by column chromatography on silica gel (petroleum ether : ethyl acetate = 20 : 1) afforded **2c** as a yellow liquid (28.5 mg, 61% yield).  $^1\text{H}$  NMR (400 MHz,  $\text{CDCl}_3$ )  $\delta$  7.17 (t,  $J = 8.0$  Hz, 1H), 6.79 – 6.76 (m, 3H), 6.56 (brs, 1H), 4.70 (s, 1H), 4.60 (s, 1H), 4.02 (t,  $J = 7.3$  Hz, 1H), 2.80 – 2.68 (m, 2H), 2.33 (dd,  $J = 14.5, 6.7$  Hz, 1H), 1.67 (s, 3H), 1.08 (d,  $J = 7.0$  Hz, 3H), 0.92 (d,  $J = 6.7$  Hz, 3H).  $^{13}\text{C}$  NMR (151 MHz,  $\text{CDCl}_3$ )  $\delta$  215.12, 156.41, 142.90, 140.16, 129.97, 120.90, 114.54, 114.48,

112.14, 55.48, 40.51, 40.16, 22.82, 18.79, 18.24. HRMS (ESI<sup>+</sup>) for C<sub>15</sub>H<sub>21</sub>O<sub>2</sub> [M + H]<sup>+</sup>: calcd 233.1536; found 233.1535.

### 1-Cyclopropyl-2-(3-hydroxyphenyl)-4-methylpent-4-en-1-one (2d)

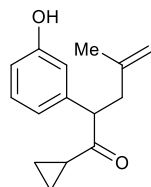

Following the general procedure A, benzocyclobutenol **1d** (46.1 mg, 0.2 mmol) was used. Purification by column chromatography on silica gel (petroleum ether : ethyl acetate = 20 : 1) afforded **2d** as a yellow liquid (26.2 mg, 57% yield). <sup>1</sup>H NMR (400 MHz, CDCl<sub>3</sub>) δ 7.19 (t, *J* = 7.8 Hz, 1H), 6.82 (d, *J* = 7.6 Hz, 1H), 6.79 – 6.72 (m, 2H), 6.63 (s, 1H), 4.70 (s, 1H), 4.60 (s, 1H), 4.02 (t, *J* = 7.4 Hz, 1H), 2.82 (dd, *J* = 14.9, 7.8 Hz, 1H), 2.36 (dd, *J* = 14.9, 7.0 Hz, 1H), 2.01 – 1.93 (m, 1H), 1.67 (s, 3H), 1.03 – 0.98 (m, 2H), 0.90 – 0.84 (m, 1H), 0.80 – 0.74 (m, 1H). <sup>13</sup>C NMR (151 MHz, CDCl<sub>3</sub>) δ 211.50, 156.48, 142.91, 140.09, 129.95, 120.88, 114.68, 114.49, 111.87, 57.76, 39.81, 22.82, 20.62, 12.01, 11.72. HRMS (ESI<sup>+</sup>) for C<sub>15</sub>H<sub>18</sub>NaO<sub>2</sub> [M + Na]<sup>+</sup>: calcd 253.1199; found 253.1207.

### 3-(3-Hydroxyphenyl)-5-methyl-1-phenylhex-5-en-2-one (2e) and 1-(3-hydroxyphenyl)-5-methyl-3-phenylhex-5-en-2-one (2e')

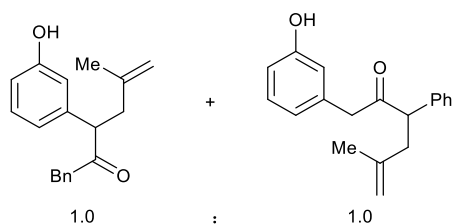

Following the general procedure B, benzocyclobutenol **1e** (56.1 mg, 0.2 mmol) was used. Purification by column chromatography on silica gel (petroleum ether : ethyl acetate = 10 : 1) afforded **2e** and **2e'** as an inseparable mixture in 1:1 ratio (27.3 mg, 49% yield). <sup>1</sup>H NMR (400 MHz, CDCl<sub>3</sub>) δ 7.35 – 7.17 (m, 9H), 7.14 (t, *J* = 7.8 Hz, 1H), 7.07 (s, 1H), 7.05 (s, 1H), 6.78 – 6.75 (m, 2H), 6.73 – 6.69 (m, 2H), 6.61 (d, *J* =

7.5 Hz, 1H), 6.54 (s, 1H), 5.94 (brs, 1H), 5.72 (brs, 1H), 4.65 (s, 2H), 4.51 (s, 2H), 4.02 – 3.94 (m, 2H), 3.67 (s, 2H), 3.60 (s, 2H), 2.83 – 2.74 (m, 2H), 2.37 – 2.29 (m, 2H), 1.58 (s, 6H).  $^{13}\text{C}$  NMR (101 MHz,  $\text{CDCl}_3$ )  $\delta$  207.81, 207.66, 156.29, 155.90, 142.69, 142.67, 139.84, 138.19, 135.34, 133.77, 130.10, 129.77, 129.58, 128.91, 128.56, 128.42, 127.40, 126.97, 121.80, 120.89, 116.48, 114.90, 114.58, 114.13, 112.07, 112.02, 56.00, 55.85, 48.87, 48.69, 39.97, 39.91, 22.66, 22.62. HRMS ( $\text{ESI}^+$ ) for  $\text{C}_{19}\text{H}_{21}\text{O}_2$   $[\text{M} + \text{H}]^+$ : calcd 281.1536; found 281.1535.

#### 4-(5-Hydroxy-2-methylphenyl)-6-methylhept-6-en-3-one (2f)

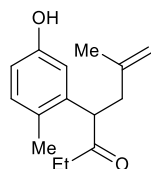

Following the general procedure A, benzocyclobutenol **1f** (46.5 mg, 0.2 mmol) was used. Purification by column chromatography on silica gel (petroleum ether : ethyl acetate = 20 : 1) afforded **2f** as a colorless solid (29.0 mg, 62% yield). M.p.: 67.5 – 68.3 °C.  $^1\text{H}$  NMR (400 MHz,  $\text{CDCl}_3$ )  $\delta$  7.06 (d,  $J = 9.0$  Hz, 1H), 6.80 – 6.60 (m, 3H), 4.70 (s, 1H), 4.59 (s, 1H), 4.14 (dd,  $J = 8.1, 6.2$  Hz, 1H), 2.81 (dd,  $J = 14.7, 8.3$  Hz, 1H), 2.47 – 2.36 (m, 2H), 2.34 (s, 3H), 2.24 (dd,  $J = 14.7, 6.0$  Hz, 1H), 1.67 (s, 3H), 0.98 (t,  $J = 7.3$  Hz, 3H).  $^{13}\text{C}$  NMR (101 MHz,  $\text{CDCl}_3$ )  $\delta$  212.49, 154.80, 143.22, 138.15, 131.89, 127.22, 114.30, 113.67, 111.77, 52.34, 39.79, 35.58, 22.98, 19.05, 7.87. Elemental Anal. for  $\text{C}_{15}\text{H}_{20}\text{O}_2$ : calcd C 77.55%, H 8.68%, found C 77.42%, H 8.45%.

#### 4-(3-Hydroxy-5-methylphenyl)-6-methylhept-6-en-3-one (2g)

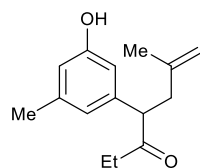

Following the general procedure A, benzocyclobutenol **1g** (46.5 mg, 0.2 mmol) was used and the reaction time was 8 h. Purification by column chromatography on silica

gel (petroleum ether : ethyl acetate = 20 : 1) afforded **2g** as a yellow solid (34.3 mg, 74% yield). M.p.: 75.4 – 76.1 °C. <sup>1</sup>H NMR (400 MHz, CDCl<sub>3</sub>) δ 6.60 – 6.57 (m, 3H), 6.47 (brs, 1H), 4.70 (s, 1H), 4.59 (s, 1H), 3.83 (t, *J* = 7.3 Hz, 1H), 2.79 (dd, *J* = 14.8, 8.2 Hz, 1H), 2.54 – 2.30 (m, 3H), 2.27 (s, 3H), 1.67 (s, 3H), 0.97 (t, *J* = 7.3 Hz, 3H). <sup>13</sup>C NMR (101 MHz, CDCl<sub>3</sub>) δ 212.02, 156.30, 143.04, 140.12, 140.01, 121.45, 115.19, 111.78, 111.68, 56.70, 39.85, 35.22, 22.84, 21.32, 7.79. HRMS (ESI<sup>+</sup>) for C<sub>15</sub>H<sub>21</sub>O<sub>2</sub> [M + H]<sup>+</sup>: calcd 233.1536; found 233.1532.

#### 4-(3-Hydroxyphenyl)-6-methyleneoctan-3-one (**2h**)

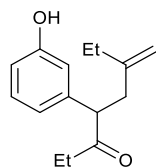

Following the general procedure A, benzocyclobutenol **1h** (46.5 mg, 0.2 mmol) was used and the reaction was placed directly in an oil bath at 110 °C for 5 h. Purification by column chromatography on silica gel (petroleum ether : ethyl acetate = 20 : 1) afforded **2h** as a yellow liquid (30.5 mg, 66% yield). <sup>1</sup>H NMR (400 MHz, CDCl<sub>3</sub>) δ 7.17 (t, *J* = 8.0 Hz, 1H), 6.79 – 6.75 (m, 3H), 4.71 (s, 1H), 4.61 (s, 1H), 3.89 (t, *J* = 8.0 Hz, 1H), 2.83 (dd, *J* = 14.9, 8.2 Hz, 1H), 2.56 – 2.33 (m, 3H), 1.96 (q, *J* = 7.4 Hz, 2H), 0.98 (t, *J* = 7.4 Hz, 3H), 0.97 (t, *J* = 7.3 Hz, 3H). <sup>13</sup>C NMR (151 MHz, CDCl<sub>3</sub>) δ 212.19, 156.45, 148.53, 140.32, 129.98, 120.65, 114.55, 114.51, 109.49, 56.85, 38.43, 35.37, 29.11, 12.17, 7.79. HRMS (ESI<sup>+</sup>) for C<sub>15</sub>H<sub>21</sub>O<sub>2</sub> [M + H]<sup>+</sup>: calcd 233.1536; found 233.1538.

#### 4-(3-Hydroxyphenyl)-6-phenylhept-6-en-3-one (**2i**)

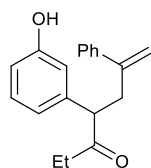

Following the general procedure A, benzocyclobutenol **1i** (56.1 mg, 0.2 mmol) was used. Purification by column chromatography on silica gel (petroleum ether : ethyl

acetate = 20 : 1) afforded **2i** as a colorless liquid (41.8 mg, 75% yield). <sup>1</sup>H NMR (400 MHz, CDCl<sub>3</sub>) δ 7.34 – 7.29 (m, 5H), 7.17 (t, *J* = 7.7 Hz, 1H), 6.94 (brs, 1H), 6.81-6.78 (m, 2H), 6.69 (d, *J* = 7.5 Hz, 1H), 5.19 (s, 1H), 4.94 (s, 1H), 3.80 (t, *J* = 7.2 Hz, 1H), 3.36 (dd, *J* = 14.5, 7.6 Hz, 1H), 2.84 (dd, *J* = 14.5, 6.8 Hz, 1H), 2.48 – 2.38 (m, 1H), 2.33 – 2.23 (m, 1H), 0.93 (t, *J* = 7.2 Hz, 3H). <sup>13</sup>C NMR (151 MHz, CDCl<sub>3</sub>) δ 212.30, 156.49, 145.54, 140.51, 140.02, 129.97, 128.39, 127.54, 126.27, 120.74, 114.82, 114.57, 114.51, 56.63, 38.14, 35.63, 7.73. HRMS (ESI<sup>+</sup>) for C<sub>19</sub>H<sub>20</sub>NaO<sub>2</sub> [M + Na]<sup>+</sup>: calcd 303.1356; found 303.1356.

### 3-(3-Hydroxyphenyl)-5-phenylhex-5-en-2-one (2j)

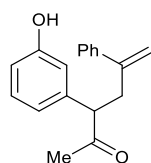

Following the general procedure A, benzocyclobutenol **1j** (53.3 mg, 0.2 mmol) was used. Purification by column chromatography on silica gel (petroleum ether : ethyl acetate = 20 : 1) afforded **2j** as a yellow liquid (38.1 mg, 71% yield). <sup>1</sup>H NMR (600 MHz, CDCl<sub>3</sub>) δ 7.35 – 7.31 (m, 4H), 7.31 – 7.27 (m, 1H), 7.17 (t, *J* = 7.8 Hz, 1H), 6.76 (d, *J* = 8.1 Hz, 1H), 6.68 – 6.66 (m, 2H), 6.10 (brs, 1H), 5.18 (s, 1H), 4.92 (s, 1H), 3.74 (t, *J* = 7.1 Hz, 1H), 3.34 (dd, *J* = 14.7, 7.1 Hz, 1H), 2.80 (dd, *J* = 14.7, 7.4 Hz, 1H), 2.02 (s, 3H). <sup>13</sup>C NMR (151 MHz, CDCl<sub>3</sub>) δ 209.17, 156.36, 145.47, 140.56, 139.80, 130.06, 128.41, 127.57, 126.30, 120.85, 114.86, 114.66, 114.60, 57.56, 37.73, 29.48. HRMS (ESI<sup>+</sup>) for C<sub>18</sub>H<sub>18</sub>NaO<sub>2</sub> [M + Na]<sup>+</sup>: calcd 289.1199; found 289.1202.

### 4-(3-Hydroxyphenyl)hept-6-en-3-one (2k)

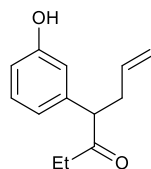

Following the general procedure A, benzocyclobutenol **1k** (40.9 mg, 0.2 mmol) was used. Purification by column chromatography on silica gel (petroleum ether : ethyl acetate = 20 : 1) afforded **2k** as a light brown liquid (26.5 mg, 65% yield). <sup>1</sup>H NMR



(400 MHz, CDCl<sub>3</sub>)  $\delta$  7.19 (t,  $J$  = 7.8 Hz, 1H), 6.79 – 6.76 (m, 3H), 5.70 – 5.60 (m, 1H), 5.03 – 4.93 (m, 2H), 3.71 (t,  $J$  = 7.5 Hz, 1H), 2.80 – 2.73 (m, 1H), 2.54 – 2.34 (m, 3H), 0.97 (t,  $J$  = 7.3 Hz, 3H). <sup>13</sup>C NMR (101 MHz, CDCl<sub>3</sub>)  $\delta$  211.99, 156.46, 139.94, 135.57, 130.07, 120.76, 116.71, 114.59, 114.50, 58.25, 36.38, 35.29, 7.80. HRMS (ESI<sup>+</sup>) for C<sub>13</sub>H<sub>16</sub>NaO<sub>2</sub> [M + Na]<sup>+</sup>: calcd 227.1043; found 227.1046.

### 1-(3-(Cinnamyloxy)phenyl)butan-2-one (2l)

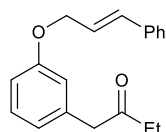

Following the general procedure A, benzocyclobutenol **1l** (56.1 mg, 0.2 mmol) was used and the reaction time was 4 h. Purification by column chromatography on silica gel (petroleum ether : ethyl acetate = 40 : 1) afforded **2l** as a colorless liquid (14.0 mg, 25% yield). <sup>1</sup>H NMR (400 MHz, CDCl<sub>3</sub>)  $\delta$  7.42 (d,  $J$  = 7.7 Hz, 2H), 7.33 (t,  $J$  = 7.4 Hz, 2H), 7.26 – 7.23 (m, 2H), 6.87 (d,  $J$  = 8.5 Hz, 1H), 6.81 – 6.80 (m, 2H), 6.73 (d,  $J$  = 15.9 Hz, 1H), 6.41 (dt,  $J$  = 15.9, 5.8 Hz, 1H), 4.69 (d,  $J$  = 5.7 Hz, 2H), 3.66 (s, 2H), 2.48 (q,  $J$  = 7.3 Hz, 2H), 1.01 (t,  $J$  = 7.3 Hz, 3H). <sup>13</sup>C NMR (151 MHz, CDCl<sub>3</sub>)  $\delta$  208.95, 158.81, 136.36, 135.94, 133.05, 129.72, 128.57, 127.89, 126.54, 124.26, 121.94, 115.85, 113.21, 68.54, 49.89, 35.12, 7.73.

### 1-(3-Hydroxyphenyl)butan-2-one (5a)

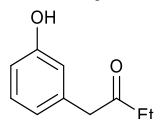

Following the general procedure A, benzocyclobutenol **1m** (43.7 mg, 0.2 mmol) was used. Purification by column chromatography on silica gel (petroleum ether : ethyl acetate = 20 : 1) afforded **5a** as a colorless liquid (29.8 mg, 91% yield). <sup>1</sup>H NMR (400 MHz, CDCl<sub>3</sub>)  $\delta$  7.17 (t,  $J$  = 7.8 Hz, 1H), 6.76 – 6.71 (m, 3H), 6.56 (brs, 1H), 3.64 (s, 2H), 2.50 (q,  $J$  = 7.3 Hz, 2H), 1.03 (t,  $J$  = 7.3 Hz, 3H). <sup>13</sup>C NMR (101 MHz, CDCl<sub>3</sub>)  $\delta$  210.89, 156.24, 135.54, 129.89, 121.38, 116.18, 114.26, 49.65, 35.23, 7.71. HRMS (ESI<sup>+</sup>) for C<sub>10</sub>H<sub>12</sub>NaO<sub>2</sub> [M + Na]<sup>+</sup>: calcd 187.0730; found 187.0731.

### 1-(3-Hydroxyphenyl)-3-phenylpropan-2-one (5b)

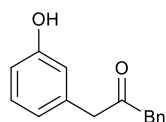

Following the general procedure A, benzocyclobutenol **1n** (56.1 mg, 0.2 mmol) was used. Purification by column chromatography on silica gel (petroleum ether : ethyl acetate = 20 : 1) afforded **5b** as a yellow liquid (24.0 mg, 53% yield).  $^1\text{H}$  NMR (400 MHz,  $\text{CDCl}_3$ )  $\delta$  7.34 – 7.24 (m, 3H), 7.19 – 7.14 (m, 3H), 6.74 – 6.69 (m, 2H), 6.63 – 6.62 (m, 1H), 3.73 (s, 2H), 3.67 (s, 2H).  $^{13}\text{C}$  NMR (151 MHz,  $\text{CDCl}_3$ )  $\delta$  206.89, 156.11, 135.23, 133.72, 129.93, 129.48, 128.72, 127.11, 121.65, 116.35, 114.33, 49.00, 48.92. HRMS (ESI $^+$ ) for  $\text{C}_{15}\text{H}_{14}\text{NaO}_2$  [ $\text{M} + \text{Na}$ ] $^+$ : calcd 249.0886; found 249.0885.

### 1-(3-Hydroxyphenyl)-3-methylbutan-2-one (5c)

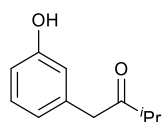

Following the general procedure A, benzocyclobutenol **1o** (46.5 mg, 0.2 mmol) was used. Purification by column chromatography on silica gel (petroleum ether : ethyl acetate = 20 : 1) afforded **5c** as a yellow liquid (26.9 mg, 76% yield).  $^1\text{H}$  NMR (400 MHz,  $\text{CDCl}_3$ )  $\delta$  7.16 (t,  $J = 7.8$  Hz, 1H), 6.74 – 6.69 (m, 3H), 6.36 (brs, 1H), 3.70 (s, 2H), 2.80 – 2.70 (m, 1H), 1.10 (s, 3H), 1.09 (s, 3H).  $^{13}\text{C}$  NMR (151 MHz,  $\text{CDCl}_3$ )  $\delta$  213.59, 156.17, 135.59, 129.80, 121.50, 116.32, 114.19, 47.60, 40.10, 18.29. HRMS (ESI $^+$ ) for  $\text{C}_{11}\text{H}_{14}\text{NaO}_2$  [ $\text{M} + \text{Na}$ ] $^+$ : calcd 201.0886; found 201.0885.

### 1-Cyclopropyl-2-(3-hydroxyphenyl)ethan-1-one (5d)

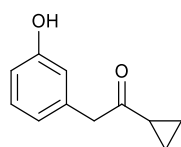

Following the general procedure A, benzocyclobutenol **1p** (46.1 mg, 0.2 mmol) was used. Purification by column chromatography on silica gel (petroleum ether : ethyl acetate = 20 : 1) afforded **5d** as a yellow liquid (20.6 mg, 59% yield).  $^1\text{H}$  NMR (400 MHz,  $\text{CDCl}_3$ )  $\delta$  7.17 (t,  $J = 7.8$  Hz, 1H), 6.79 – 6.66 (m, 3H), 3.77 (s, 2H), 2.03 – 1.97

(m, 1H), 1.09 – 1.03 (m, 2H), 0.91 – 0.86 (m, 2H). <sup>13</sup>C NMR (151 MHz, CDCl<sub>3</sub>) δ 210.20, 156.32, 135.54, 129.86, 121.53, 116.34, 114.26, 50.49, 20.30, 11.84. HRMS (ESI<sup>+</sup>) for C<sub>11</sub>H<sub>13</sub>O<sub>2</sub> [M + H]<sup>+</sup>: calcd 177.0910; found 177.0910.

### 2-(3-Hydroxyphenyl)-1-phenylethan-1-one (5e)

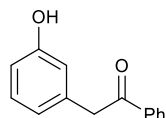

Following the general procedure A, benzocyclobutenol **1q** (53.3 mg, 0.2 mmol) was used. Purification by column chromatography on silica gel (petroleum ether : ethyl acetate = 20 : 1) afforded **5e** as a yellow liquid (11.6 mg, 27% yield) and **6a** (26.5 mg, 62%). <sup>1</sup>H NMR (400 MHz, CDCl<sub>3</sub>) δ 8.00 (d, *J* = 7.6 Hz, 2H), 7.56 (t, *J* = 7.4 Hz, 1H), 7.45 (t, *J* = 7.7 Hz, 2H), 7.18 (t, *J* = 7.8 Hz, 1H), 6.82 (d, *J* = 7.6 Hz, 1H), 6.76 – 6.72 (m, 2H), 5.51 (brs, 1H), 4.23 (s, 2H). <sup>13</sup>C NMR (151 MHz, CDCl<sub>3</sub>) δ 198.09, 155.94, 136.35, 135.98, 133.35, 129.90, 128.68, 128.67, 121.73, 116.35, 114.09, 45.35.

### (2-Hydroxy-6-methylphenyl)(phenyl)methanone (6a)

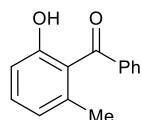

Following the general procedure B, benzocyclobutenol **1q** (53.3 mg, 0.2 mmol) was used. Purification by column chromatography on silica gel (petroleum ether : dichloromethane = 1 : 1) afforded **6a** as a light yellow liquid (38.5 mg, 91% yield). <sup>1</sup>H NMR (400 MHz, CDCl<sub>3</sub>) δ 8.62 (s, 1H), 7.71 (d, *J* = 7.5 Hz, 2H), 7.58 (t, *J* = 7.4 Hz, 1H), 7.46 (t, *J* = 7.7 Hz, 2H), 7.30 (t, *J* = 7.9 Hz, 1H), 6.87 (d, *J* = 8.3 Hz, 1H), 6.76 (d, *J* = 7.5 Hz, 1H), 2.00 (s, 3H). <sup>13</sup>C NMR (101 MHz, CDCl<sub>3</sub>) δ 201.01, 158.08, 139.67, 138.53, 133.01, 128.98, 128.69, 123.32, 122.77, 114.88, 22.23. HRMS (ESI<sup>+</sup>) for C<sub>14</sub>H<sub>13</sub>O<sub>2</sub> [M + H]<sup>+</sup>: calcd 213.0910; found 213.0910.

### (2,5-Dimethylphenyl)(2-hydroxy-6-methylphenyl)methanone (6b)

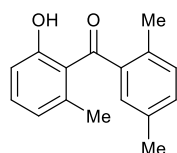

Following the general procedure B, benzocyclobutenol **1r** (58.9 mg, 0.2 mmol) was used. Purification by column chromatography on silica gel (petroleum ether : ethyl acetate = 20 : 1) afforded **6b** as a yellow solid (35.1 mg, 73% yield). M.p.: 96.7 – 97.1 °C. <sup>1</sup>H NMR (400 MHz, CDCl<sub>3</sub>) δ 11.08 (s, 1H), 7.32 (t, *J* = 7.9 Hz, 1H), 7.20 – 7.15 (m, 2H), 7.03 (s, 1H), 6.91 (d, *J* = 8.4 Hz, 1H), 6.67 (d, *J* = 7.4 Hz, 1H), 2.31 (s, 6H), 1.84 (s, 3H). <sup>13</sup>C NMR (101 MHz, CDCl<sub>3</sub>) δ 204.54, 161.61, 141.21, 140.15, 135.65, 134.66, 132.39, 131.45, 131.22, 127.97, 122.89, 122.05, 115.83, 22.62, 20.77, 19.19. Elemental Anal. for C<sub>16</sub>H<sub>16</sub>O<sub>2</sub>: calcd C 79.97%, H 6.71%, found C 79.59%, H 6.87%.

#### (2-Hydroxy-6-methylphenyl)(3-methoxyphenyl)methanone (**6c**)

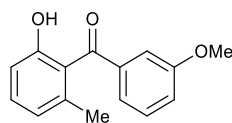

Following the general procedure B, benzocyclobutenol **1s** (59.3 mg, 0.2 mmol) was used. Purification by column chromatography on silica gel (petroleum ether : dichloromethane = 1 : 1) afforded **6c** as a yellow liquid (33.2 mg, 68% yield). <sup>1</sup>H NMR (600 MHz, CDCl<sub>3</sub>) δ 8.36 (s, 1H), 7.26 (t, *J* = 7.9 Hz, 1H), 7.22 – 7.18 (m, 2H), 7.16 (d, *J* = 7.6 Hz, 1H), 7.05 – 7.03 (m, 1H), 6.78 (d, *J* = 8.3 Hz, 1H), 6.68 (d, *J* = 7.5 Hz, 1H), 3.76 (s, 3H), 1.95 (s, 3H). <sup>13</sup>C NMR (151 MHz, CDCl<sub>3</sub>) δ 200.64, 159.87, 157.73, 140.84, 138.47, 132.84, 129.71, 123.64, 122.74, 121.92, 119.44, 114.75, 112.96, 55.45, 21.90. HRMS (ESI<sup>+</sup>) for C<sub>15</sub>H<sub>15</sub>O<sub>3</sub> [M + H]<sup>+</sup>: calcd 243.1016; found 243.1017.

#### (2-Hydroxy-6-methylphenyl)(4-methoxyphenyl)methanone (**6d**)

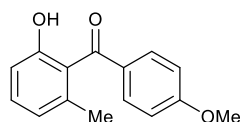

Following the general procedure B, benzocyclobutenol **1t** (59.3 mg, 0.2 mmol) was

used. Purification by column chromatography on silica gel (petroleum ether : dichloromethane = 1 : 3) afforded **6d** as a yellow liquid (17.2 mg, 35% yield). <sup>1</sup>H NMR (400 MHz, CDCl<sub>3</sub>) δ 8.03 (s, 1H), 7.73 (d, *J* = 8.8 Hz, 2H), 7.26 (t, *J* = 7.9 Hz, 1H), 6.93 (d, *J* = 8.8 Hz, 2H), 6.84 (d, *J* = 8.2 Hz, 1H), 6.77 (d, *J* = 7.5 Hz, 1H), 3.87 (s, 3H), 2.05 (s, 3H). <sup>13</sup>C NMR (151 MHz, CDCl<sub>3</sub>) δ 198.89, 163.82, 156.90, 137.88, 132.17, 131.88, 131.77, 124.27, 122.62, 114.58, 113.94, 55.50, 21.71. HRMS (ESI<sup>+</sup>) for C<sub>15</sub>H<sub>15</sub>O<sub>3</sub> [M + H]<sup>+</sup>: calcd 243.1016; found 243.1013.

### (2-Hydroxy-6-methylphenyl)(thiophen-2-yl)methanone (**6e**)

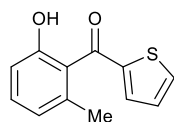

Following the general procedure B, benzocyclobutenol **1u** (54.5 mg, 0.2 mmol) was used. Purification by column chromatography on silica gel (petroleum ether : dichloromethane = 1 : 4) afforded **6e** as a colorless liquid (18.0 mg, 41% yield). <sup>1</sup>H NMR (400 MHz, CDCl<sub>3</sub>) δ 7.73 (d, *J* = 4.9 Hz, 1H), 7.46 (d, *J* = 3.7 Hz, 1H), 7.24 (t, *J* = 8.0 Hz, 1H), 7.20 – 7.02 (m, 2H), 6.80 (d, *J* = 7.9 Hz, 2H), 2.21 (s, 3H). <sup>13</sup>C NMR (151 MHz, CDCl<sub>3</sub>) δ 191.13, 155.28, 144.70, 137.18, 135.37, 135.24, 131.78, 128.28, 125.39, 122.80, 114.32, 20.96. HRMS (ESI<sup>+</sup>) for C<sub>12</sub>H<sub>11</sub>O<sub>2</sub>S [M + H]<sup>+</sup>: calcd 219.0474; found 219.0475.

## VII. Control experiments

### i. The reaction of different benzocyclobutenols in the presence of K<sub>3</sub>PO<sub>4</sub>

To an oven-dried Schlenk tube with a stirring bar was added K<sub>3</sub>PO<sub>4</sub> (21.2 mg, 0.1 mmol) and benzocyclobutenols. The tube was evacuated and backfilled with N<sub>2</sub> for three times. 1,4-Dioxane (1.0 mL) was then added. The tube was heated at 110 °C for 2 h. The mixture was quenched with saturated aqueous NH<sub>4</sub>Cl solution and extracted with EtOAc for three times. The combined organic phases were washed with brine and dried over anhydrous MgSO<sub>4</sub>. The solvent was evaporated and the residue was purified by column chromatography on silica gel to afford the ring-opening products.

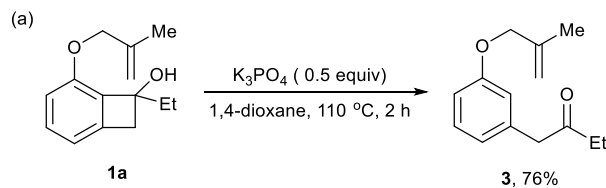

Benzocyclobutenol **1a** (43.7 mg, 0.2 mmol) was used and the reaction time was 2 h. Purification by column chromatography on silica gel (petroleum ether : ethyl acetate = 50 : 1) afforded **3** as a yellow liquid (33.1 mg, 76% yield).  $^1\text{H}$  NMR (400 MHz,  $\text{CDCl}_3$ )  $\delta$  7.22 (t,  $J = 7.8$  Hz, 1H), 6.83 – 6.78 (m, 3H), 5.09 (s, 1H), 4.98 (s, 1H), 4.41 (s, 2H), 3.64 (s, 2H), 2.47 (q,  $J = 7.3$  Hz, 2H), 1.83 (s, 3H), 1.02 (t,  $J = 7.3$  Hz, 3H).  $^{13}\text{C}$  NMR (151 MHz,  $\text{CDCl}_3$ )  $\delta$  208.97, 158.96, 140.78, 135.84, 129.61, 121.81, 115.82, 113.18, 112.73, 71.60, 49.87, 35.09, 19.42, 7.73.

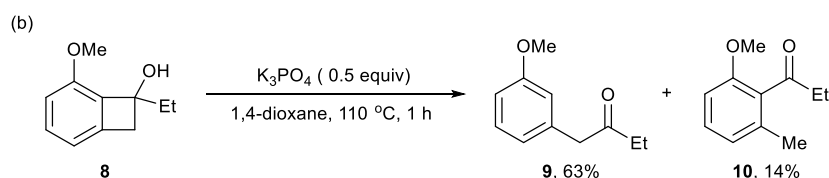

Benzocyclobutenol **8** (35.6 mg, 0.2 mmol) was used and the reaction time was 1h. Purification by column chromatography on silica gel (petroleum ether : ethyl acetate = 50 : 1) afforded **9** (22.5 mg) in 63% yield and **10** (5.1 mg) in 14% yield.

### 1-(3-Methoxyphenyl)butan-2-one (**9**)

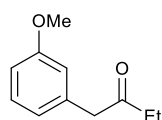

$^1\text{H}$  NMR (400 MHz,  $\text{CDCl}_3$ )  $\delta$  7.23 (t,  $J = 8.0$  Hz, 1H), 6.82 – 6.78 (m, 2H), 6.75 – 6.74 (m, 1H), 3.79 (s, 3H), 3.65 (s, 2H), 2.47 (q,  $J = 7.3$  Hz, 2H), 1.02 (t,  $J = 7.3$  Hz, 3H).  $^{13}\text{C}$  NMR (151 MHz,  $\text{CDCl}_3$ )  $\delta$  208.88, 159.77, 135.89, 129.63, 121.69, 114.95, 112.39, 55.14, 49.85, 35.08, 7.72.

### 1-(2-Methoxy-6-methylphenyl)propan-1-one (**10**)

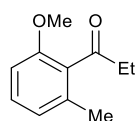

$^1\text{H}$  NMR (400 MHz,  $\text{CDCl}_3$ )  $\delta$  7.20 (t,  $J = 8.0$  Hz, 1H), 6.79 (d,  $J = 7.6$  Hz, 1H), 6.74

(d,  $J = 8.3$  Hz, 1H), 3.79 (s, 3H), 2.77 (q,  $J = 7.3$  Hz, 2H), 2.20 (s, 3H), 1.16 (t,  $J = 7.3$  Hz, 3H).  $^{13}\text{C}$  NMR (101 MHz,  $\text{CDCl}_3$ )  $\delta$  208.94, 155.93, 135.20, 131.33, 129.55, 122.77, 108.15, 55.52, 37.72, 18.87, 7.78.

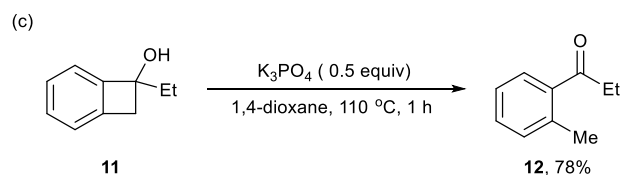

Benzocyclobutenol **11** (29.6 mg, 0.2 mmol) was used and the reaction time was 1h. Purification by column chromatography on silica gel (petroleum ether : dichloromethane = 5 : 1) afforded ketone **12** as a colorless liquid (23.0 mg, 78% yield).  $^1\text{H}$  NMR (600 MHz,  $\text{CDCl}_3$ )  $\delta$  7.65 (d,  $J = 7.7$  Hz, 1H), 7.38 (t,  $J = 7.5$  Hz, 1H), 7.28 (d,  $J = 6.5$  Hz, 2H), 2.94 (q,  $J = 7.3$  Hz, 2H), 2.51 (s, 3H), 1.22 (t,  $J = 7.3$  Hz, 3H).  $^{13}\text{C}$  NMR (151 MHz,  $\text{CDCl}_3$ )  $\delta$  205.15, 138.09, 137.83, 131.86, 131.02, 128.22, 125.61, 34.72, 21.24, 8.36.

## ii. The reaction of ketone **3** under standard conditions

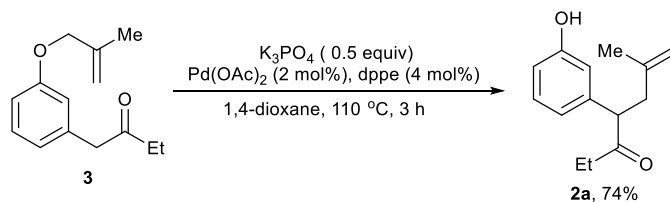

Following the general procedure A, ketone **3** (43.7 mg, 0.2 mmol) was used as the substrate. Purification by column chromatography on silica gel (petroleum ether : ethyl acetate = 20 : 1) afforded **2a** (32.5 mg) in 74% yield.

## iii. The reaction of ketone **3** at $80^\circ\text{C}$

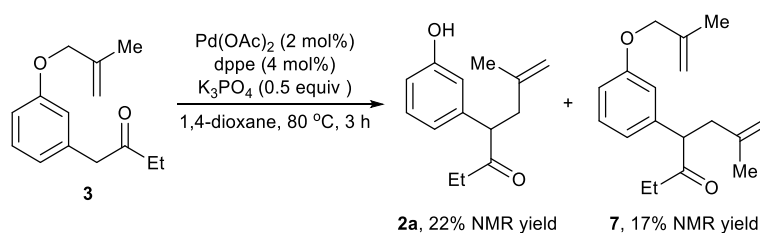

Following the general procedure A except that the reaction temperature was 80 °C, ketone **3a** (43.7 mg, 0.2 mmol) was used. The NMR yields of compound **2a** and **7** were 22% and 17%, respectively.

#### 6-Methyl-4-(3-((2-methylallyl)oxy)phenyl)hept-6-en-3-one (**7**)

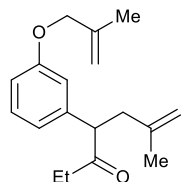

$^1\text{H}$  NMR (400 MHz,  $\text{CDCl}_3$ )  $\delta$  7.21 (t,  $J = 7.7$  Hz, 1H), 6.81 – 6.79 (m, 3H), 5.09 (s, 1H), 4.98 (s, 1H), 4.69 (s, 1H), 4.59 (s, 1H), 4.41 (s, 2H), 3.84 (t,  $J = 7.4$  Hz, 1H), 2.81 (dd,  $J = 14.8, 7.8$  Hz, 1H), 2.51 – 2.30 (m, 3H), 1.83 (s, 3H), 1.67 (s, 3H), 0.96 (t,  $J = 7.3$  Hz, 3H).  $^{13}\text{C}$  NMR (151 MHz,  $\text{CDCl}_3$ )  $\delta$  210.28, 159.00, 143.10, 140.77, 140.39, 129.65, 120.76, 114.66, 113.32, 112.79, 111.85, 71.63, 56.89, 39.86, 35.04, 22.82, 19.44, 7.82. HRMS (ESI $^+$ ) for  $\text{C}_{18}\text{H}_{24}\text{NaO}_2$   $[\text{M} + \text{Na}]^+$ : calcd 295.1669; found 295.1671.

#### iv. The cross-over experiment

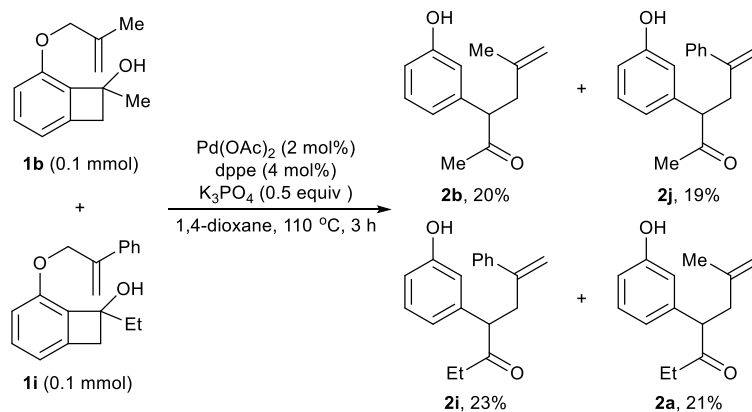

Following the general procedure A, benzocyclobutenols **1b** (21.8 mg, 0.1 mmol) and **1i** (28.0 mg, 0.1 mmol) were used as the substrates. After workup, the crude product was analyzed by  $^1\text{H}$  NMR spectrometer. It was found that compounds **2a**, **2b**, **2i** and **2j** were formed in a ratio of around 1:1:1:1.



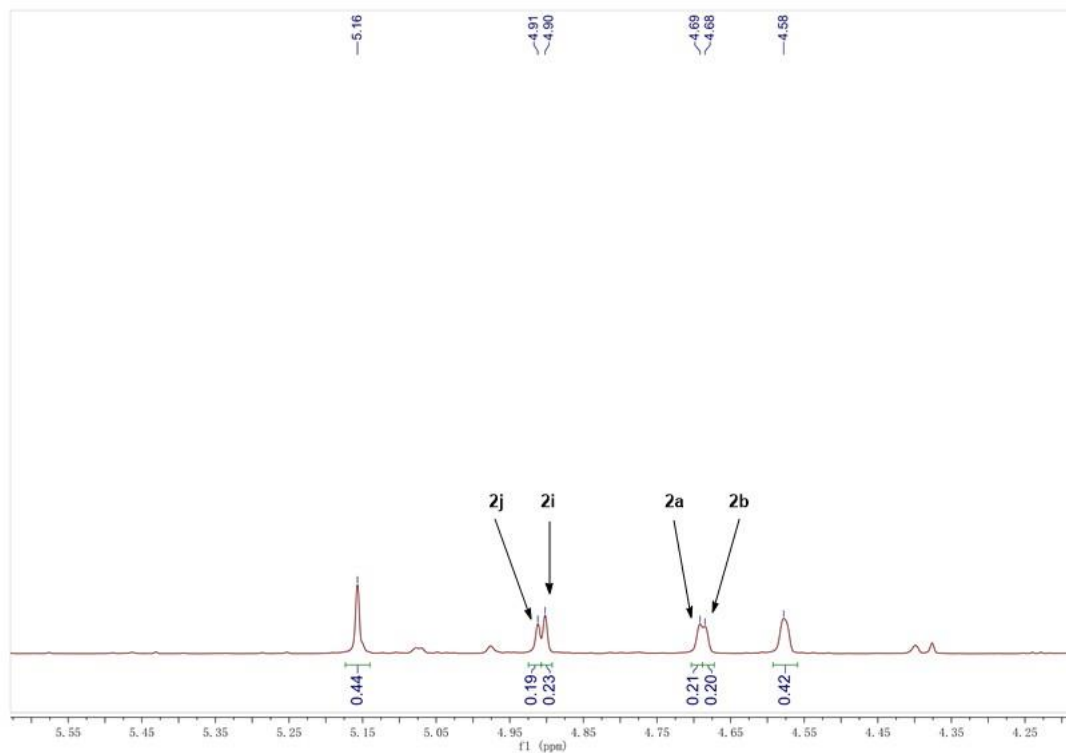

## VIII. Mechanistic studies by DFT calculations

### i. Computational details

All of the calculations were performed with the Gaussian 09 package<sup>7</sup> using B3LYP-D3(BJ) functional.<sup>8</sup> Geometry optimizations were carried out with the def2-SVP<sup>9</sup> basis set. Vibrational frequencies were computed analytically at the same level of theory to confirm whether the structures are minima (no imaginary frequencies) or transition states (only one imaginary frequency). Selected key transition-state structures were confirmed to connect corresponding reactants and products by intrinsic reaction coordinate (IRC) calculations.<sup>10</sup> To obtain better accuracy, energies of the optimized geometries were recalculated using the def2-TZVPP<sup>11</sup> basis set. Solvation effects (1,4-dioxane,  $\epsilon = 2.2099$ ) were taken into account using the PCM model<sup>12</sup> with UFF radii in the single-point calculations. The final Gibbs free energies reported in the article are the single-point energies with Gibbs free energy correction (at 298.15 K).

### ii. Key transition states of the C–C bond cleavage

To gain deeper insights into the origins of the substituent-controlled selectivity,

preliminary mechanistic studies were performed by means of density functional theory calculations. Starting from the oxy-anionic intermediates generated *via* the deprotonation of the OH group by  $K_3PO_4$ , the key transition states of the proximal and distal C–C bond cleavage were located. The computations show that for the reaction of  $\alpha$ -methyl substituted benzocyclobutenol, the proximal C–C bond cleavage is more favored than the distal C–C bond cleavage by 1.1 kcal/mol. On the other hand, for the reaction of  $\alpha$ -phenyl substituted benzocyclobutenol, the distal C–C bond cleavage is preferred by 1.0 kcal/mol compared with the proximal C–C bond cleavage. Although the calculated energy differences are somewhat underestimated compared to the experiments, the computations indeed reproduced quite well the selectivity switch upon change of the substituent.

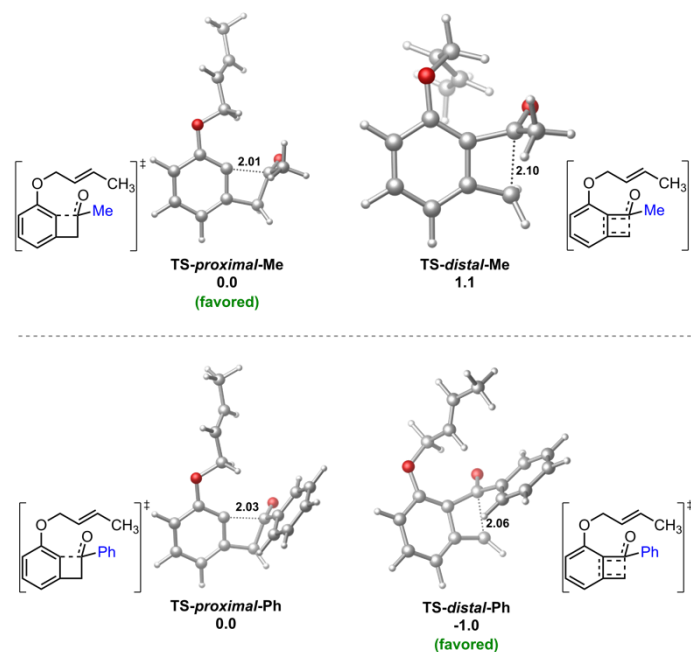

**Figure S8.** Calculated energies of the proximal and distal C–C bond cleavage. Energies and bond distances are given in kcal/mol and Å, respectively.

### iii. Cartesian coordinates and energies

#### TS-*proximal*-Me

E= -655.1608259

Thermal correction to Gibbs free energy = 0.201389

|   |             |             |            |
|---|-------------|-------------|------------|
| C | -6.38142800 | -0.22226200 | 2.67312600 |
| C | -5.57580400 | -0.73631500 | 1.64280300 |

|   |             |             |             |
|---|-------------|-------------|-------------|
| C | -4.59843500 | 0.10773000  | 1.10436600  |
| C | -4.38059800 | 1.41223700  | 1.56268000  |
| C | -5.22045500 | 1.90719400  | 2.55736300  |
| C | -6.21728800 | 1.09234000  | 3.12830300  |
| H | -7.15984100 | -0.84848900 | 3.12310300  |
| H | -5.73143800 | -1.75752900 | 1.27643400  |
| H | -6.85762000 | 1.49681000  | 3.91956600  |
| O | -5.12886800 | 3.20313900  | 3.01440600  |
| C | -4.09251900 | 3.97176300  | 2.41910500  |
| H | -4.08980000 | 3.86634800  | 1.32008400  |
| H | -3.10838200 | 3.58445600  | 2.75367400  |
| C | -4.26174400 | 5.39501900  | 2.84891000  |
| C | -4.21038300 | 6.44758600  | 2.02554400  |
| H | -4.41946900 | 5.55280600  | 3.92511400  |
| H | -4.06521100 | 6.25981100  | 0.95352700  |
| C | -4.32906700 | 7.88383700  | 2.44375500  |
| H | -5.17385600 | 8.38420600  | 1.93596400  |
| H | -4.48322700 | 7.97749100  | 3.53083800  |
| H | -3.42383200 | 8.46078700  | 2.17893300  |
| C | -2.92914400 | 1.40307700  | 0.17861400  |
| C | -3.61561500 | -0.01146500 | -0.03003600 |
| O | -2.94403000 | 2.26333300  | -0.72675700 |
| H | -4.09988700 | -0.00810700 | -1.02139600 |
| H | -2.91518800 | -0.87036600 | 0.01360700  |
| C | -1.67475200 | 1.32330700  | 1.07185600  |
| H | -0.82276300 | 0.99104000  | 0.44512300  |
| H | -1.43622300 | 2.33019900  | 1.44767100  |
| H | -1.78627300 | 0.63425600  | 1.92380200  |

**TS-distal-Me**

E= -655.1604541

Thermal correction to Gibbs free energy = 0.202796

|   |             |             |             |
|---|-------------|-------------|-------------|
| C | -6.25953900 | 0.58122400  | 2.76907300  |
| C | -5.71207600 | 0.51361000  | 1.48142700  |
| C | -4.67868200 | 1.40805500  | 1.15789700  |
| C | -4.12910000 | 2.25536500  | 2.14115600  |
| C | -4.72344100 | 2.37461500  | 3.40356600  |
| C | -5.80036200 | 1.51695600  | 3.70524200  |
| H | -7.07925800 | -0.08954400 | 3.05013900  |
| H | -6.10005800 | -0.19523600 | 0.74243000  |
| H | -6.24166700 | 1.58302800  | 4.70313500  |
| O | -4.29425400 | 3.18342300  | 4.42461500  |
| C | -3.79009200 | 4.48504600  | 4.07835200  |
| H | -2.97739500 | 4.41094600  | 3.34036400  |
| H | -3.39306200 | 4.87853400  | 5.02906800  |
| C | -4.87487100 | 5.37051900  | 3.53617800  |
| C | -4.95568600 | 5.68638300  | 2.23709900  |
| H | -5.65951800 | 5.68866300  | 4.23888700  |
| H | -4.16793800 | 5.28541400  | 1.57862500  |
| C | -6.05675200 | 6.49543500  | 1.62210300  |
| H | -6.58893000 | 5.90608800  | 0.85387000  |
| H | -6.79578000 | 6.83080500  | 2.36926000  |
| H | -5.66072600 | 7.38823900  | 1.10394000  |
| C | -2.82670200 | 2.72028800  | 1.47292800  |
| C | -3.85934000 | 1.67299400  | -0.03287500 |
| O | -2.54434800 | 3.93643400  | 1.27739700  |
| H | -4.12365300 | 2.59419500  | -0.56758100 |
| H | -3.64021500 | 0.83727000  | -0.72185600 |
| C | -1.65638500 | 1.77085600  | 1.77066700  |
| H | -0.86203900 | 1.94052700  | 1.02677200  |

|   |             |            |            |
|---|-------------|------------|------------|
| H | -1.23773300 | 2.01956300 | 2.76745400 |
| H | -1.95071200 | 0.71096400 | 1.76683200 |

**TS-proximal-Ph**

E= -846.9922855

Thermal correction to Gibbs free energy = 0.250006

|   |             |             |             |
|---|-------------|-------------|-------------|
| C | -6.34851200 | -0.26276200 | 2.68711500  |
| C | -5.52646700 | -0.79095200 | 1.67735200  |
| C | -4.58894300 | 0.06917800  | 1.09525600  |
| C | -4.43510100 | 1.40034100  | 1.49145800  |
| C | -5.26888100 | 1.90511500  | 2.48593200  |
| C | -6.23148800 | 1.07359600  | 3.09069000  |
| H | -7.09886200 | -0.89932300 | 3.16836700  |
| H | -5.63516800 | -1.83517200 | 1.36409200  |
| H | -6.87746200 | 1.48146100  | 3.87515200  |
| O | -5.19568100 | 3.20749300  | 2.91201300  |
| C | -4.14629400 | 3.96660300  | 2.31993700  |
| H | -4.18890700 | 3.91580400  | 1.21780700  |
| H | -3.16944900 | 3.52725700  | 2.59975300  |
| C | -4.24687100 | 5.37257100  | 2.81917500  |
| C | -4.19142300 | 6.46030400  | 2.04332200  |
| H | -4.34694700 | 5.48464900  | 3.90764000  |
| H | -4.10177900 | 6.31898000  | 0.95808700  |
| C | -4.22999100 | 7.87853700  | 2.53164100  |
| H | -5.07246000 | 8.43758900  | 2.08498900  |
| H | -4.33348100 | 7.92631800  | 3.62753900  |
| H | -3.31185400 | 8.42821200  | 2.25403100  |
| C | -2.94185000 | 1.36753400  | 0.11937600  |
| C | -3.57480200 | -0.07067900 | -0.00851900 |
| O | -2.96892700 | 2.15924500  | -0.84695700 |

|   |             |             |             |
|---|-------------|-------------|-------------|
| C | -1.76778600 | 1.48082600  | 1.09432200  |
| C | -0.91104000 | 2.57989200  | 0.93317500  |
| C | -1.48155400 | 0.56260800  | 2.12039500  |
| C | 0.18190200  | 2.77603700  | 1.78104900  |
| H | -1.14960100 | 3.26035400  | 0.11267600  |
| C | -0.38324500 | 0.74838400  | 2.96139800  |
| H | -2.14436200 | -0.28978200 | 2.28201600  |
| C | 0.45473100  | 1.86002400  | 2.80180600  |
| H | 0.83080500  | 3.64738200  | 1.64270500  |
| H | -0.18143000 | 0.02329300  | 3.75643800  |
| H | 1.31055700  | 2.00770500  | 3.46742600  |
| H | -4.03103800 | -0.13126900 | -1.01021700 |
| H | -2.85008500 | -0.90178500 | 0.09131400  |

**TS-distal-Ph**

E= -846.9938628

Thermal correction to Gibbs free energy = 0.250113

|   |             |            |            |
|---|-------------|------------|------------|
| C | -6.59214900 | 0.68035100 | 2.47547000 |
| C | -5.94528600 | 0.67133200 | 1.22621900 |
| C | -4.75027300 | 1.38531900 | 1.14608900 |
| C | -4.18870800 | 2.04403900 | 2.24149300 |
| C | -4.85859400 | 2.10280500 | 3.46624100 |
| C | -6.07061000 | 1.38516700 | 3.56797900 |
| H | -7.53554300 | 0.13884400 | 2.60299300 |
| H | -6.37928300 | 0.14243200 | 0.37224400 |
| H | -6.59685900 | 1.39566500 | 4.52657500 |
| O | -4.44673300 | 2.79281100 | 4.56074100 |
| C | -3.21926500 | 3.53409800 | 4.45200200 |
| H | -3.34780400 | 4.42619900 | 5.08704600 |
| H | -3.05332900 | 3.86432900 | 3.40154600 |

|   |             |             |             |
|---|-------------|-------------|-------------|
| C | -2.05409300 | 2.72111500  | 4.92375300  |
| C | -1.12328700 | 3.13531100  | 5.78965400  |
| H | -1.94948500 | 1.73614400  | 4.45753000  |
| H | -1.22766200 | 4.13189600  | 6.24260000  |
| C | 0.10413700  | 2.35419900  | 6.15805000  |
| H | 0.17446000  | 2.18495400  | 7.24890300  |
| H | 0.11952900  | 1.37887000  | 5.64822800  |
| H | 1.02352200  | 2.89252100  | 5.86287700  |
| C | -2.90493700 | 2.53384300  | 1.43460800  |
| C | -3.67897600 | 1.79881700  | 0.16282900  |
| O | -2.65108600 | 3.80870900  | 1.37308500  |
| C | -1.68290900 | 1.65516300  | 1.83993800  |
| C | -0.45563700 | 2.31587000  | 1.96255300  |
| C | -1.73281800 | 0.28085800  | 2.12079200  |
| C | 0.69435400  | 1.63277300  | 2.36502700  |
| H | -0.48695000 | 3.38832000  | 1.75032400  |
| C | -0.58642100 | -0.40879200 | 2.52851600  |
| H | -2.68571000 | -0.25016400 | 2.04456500  |
| C | 0.63480100  | 0.26510500  | 2.65623500  |
| H | 1.64410500  | 2.16896200  | 2.46689300  |
| H | -0.64588400 | -1.47821100 | 2.75659800  |
| H | 1.53023200  | -0.27250400 | 2.98338100  |
| H | -3.99554600 | 2.59727800  | -0.52521700 |
| H | -3.15487800 | 0.99989600  | -0.39115600 |

## IX. Synthetic applications

### i. Reaction of compound 2i with phenyl lithium<sup>13</sup>

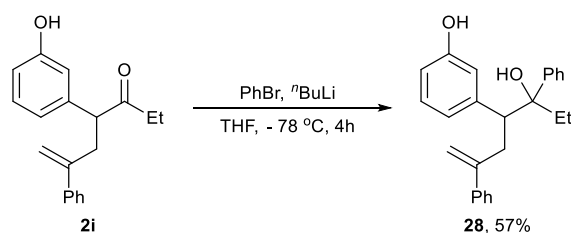

$t$ -BuLi (1.6 M in hexane, 0.28 mL, 0.4 mmol) was added dropwise to the solution of bromobenzene (46.0  $\mu$ L, 0.4 mmol) in THF (1.0 mL) at  $-78$   $^{\circ}$ C. After stirring at  $-78$   $^{\circ}$ C for 1 h, a solution of **2i** (56.1 mg, 0.2 mmol) in THF (1.0 mL) was added dropwise. The reaction solution was stirred at  $-78$   $^{\circ}$ C for another 4 h and then quenched with saturated aqueous  $\text{NH}_4\text{Cl}$  solution. The aqueous phase was extracted with EtOAc for three times. The combined organic phases were washed with brine, dried over anhydrous  $\text{MgSO}_4$ , filtered, and evaporated. The residue was purified by column chromatography on silica gel (petroleum ether : ethyl acetate = 20 : 1) to afford **28** as a yellow liquid (40.8 mg, 57% yield).  $^1\text{H}$  NMR (400 MHz,  $\text{CDCl}_3$ )  $\delta$  7.43 – 7.42 (m, 4H), 7.36 – 7.30 (m, 1H), 7.24 – 7.12 (m, 4H), 6.87 – 6.85 (m, 2H), 6.75 – 6.70 (m, 3H), 5.61 (brs, 1H), 4.89 (s, 1H), 4.67 (s, 1H), 2.94 (dd,  $J$  = 11.4, 2.6 Hz, 1H), 2.82 – 2.75 (m, 1H), 2.69 (d,  $J$  = 13.8 Hz, 1H), 1.92 (brs, 1H), 1.75 – 1.65 (m, 1H), 1.36 – 1.26 (m, 1H), 0.49 (t,  $J$  = 7.4 Hz, 3H).  $^{13}\text{C}$  NMR (151 MHz,  $\text{CDCl}_3$ )  $\delta$  155.32, 146.59, 144.48, 142.31, 140.75, 129.03, 128.07, 127.92, 127.05, 126.48, 126.42, 125.83, 114.46, 113.63, 79.91, 54.93, 35.91, 34.54, 7.60. HRMS ( $\text{ESI}^+$ ) for  $\text{C}_{25}\text{H}_{26}\text{NaO}_2$  [ $\text{M} + \text{Na}$ ] $^+$ : calcd 381.1825; found 381.1828.

## ii. Cyclopropanation of **2i**<sup>14</sup>

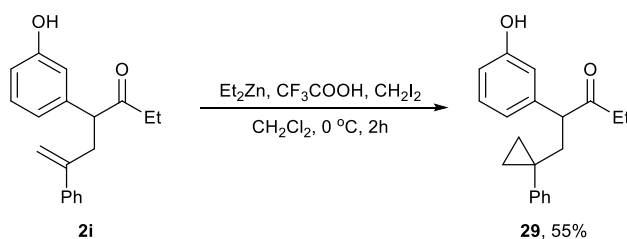

$\text{CF}_3\text{CO}_2\text{H}$  (22.0  $\mu$ L, 0.30 mmol) was added to a solution of  $\text{Et}_2\text{Zn}$  (1.0 M in hexane, 0.3 mL, 0.3 mmol) in  $\text{CH}_2\text{Cl}_2$  (1.0 mL) at  $0$   $^{\circ}$ C. After stirring at  $0$   $^{\circ}$ C for 20 min,  $\text{CH}_2\text{I}_2$  (24.0  $\mu$ L, 0.3 mmol) was added dropwise and the resulting solution was stirred at  $0$   $^{\circ}$ C for another 20 min. A solution of **2i** (28.0 mg, 0.1 mmol) in  $\text{CH}_2\text{Cl}_2$  (1.0 mL)



was then added dropwise. After stirring at 0 °C for 2 h, **2i** was completely consumed as monitored by TLC. The reaction mixture was quenched with aqueous 3 M HCl solution. The aqueous phase was extracted with EtOAc for three times. The combined organic phases were washed with saturated NaHCO<sub>3</sub> solution and brine, dried over anhydrous MgSO<sub>4</sub>, filtered, and evaporated. The residue was purified by column chromatography on silica gel (petroleum ether : ethyl acetate = 20 : 1) to afford **29** as a colorless liquid (16.2 mg, 55% yield). <sup>1</sup>H NMR (400 MHz, CDCl<sub>3</sub>) δ 7.36 – 7.13 (m, 6H), 6.75 – 6.66 (m, 3H), 6.04 (brs, 1H), 3.61 (t, *J* = 6.8 Hz, 1H), 2.60 (dd, *J* = 14.2, 7.4 Hz, 1H), 2.39 – 2.17 (m, 2H), 1.86 (dd, *J* = 14.3, 6.2 Hz, 1H), 0.86 (t, *J* = 7.2 Hz, 3H), 0.70 – 0.68 (m, 3H), 0.44 – 0.42 (m, 1H). <sup>13</sup>C NMR (151 MHz, CDCl<sub>3</sub>) δ 212.25, 156.26, 144.27, 141.15, 129.89, 128.99, 128.30, 126.19, 120.86, 114.61, 114.28, 56.31, 42.55, 35.48, 24.20, 12.89, 12.84, 7.74. HRMS (ESI<sup>+</sup>) for C<sub>20</sub>H<sub>22</sub>NaO<sub>2</sub> [M + Na]<sup>+</sup>: calcd 317.1512; found 317.1516.

### iii. Intramolecular cyclization of **2i**<sup>15</sup>

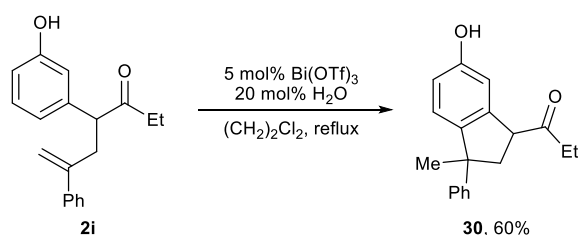

To an oven-dried Schlenk tube with a stirring bar was successively added **2i** (28.0 mg, 0.1 mmol) and Bi(OTf)<sub>3</sub> (3.3 mg, 5.0 μmol). The tube was then evacuated and backfilled with N<sub>2</sub> for three times. H<sub>2</sub>O (0.36 μL, 0.02 mmol) and 1,2-dichloroethane (1.0 mL) was then added. The tube was heated to reflux and stirred for 3.5 h. The mixture was quenched with ice water and extracted with Et<sub>2</sub>O for three times. The combined organic phases were washed with brine and dried over anhydrous MgSO<sub>4</sub>. The solvent was evaporated and the residue was purified by column chromatography on silica gel (petroleum ether : ethyl acetate = 20 : 1) to afford the desired product **30** as a yellow liquid (16.8 mg, 60% yield, 1.5:1 d. r.). <sup>1</sup>H NMR (400 MHz, CDCl<sub>3</sub>) δ 7.40 – 7.22<sup>+</sup> (m, 4H, 4H\*), 7.17 – 7.11 (m, 2 H, 2H\*), 6.92 – 6.77<sup>+</sup> (m, 2 H, 2H\*), 4.24\* (t, *J* = 8.3 Hz, 1H), 4.06 (t, *J* = 8.0 Hz, 1H), 2.77 – 2.46<sup>+</sup> (m, 4H, 4H\*), 1.82 (s,

3H), 1.69\* (s, 3H), 1.18 (t,  $J = 7.3$  Hz, 3H), 1.09\* (t,  $J = 7.2$  Hz, 3H).  $^{13}\text{C}$  NMR (151 MHz,  $\text{CDCl}_3$ )  $\delta$  212.67, 212.58\*, 155.31, 155.22\*, 148.63\*, 148.56, 143.95\*, 142.28, 142.19, 141.57\*, 128.13<sup>+</sup>, 126.88\*, 126.25, 126.07\*, 125.98, 125.51\*, 125.37, 115.41\*, 115.18, 111.72\*, 111.61, 55.92\*, 55.09, 50.96\*, 50.66, 48.16\*, 47.84, 34.79, 34.02\*, 28.54, 27.56\*, 7.85<sup>+</sup>. HRMS ( $\text{ESI}^+$ ) for  $\text{C}_{19}\text{H}_{20}\text{NaO}_2$   $[\text{M} + \text{Na}]^+$ : calcd 303.1356; found 303.1363.

## X. X-ray data of compounds 2f, 2g and 6b

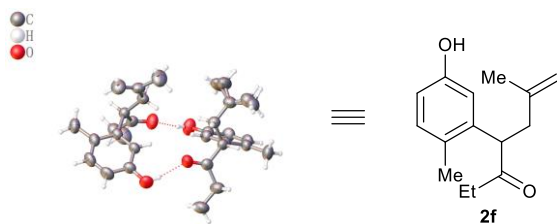

Crystal data and structure refinement for compound **2f**:

|                                   |                                                               |                    |
|-----------------------------------|---------------------------------------------------------------|--------------------|
| Empirical formula                 | C <sub>15</sub> H <sub>20</sub> O <sub>2</sub>                |                    |
| Formula weight                    | 232.31                                                        |                    |
| Temperature                       | 293.26 (10) K                                                 |                    |
| Wavelength                        | 1.54184                                                       |                    |
| Crystal system                    | monoclinic                                                    |                    |
| Space group                       | P2 <sub>1</sub> /c                                            |                    |
| Unit cell dimensions              | a = 23.7772 (3) Å                                             | α = 90°            |
|                                   | b = 7.7804 (1) Å                                              | β = 102.3770 (10)° |
|                                   | c = 15.2918 (2) Å                                             | γ = 90°            |
| Volume                            | 2763.17(6) Å <sup>3</sup>                                     |                    |
| Z                                 | 8                                                             |                    |
| Density (calculated)              | 1.117 g/cm <sup>3</sup>                                       |                    |
| Absorption coefficient            | 0.570 mm <sup>-1</sup>                                        |                    |
| F(000)                            | 1008.0                                                        |                    |
| Theta range for data collection   | 11.43 to 152.112°                                             |                    |
| Index ranges                      | -29 ≤ h ≤ 29, -8 ≤ k ≤ 9, -19 ≤ l ≤ 14                        |                    |
| Reflections collected             | 25147                                                         |                    |
| Independent reflections           | 5500 [R <sub>int</sub> = 0.0194, R <sub>sigma</sub> = 0.0126] |                    |
| Data/restraints/parameters        | 5500/97/335                                                   |                    |
| Goodness-of-fit on F <sup>2</sup> | 1.028                                                         |                    |
| Final R indexes [I >= 2σ (I)]     | R <sub>1</sub> = 0.0462, wR <sub>2</sub> = 0.1280             |                    |
| Final R indexes [all data]        | R <sub>1</sub> = 0.0497, wR <sub>2</sub> = 0.1311             |                    |

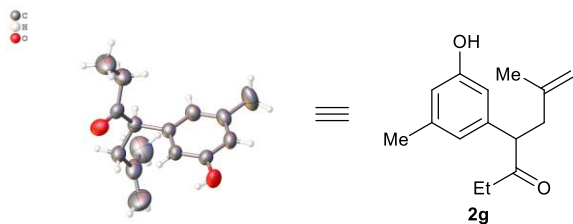

Crystal data and structure refinement for compound **2g**:

|                                   |                                                               |                    |
|-----------------------------------|---------------------------------------------------------------|--------------------|
| Empirical formula                 | C <sub>15</sub> H <sub>20</sub> O <sub>2</sub>                |                    |
| Formula weight                    | 230.29                                                        |                    |
| Temperature                       | 294.09 (10) K                                                 |                    |
| Wavelength                        | 1.54184                                                       |                    |
| Crystal system                    | monoclinic                                                    |                    |
| Space group                       | C2/c                                                          |                    |
| Unit cell dimensions              | a = 24.5707 (3) Å                                             | α = 90°            |
|                                   | b = 7.8487 (10) Å                                             | β = 106.1310 (10)° |
|                                   | c = 15.3888 (2) Å                                             | γ = 90°            |
| Volume                            | 2850.86 (6) Å <sup>3</sup>                                    |                    |
| Z                                 | 8                                                             |                    |
| Density (calculated)              | 1.073 g/cm <sup>3</sup>                                       |                    |
| Absorption coefficient            | 0.552 mm <sup>-1</sup>                                        |                    |
| F(000)                            | 992.0                                                         |                    |
| Theta range for data collection   | 11.974 to 152.206°                                            |                    |
| Index ranges                      | -26 ≤ h ≤ 30, -9 ≤ k ≤ 9, -19 ≤ l ≤ 19                        |                    |
| Reflections collected             | 26256                                                         |                    |
| Independent reflections           | 2893 [R <sub>int</sub> = 0.0212, R <sub>sigma</sub> = 0.0089] |                    |
| Data/restraints/parameters        | 2893/0/166                                                    |                    |
| Goodness-of-fit on F <sup>2</sup> | 0.950                                                         |                    |
| Final R indexes [I >= 2σ (I)]     | R <sub>1</sub> = 0.0465, wR <sub>2</sub> = 0.1550             |                    |
| Final R indexes [all data]        | R <sub>1</sub> = 0.0483, wR <sub>2</sub> = 0.1578             |                    |

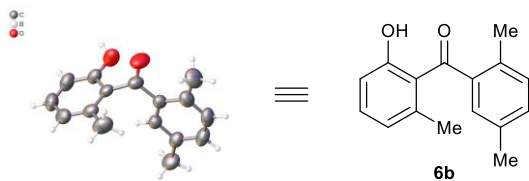

Crystal data and structure refinement for compound **6b**:

|                                         |                                                               |                     |
|-----------------------------------------|---------------------------------------------------------------|---------------------|
| Empirical formula                       | $C_{16}H_{16}O_2$                                             |                     |
| Formula weight                          | 240.29                                                        |                     |
| Temperature                             | 293.74 (10) K                                                 |                     |
| Wavelength                              | 1.54184                                                       |                     |
| Crystal system                          | orthorhombic                                                  |                     |
| Space group                             | $P2_12_12_1$                                                  |                     |
| Unit cell dimensions                    | $a = 7.35280 (10) \text{ \AA}$                                | $\alpha = 90^\circ$ |
|                                         | $b = 7.36750 (10) \text{ \AA}$                                | $\beta = 90^\circ$  |
|                                         | $c = 24.5337 (4) \text{ \AA}$                                 | $\gamma = 90^\circ$ |
| Volume                                  | $1329.03(3) \text{ \AA}^3$                                    |                     |
| Z                                       | 4                                                             |                     |
| Density (calculated)                    | $1.201 \text{ g/cm}^3$                                        |                     |
| Absorption coefficient                  | $0.619 \text{ mm}^{-1}$                                       |                     |
| F(000)                                  | 512.0                                                         |                     |
| Theta range for data collection         | 7.206 to 152.764.                                             |                     |
| Index ranges                            | $-9 \leq h \leq 9, -9 \leq k \leq 9, -30 \leq l \leq 28$      |                     |
| Reflections collected                   | 12440                                                         |                     |
| Independent reflections                 | 2657 [ $R_{\text{int}} = 0.0335, R_{\text{sigma}} = 0.0199$ ] |                     |
| Data/restraints/parameters              | 2657/0/167                                                    |                     |
| Goodness-of-fit on $F^2$                | 1.079                                                         |                     |
| Final R indexes [ $I \geq 2\sigma(I)$ ] | $R_1 = 0.0420, wR_2 = 0.1210$                                 |                     |
| R indexes [all data]                    | $R_1 = 0.0448, wR_2 = 0.1237$                                 |                     |

## XI. References

- 1 C. Zhao, L.-C. Liu, J. Wang, C. Jiang, Q.-W. Zhang and W. He, *Org. Lett.*, 2016, **18**, 328.
- 2 K. Kobayashi, M. Itoh and H. Suginome, *Tetrahedron Lett.*, 1987, **28**, 3369.
- 3 S. Singh, R. Samineni, S. Pabbaraja and G. Mehta. *Angew. Chem. Int. Ed.*, 2018, **57**, 16847.
- 4 (a) P.-H. Chen, N. A. Savage and G. Dong, *Tetrahedron*, 2014, **70**, 4135; (b) L. S. Liebeskind, L. J. Lescosky and C. M. McSwain, *J. Org. Chem.*, 1989, **54**, 1435.
- 5 T. Xu and G. Dong, *Angew. Chem. Int. Ed.*, 2012, **51**, 7567.
- 6 T. Seki, K. Kobayashi and H. Ito, *Chem. Commun.*, 2017, **53**, 6700-6703.
- 7 M. J. Frisch, G. W. Trucks, H. B. Schlegel, G. E. Scuseria, M. A. Robb, J. R. Cheeseman, G. Scalmani, V. Barone, B. Mennucci, G. A. Petersson, H. Nakatsuji, M. Caricato, X. Li, H. P. Hratchian, A. F. Izmaylov, J. Bloino, G. Zheng, J. L. Sonnenberg, M. Hada, M. Ehara, K. Toyota, R. Fukuda, J. Hasegawa, M. Ishida, T. Nakajima, Y. Honda, O. Kitao, H. Nakai, T. Vreven, J. A. Montgomery Jr., J. E. Peralta, F. Ogliaro, M. Bearpark, J. J. Heyd, E. Brothers, K. N. Kudin, V. N. Staroverov, T. Keith, R. Kobayashi, J. Normand, K. Raghavachari, A. Rendell, J. C. Burant, S. S. Iyengar, J. Tomasi, M. Cossi, N. Rega, J. M. Millam, M. Klene, J. E. Knox, J. B. Cross, V. Bakken, C. Adamo, J. Jaramillo, R. Gomperts, R. E. Stratmann, O. Yazyev, A. J. Austin, R. Cammi, C. Pomelli, J. W. Ochterski, R. L. Martin, K. Morokuma, V. G. Zakrzewski, G. A. Voth, P. Salvador, J. J. Dannenberg, S. Dapprich, A. D. Daniels, O. Farkas, J. B. Foresman, J. V. Ortiz, J. Cioslowski and D. J. Fox, Gaussian 09, Revision E.01, Gaussian, Inc., Wallingford CT, 2013.
- 8 (a) A. D. Becke, Density-Functional Thermochemistry. III. The Role of Exact Exchange, *J. Chem. Phys.*, 1993, **98**, 5648; (b) C. Lee, W. Yang and R. G. Parr, Development of the Colle-Salvetti Correlation-energy Formula into a Functional of the Electron Density, *Phys. Rev. B*, 1988, **37**, 785; (c) P. J. Stephens, F. J. Devlin, C. F. Chabalowski and M. J. Frisch, Ab Initio Calculation of Vibrational Absorption and Circular Dichroism Spectra Using Density Functional Force

- Fields, *J. Phys. Chem.*, 1994, **98**, 11623; (d) S. Grimme, J. Antony, S. Ehrlich and H. Krieg, A Consistent and Accurate Ab Initio Parametrization of Density Functional Dispersion Correction (DFT-D) for the 94 Elements H-Pu, *J. Chem. Phys.*, 2010, **132**, 154104; (e) B. Miehl, A. Savin, H. Stoll and H. Preuss, Results Obtained with the Correlation Energy Density Functionals of Becke and Lee, Yang and Parr, *Chem. Phys. Lett.*, 1989, **157**, 200; (f) S. Grimme, S. Ehrlich, L. Goerigk, Effect of the Damping Function in Dispersion Corrected Density Functional Theory, *J. Comput. Chem.*, 2011, **32**, 1456.
- 9 F. Weigend and R. Ahlrichs, Balanced Basis Sets of Split Valence, Triple Zeta Valence and Quadruple Zeta Valence Quality for H to Rn: Design and Assessment of Accuracy. *Phys. Chem. Chem. Phys.*, 2005, **7**, 3297.
- 10 (a) K. Fukui, A Formulation of the Reaction Coordinate, *J. Phys. Chem.*, 1970, **74**, 4161; (b) K. Fukui, The Path of Chemical Reactions-The IRC Approach, *Acc. Chem. Res.*, 1981, **14**, 363.
- 11 F. Weigend, Accurate Coulomb-Fitting Basis Sets for H to Rn. *Phys. Chem. Chem. Phys.*, 2006, **8**, 1057.
- 12 S. Miertuš, E. Scrocco, J. Tomasi, Electrostatic Interaction of a Solute with A Continuum. A Direct Utilizaion of AB Initio Molecular Potentials for the Prevision of Sovent Effects. *Chem. Phys.* 1981, **55**, 117.
- 13 C. A. Herdman, L. Devkota, C.-M. Lin, H. Niu, T. E. Strecker, R. Lopez, L. Liu, C. S. George, R. P. Tanpure, E. Hamel, D. J. Chaplin, R. P. Mason, M. L. Trawick and K. G. Pinney, *Bioorg. Med. Chem.*, 2015, **23**, 7497.
- 14 S. Asako, T. Kobashi and K. Takai, *J. Am. Chem. Soc.*, 2018, **140**, 15425-15429.
- 15 B. Cacciuttolo, S. Poulain-Martini, F. Fontaine-Vive, M. A. H. Abdo, H. El-Kashef and E. Du řach, *Eur. J. Org. Chem.*, 2014, 7458.

## XII. $^1\text{H}$ and $^{13}\text{C}$ NMR spectra of the described compounds

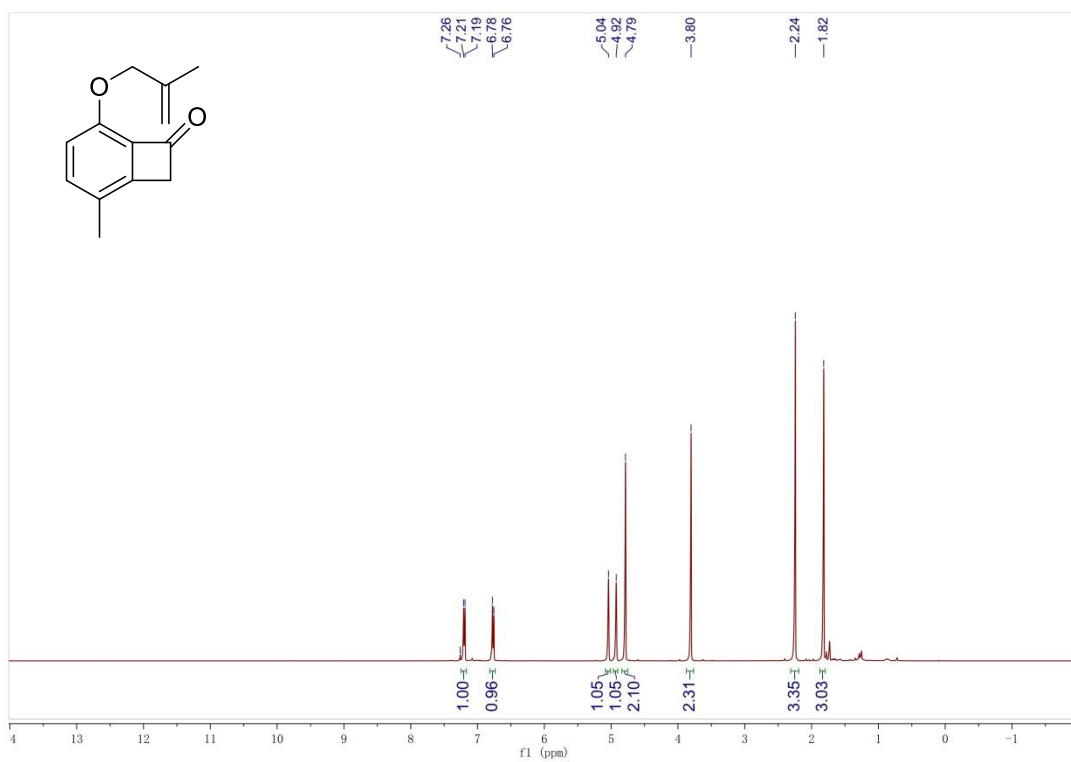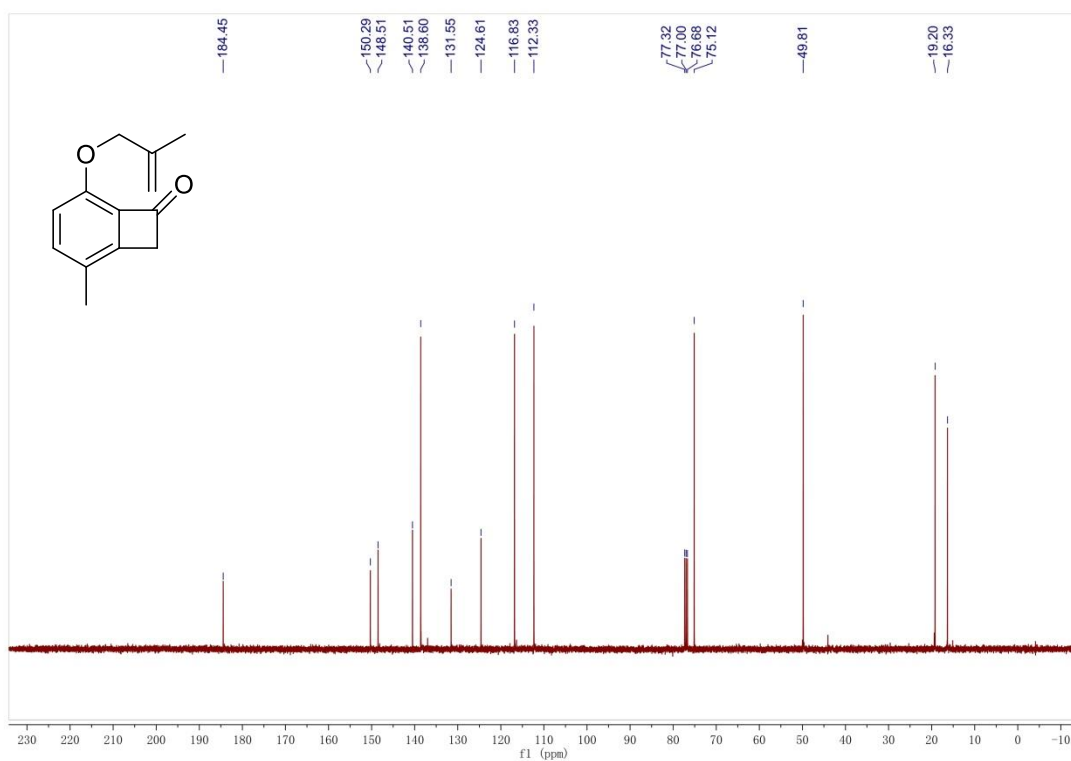



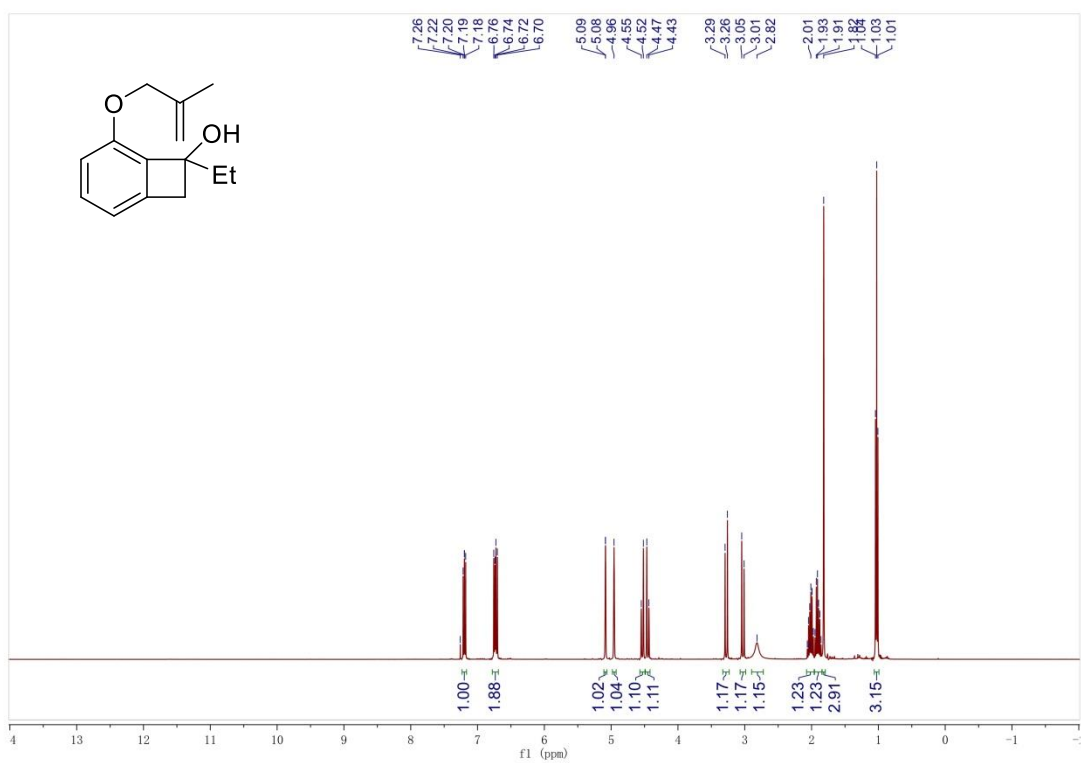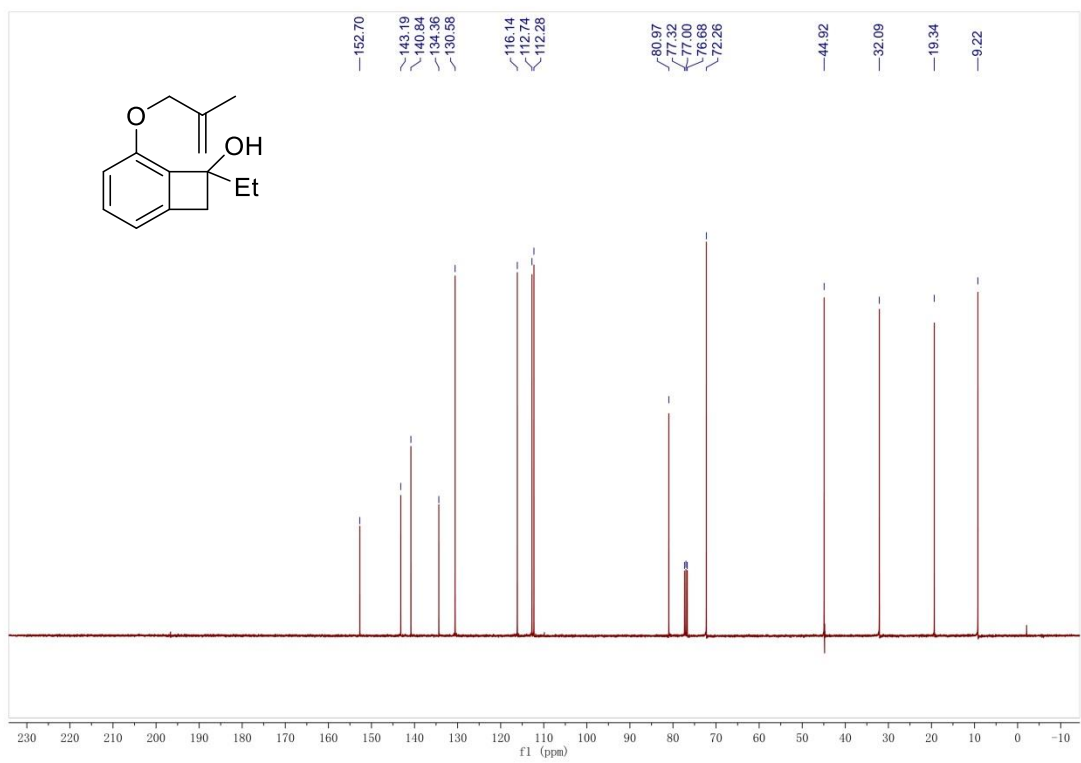

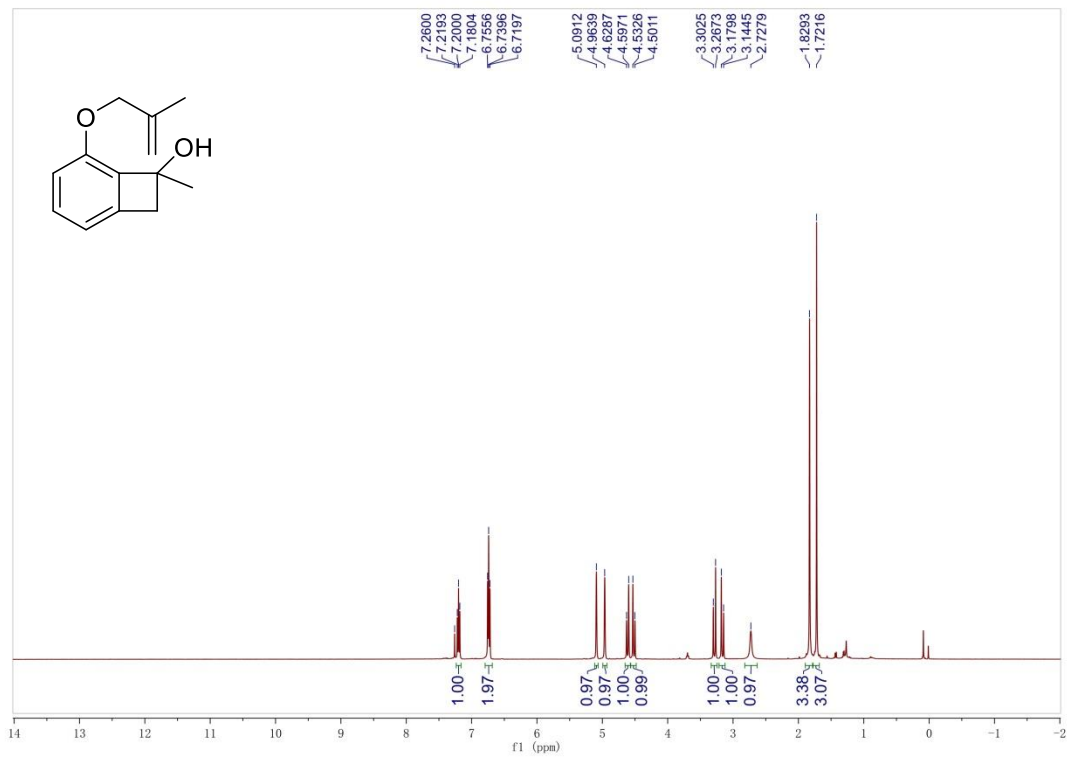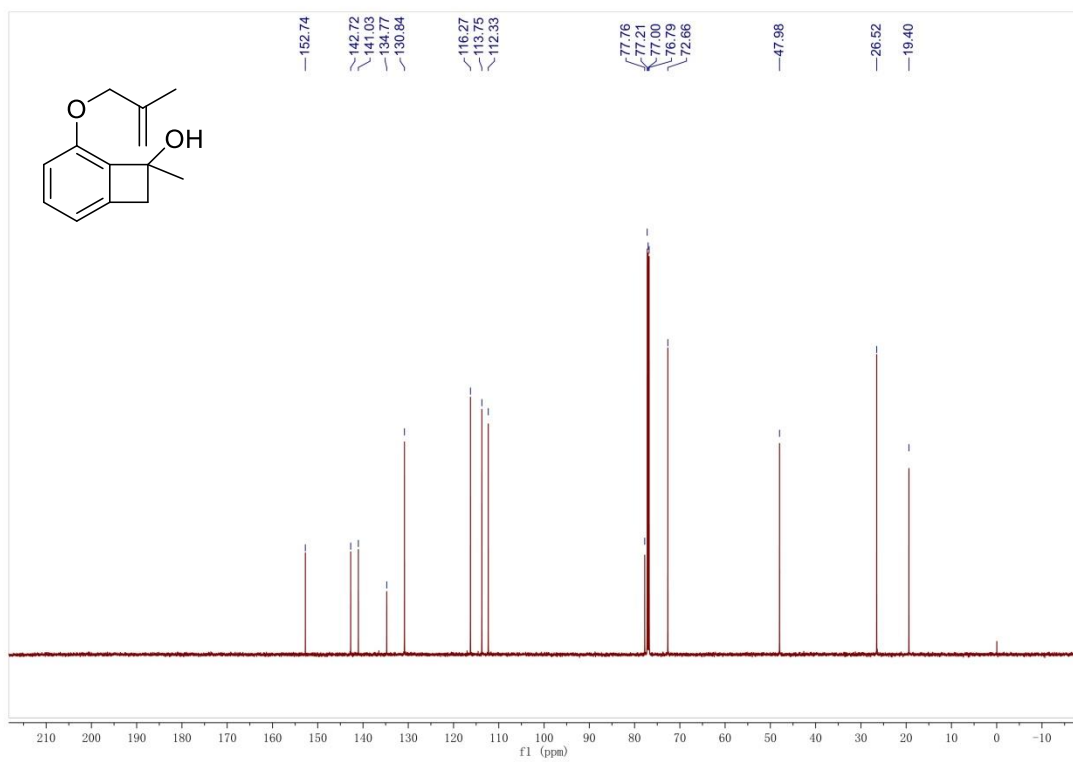

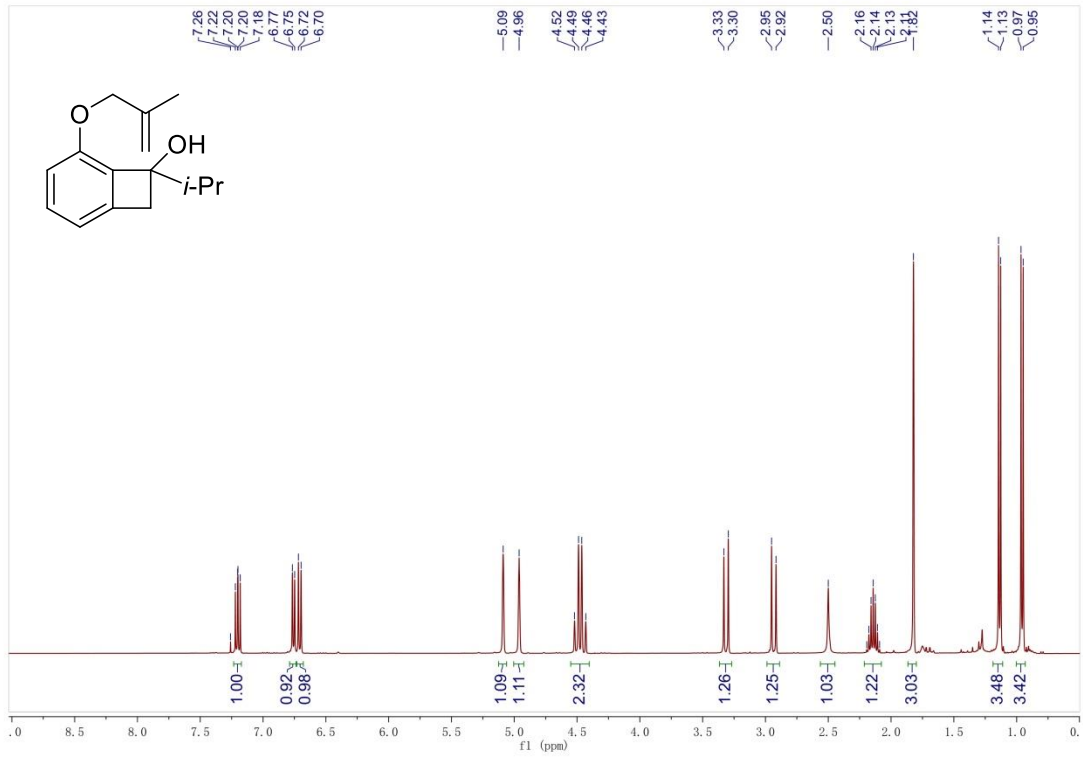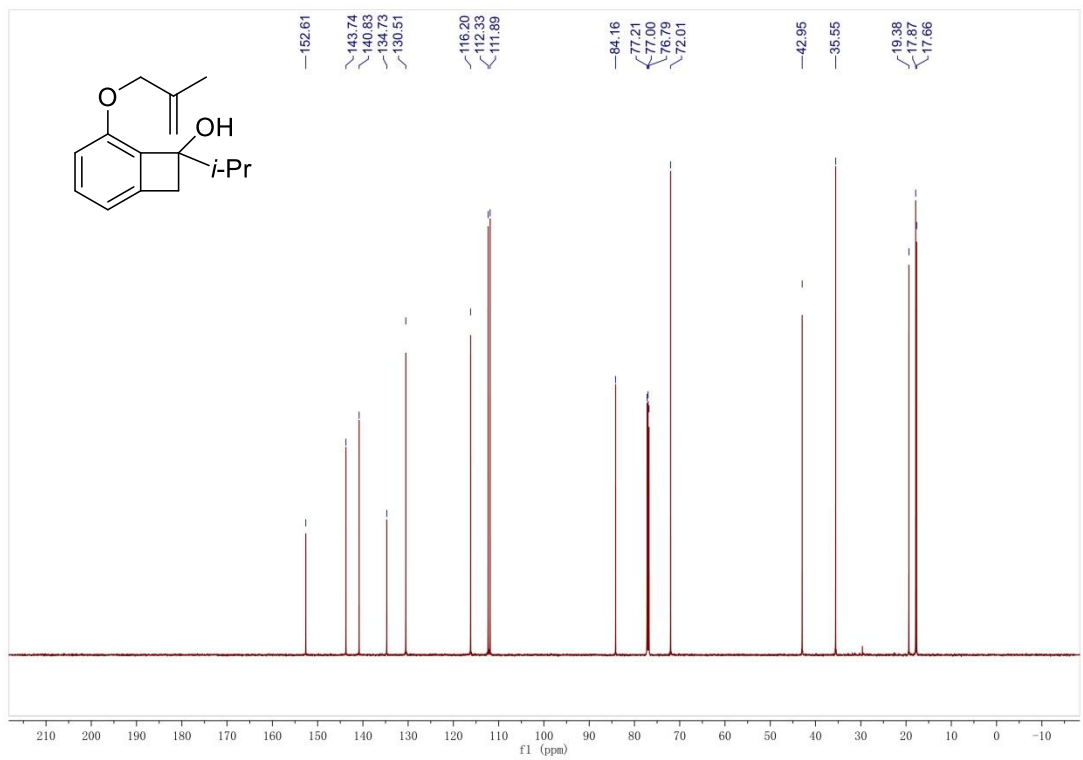

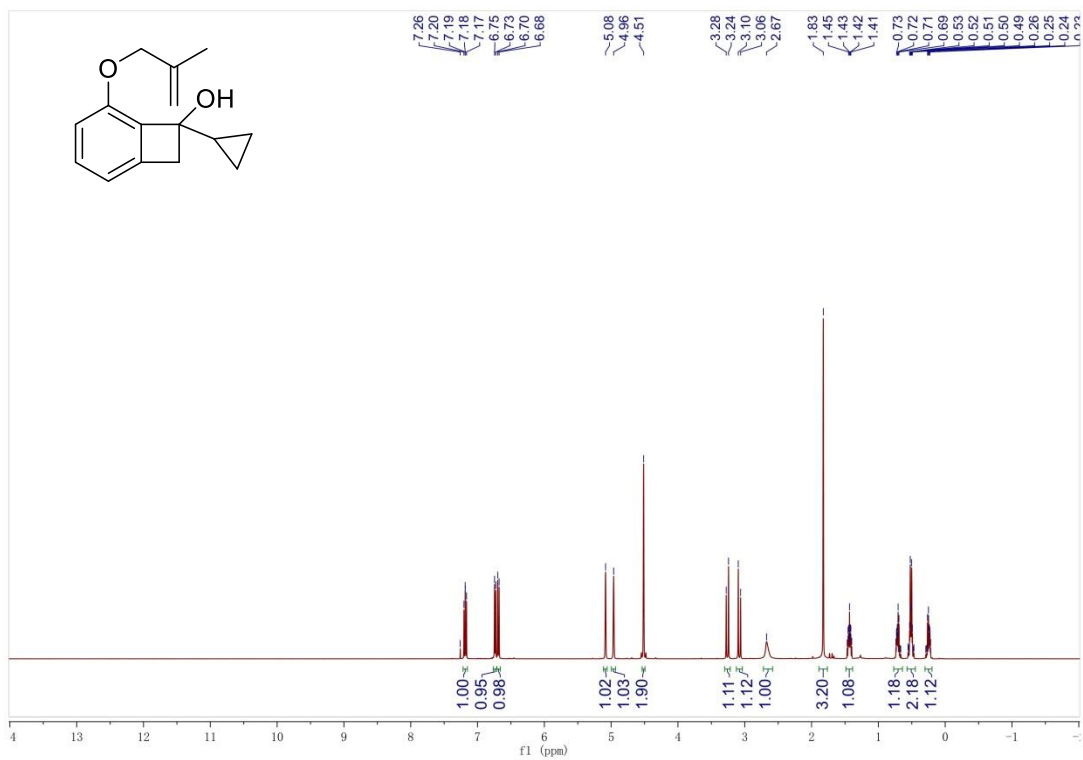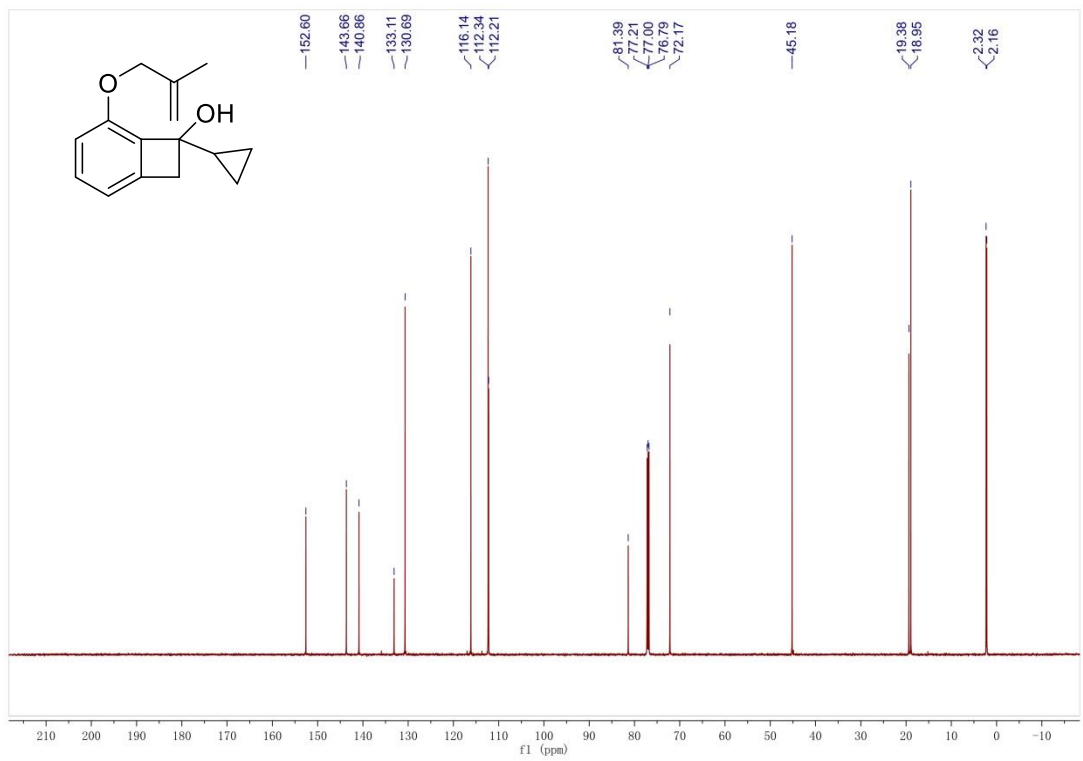

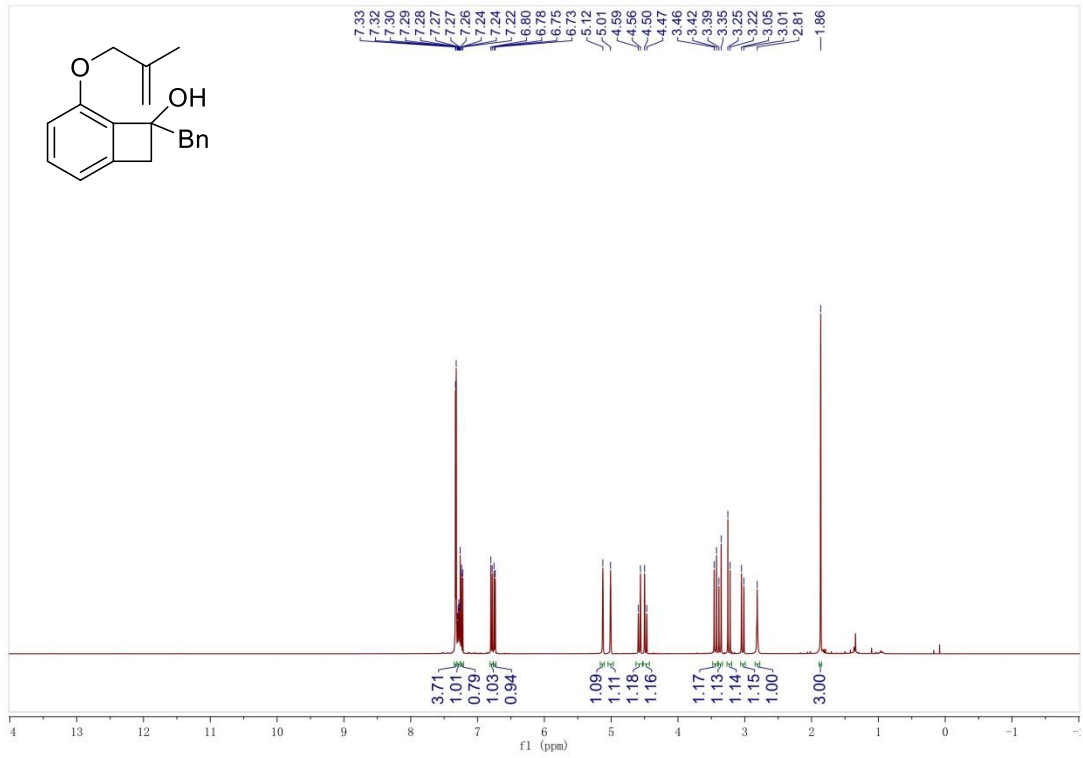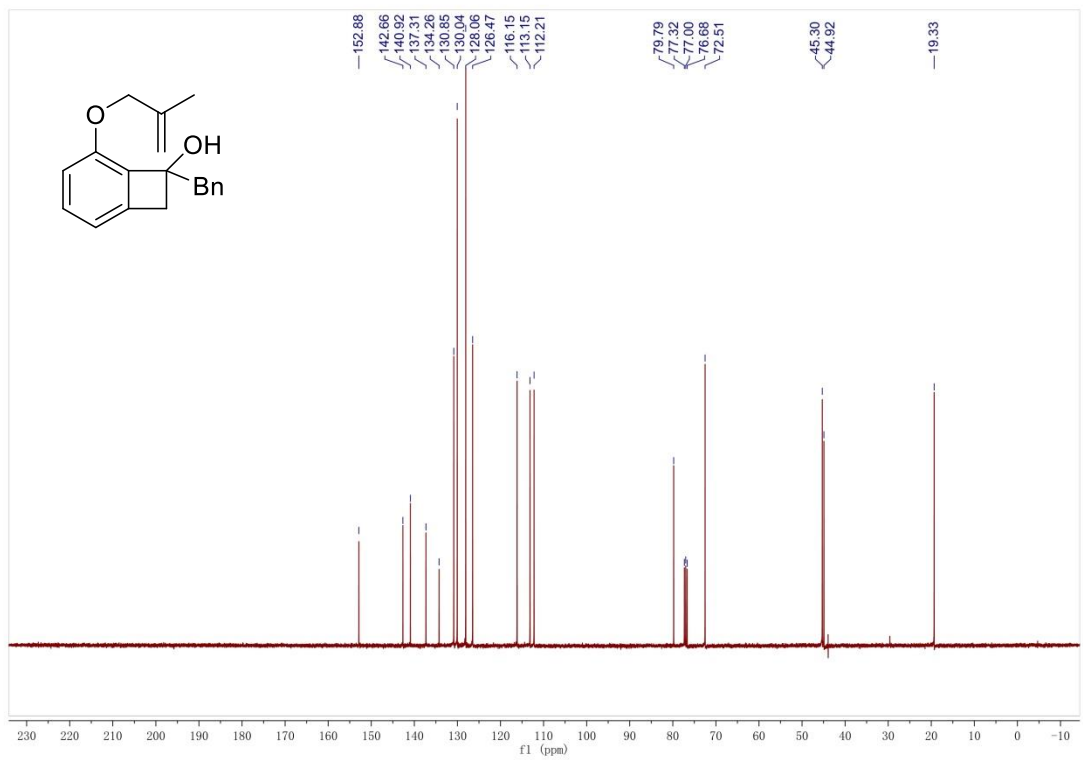

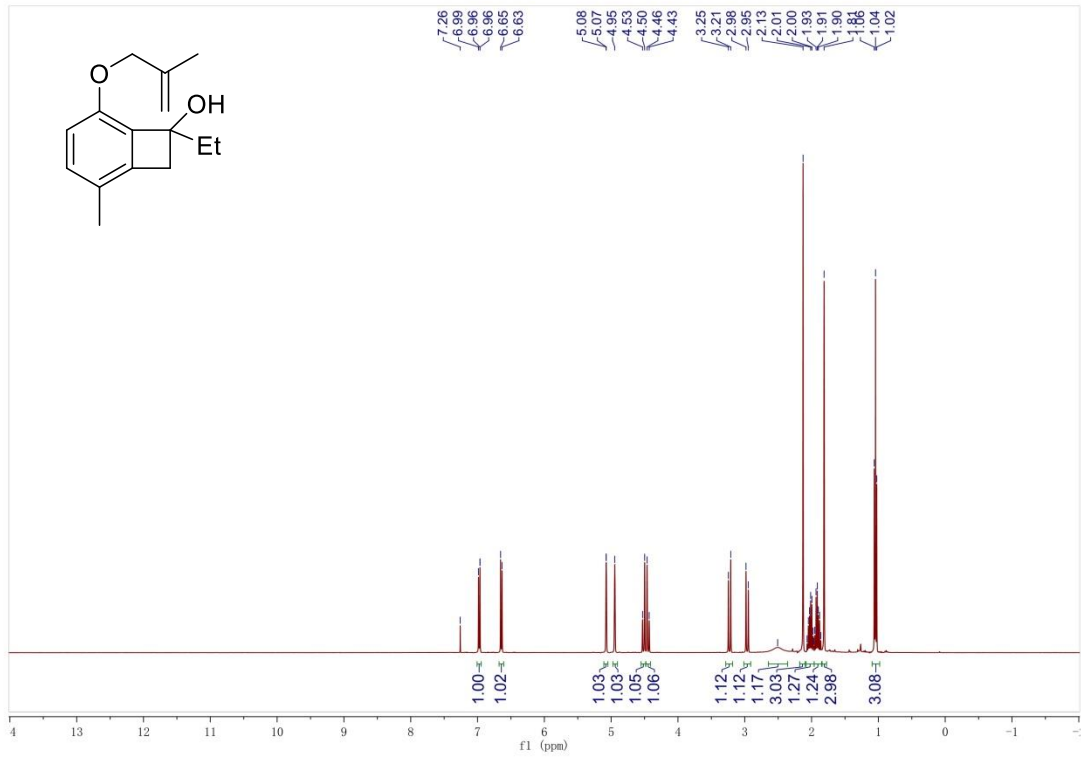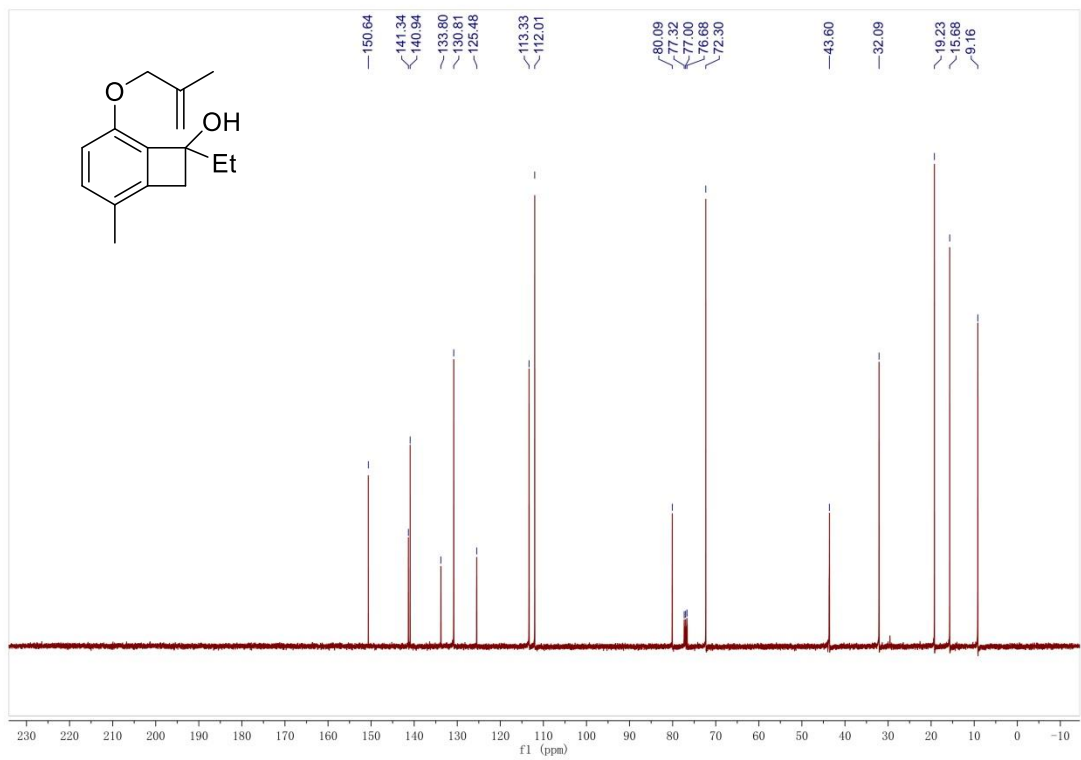

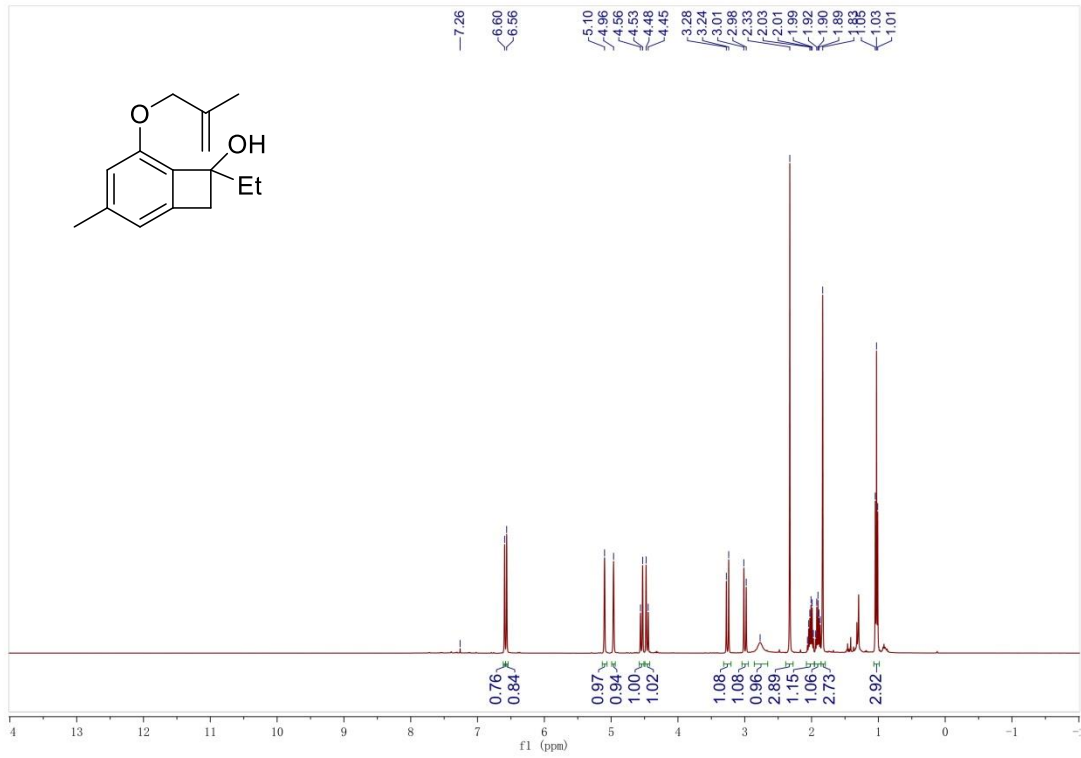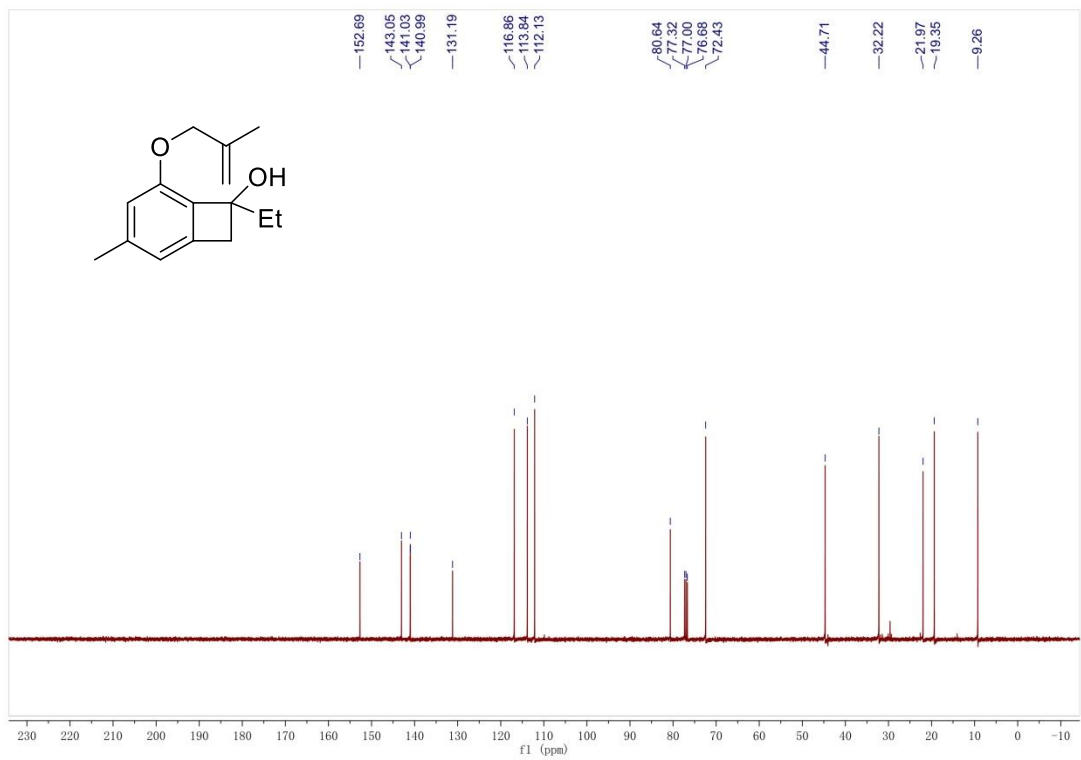

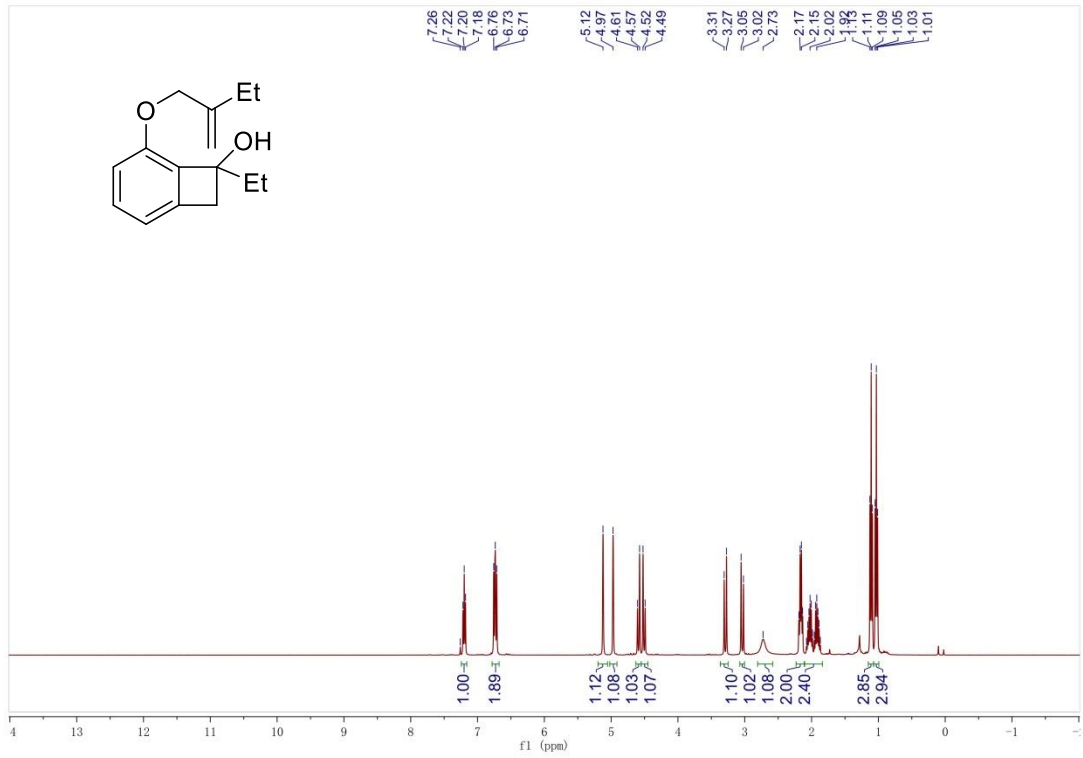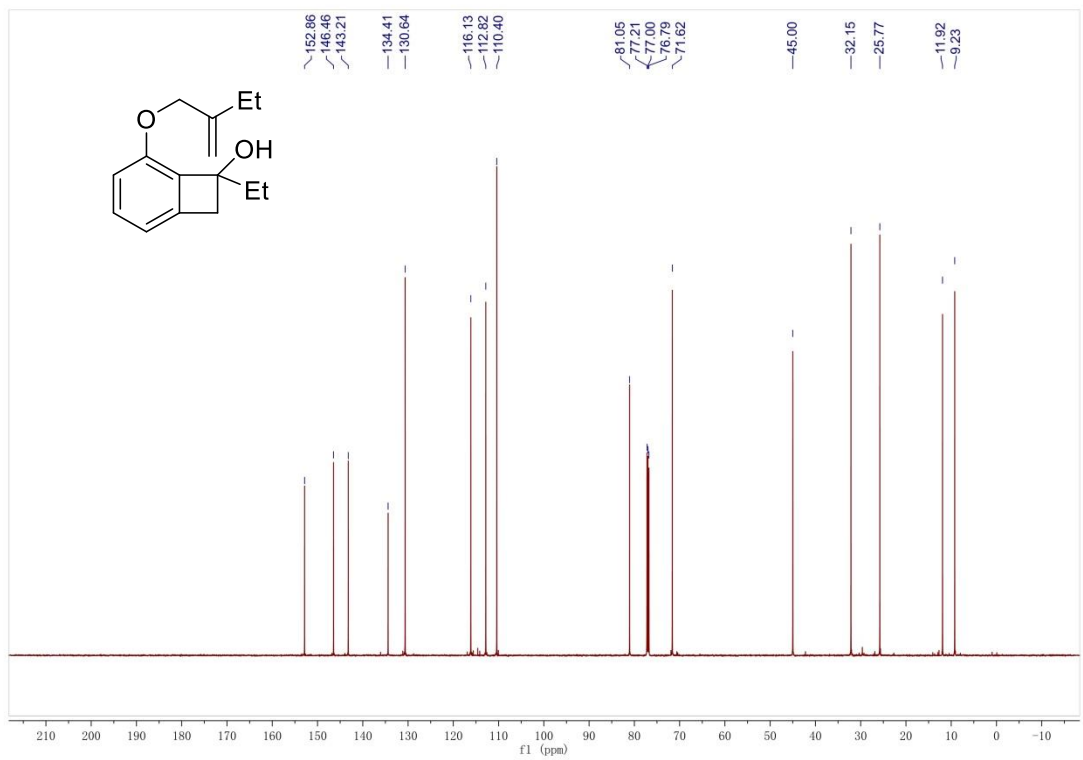



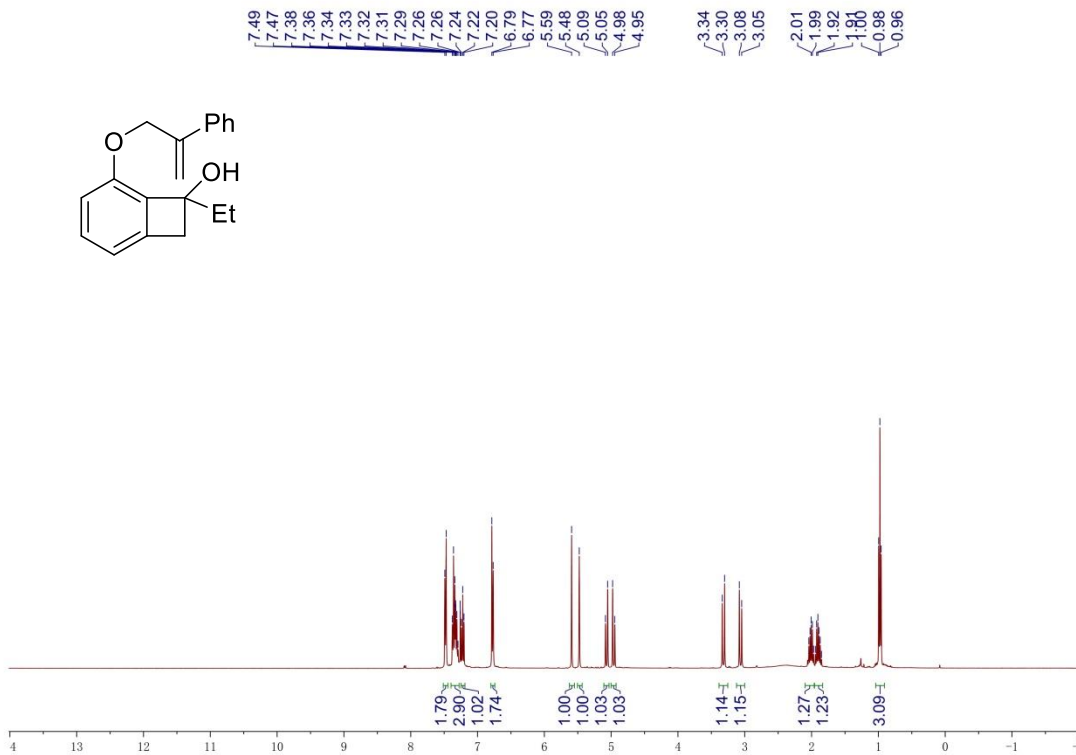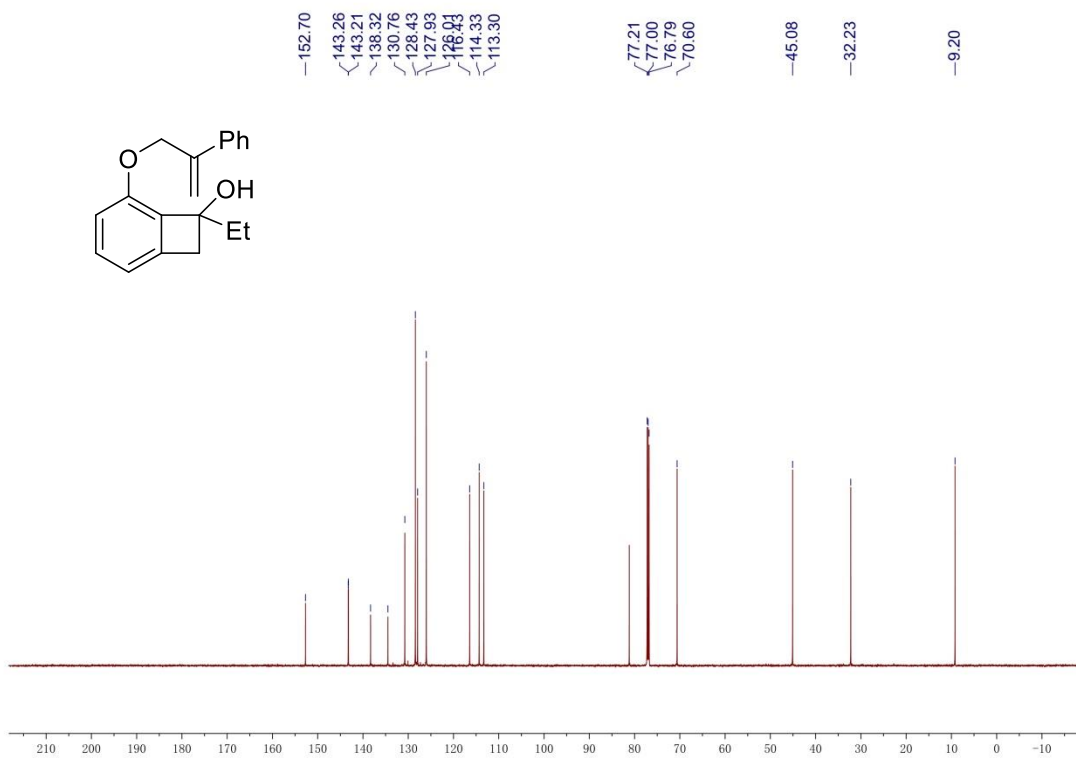

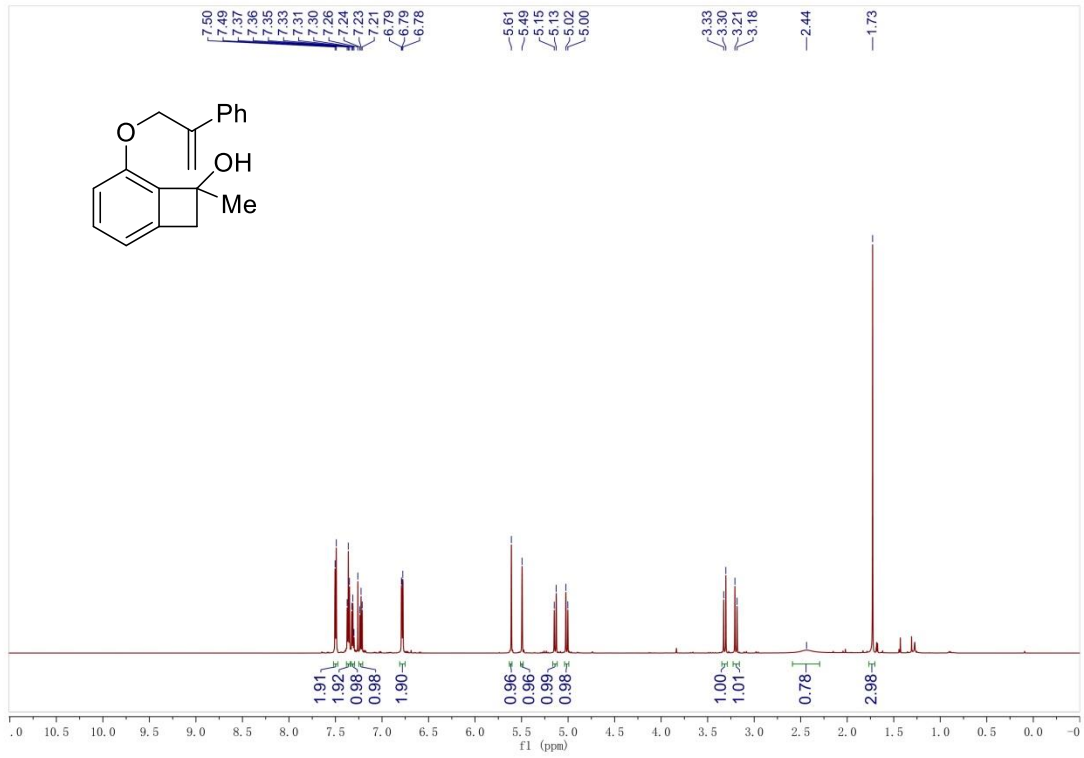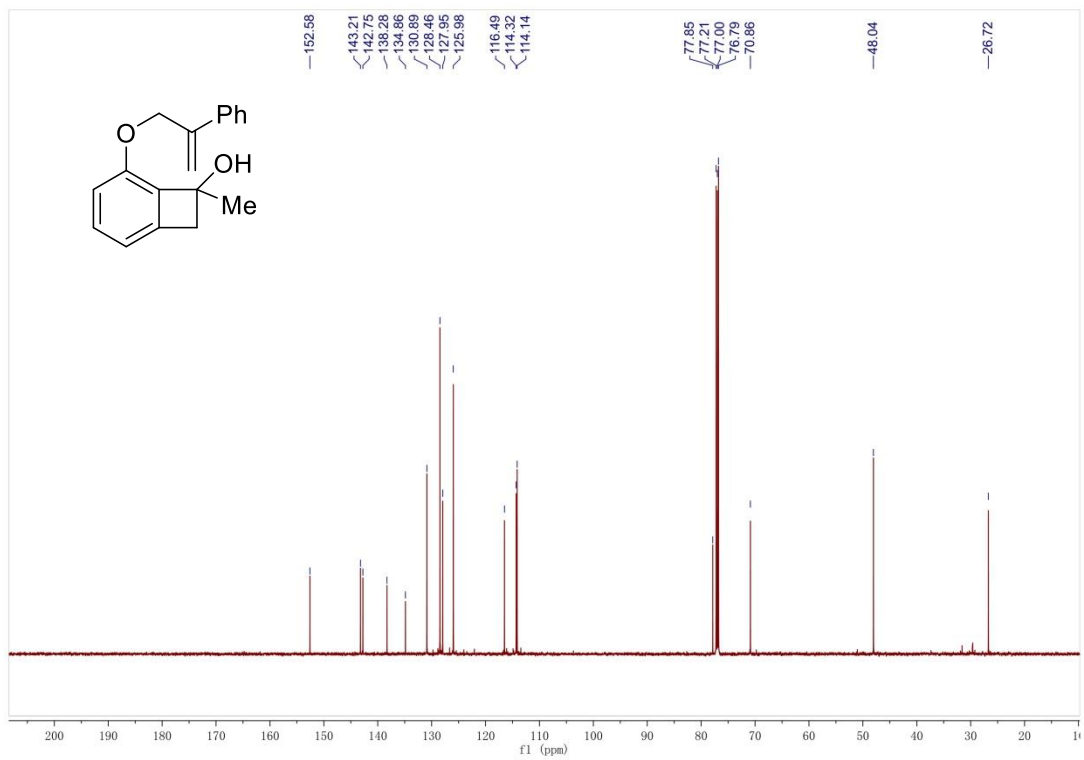

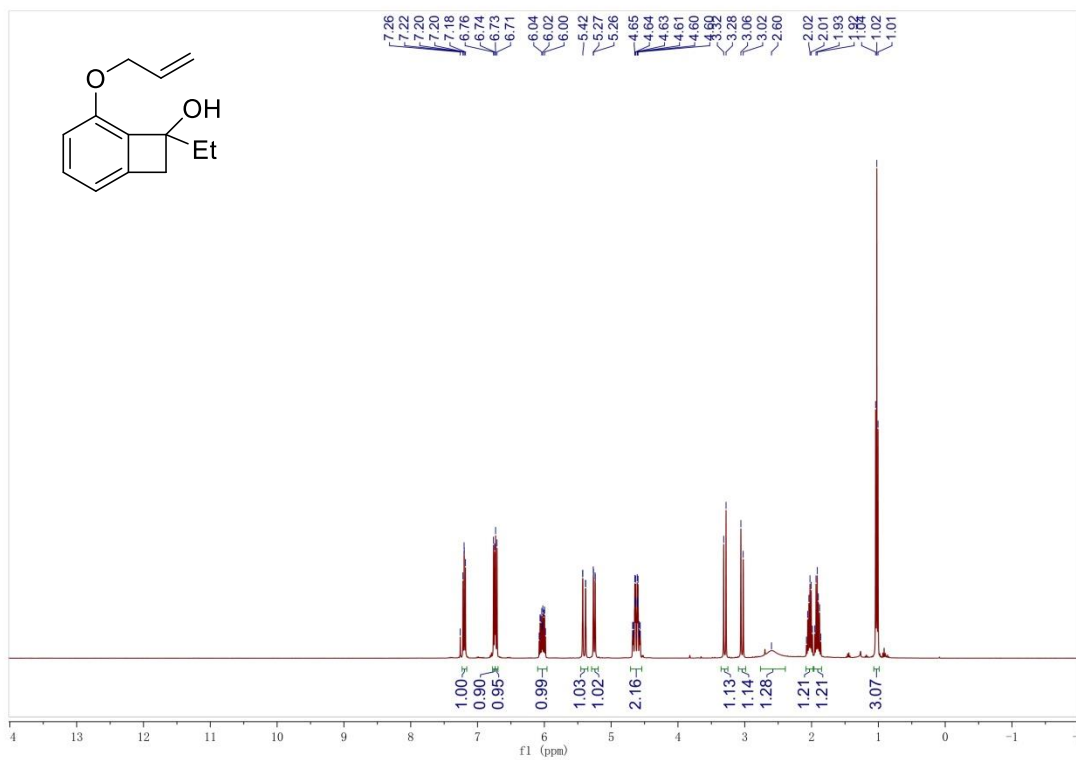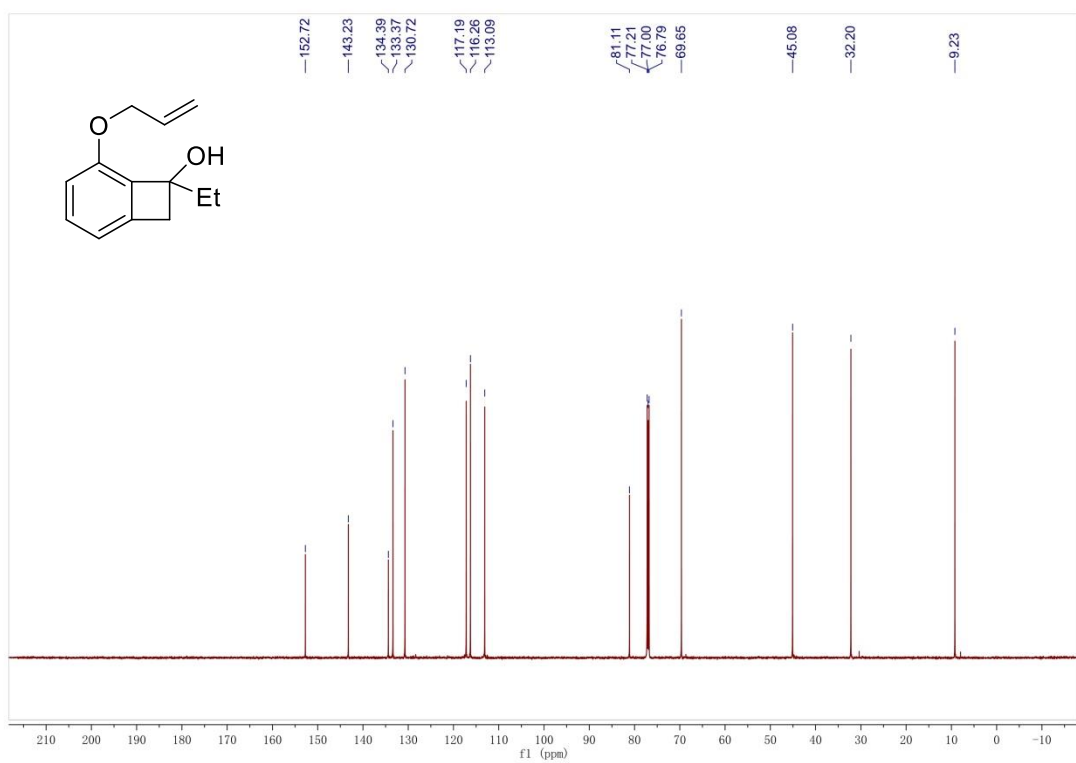

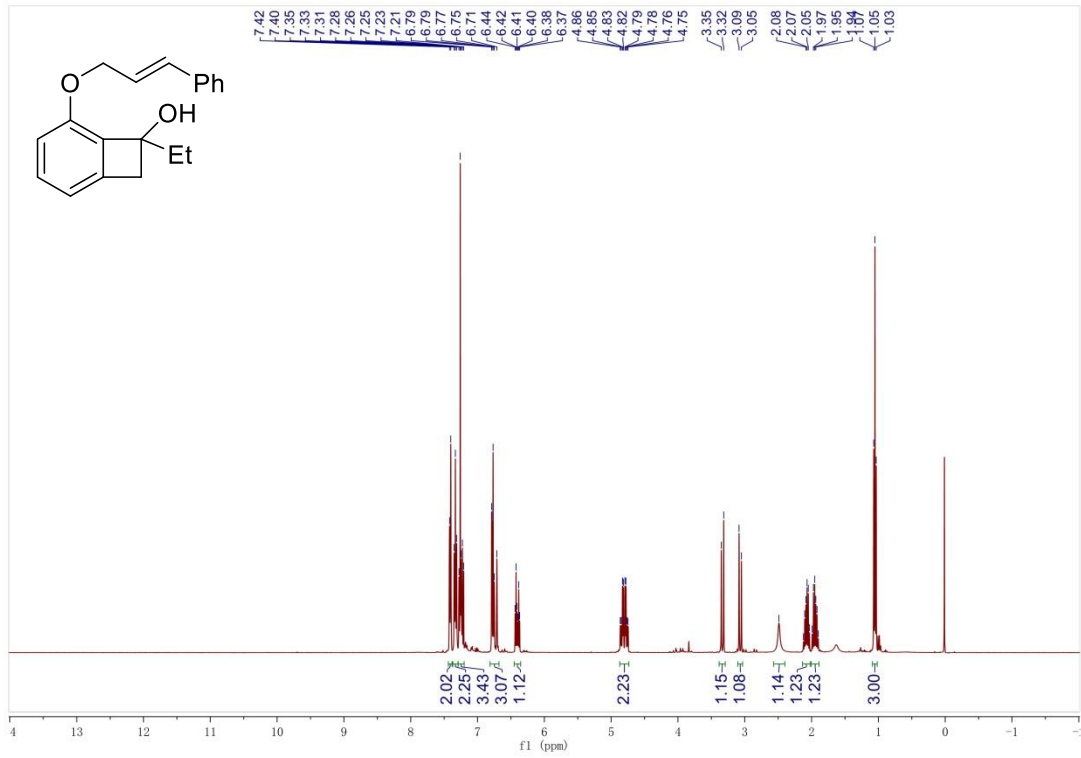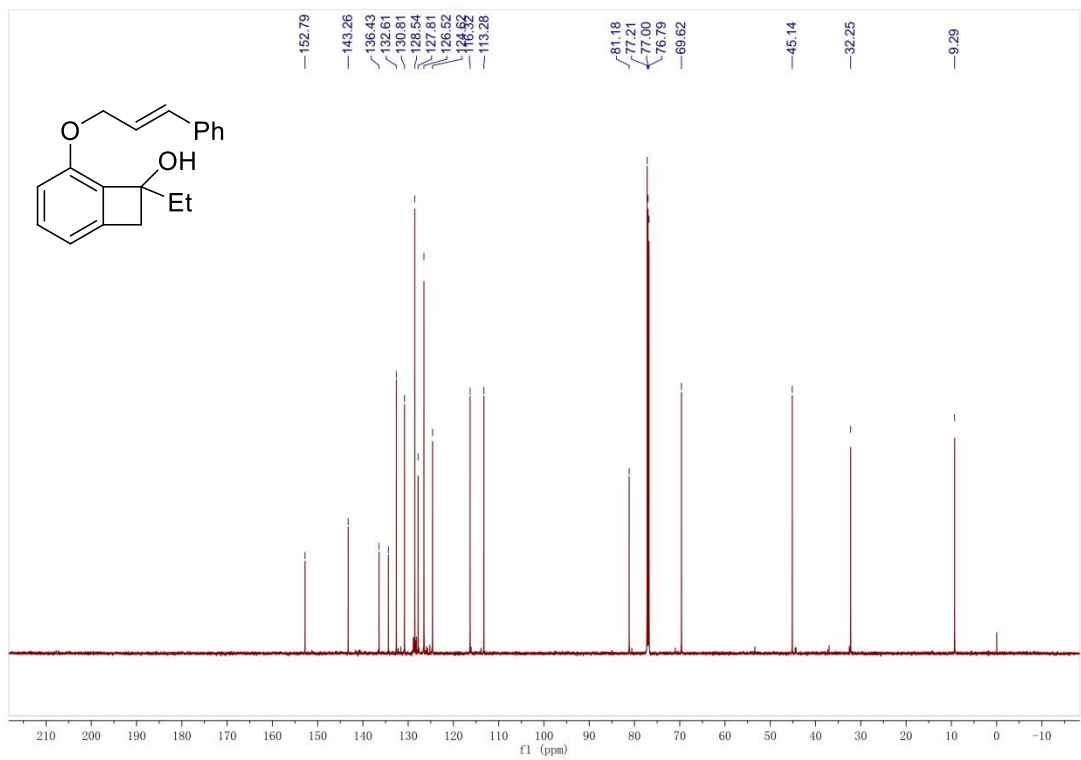

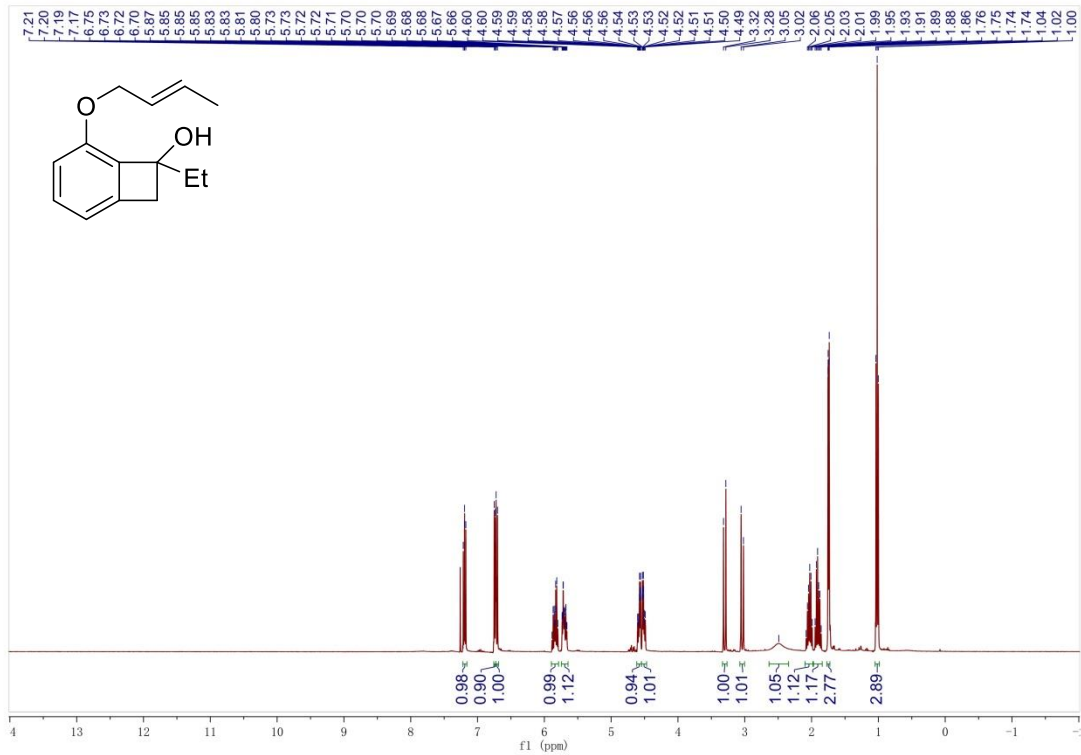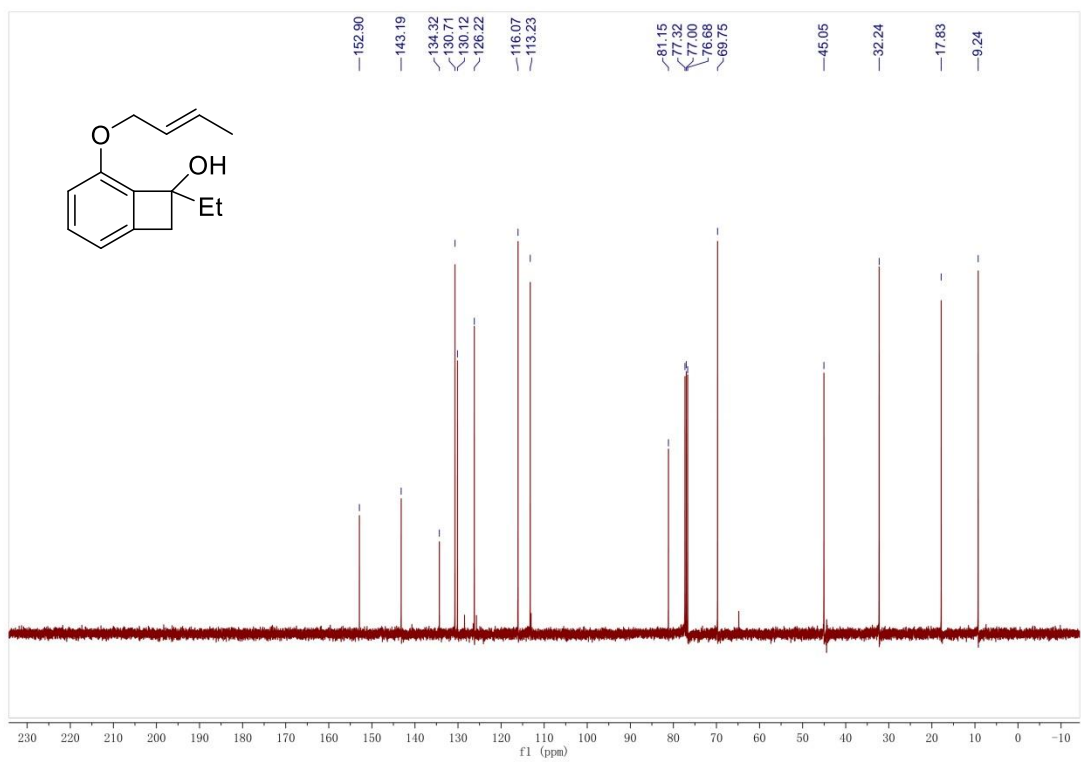

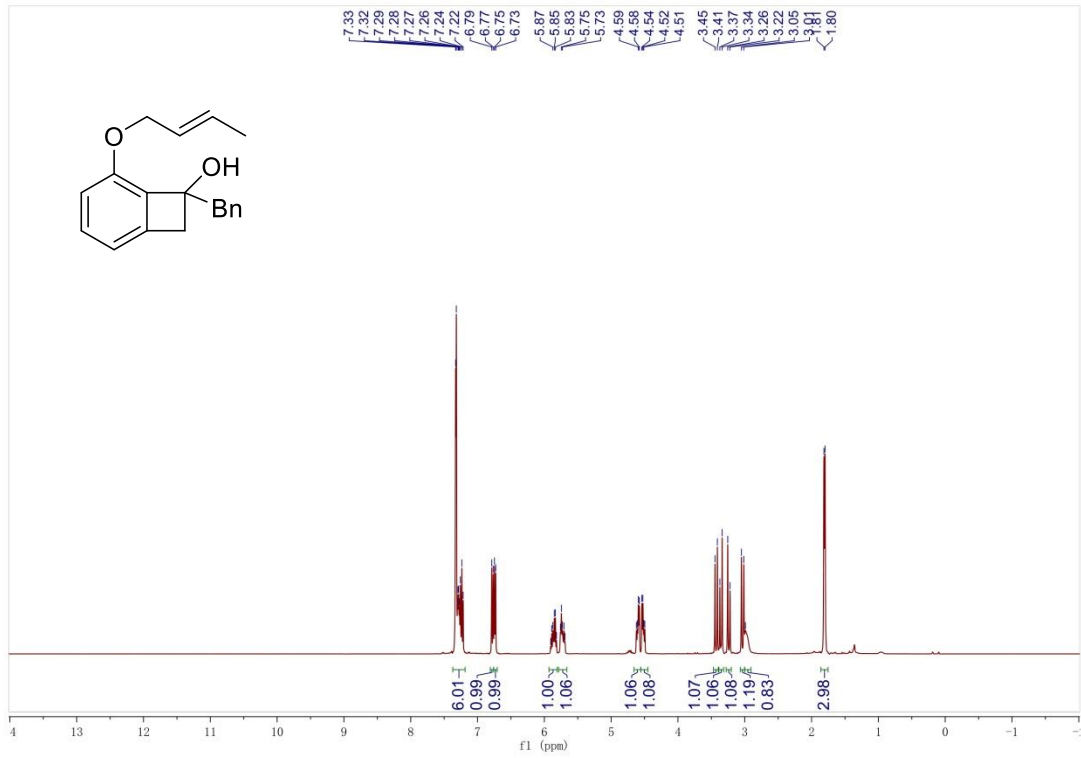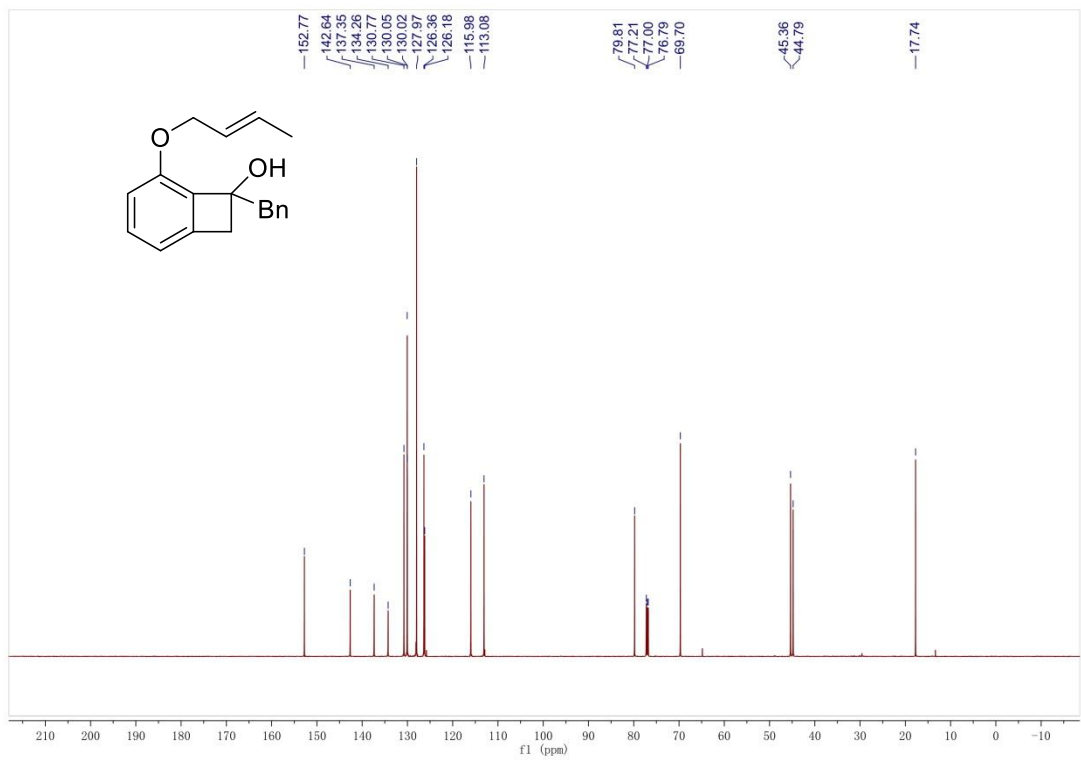

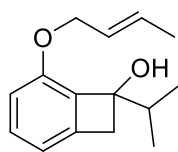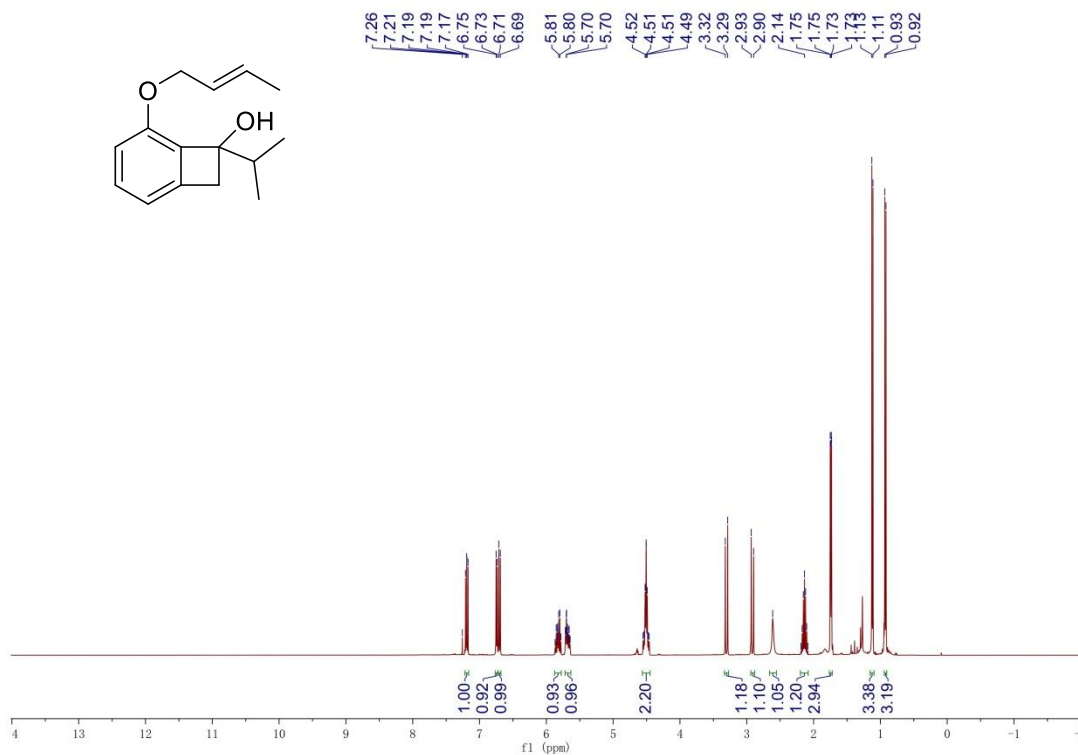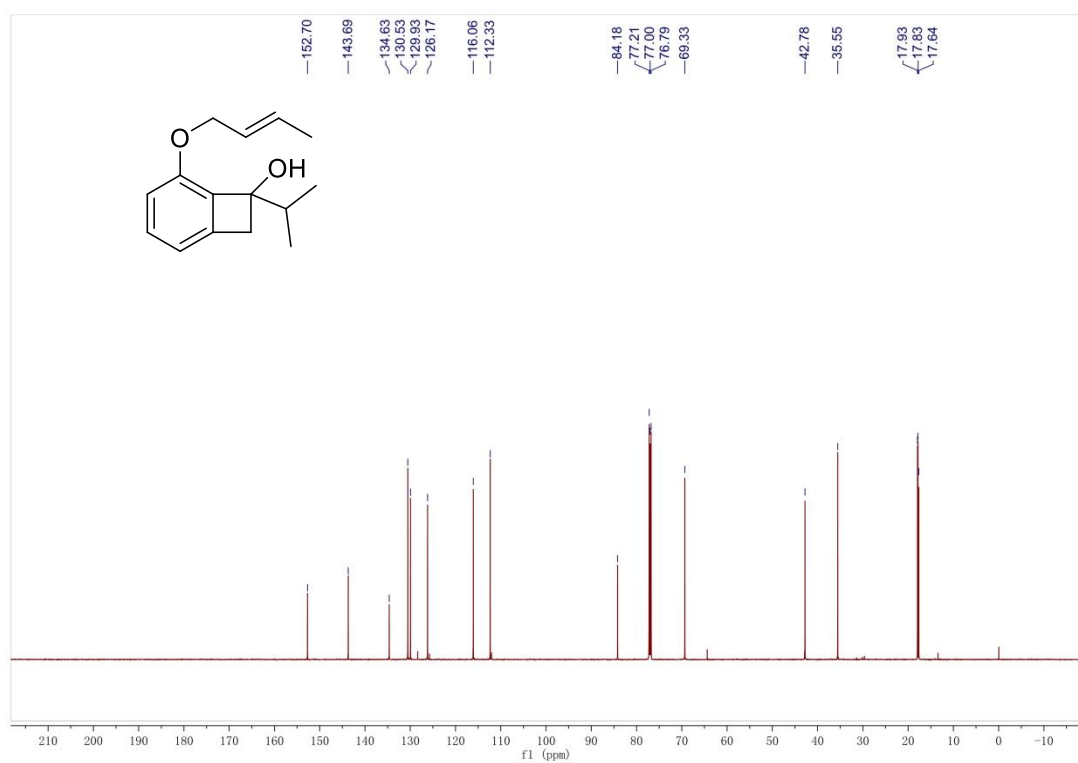

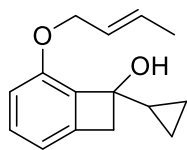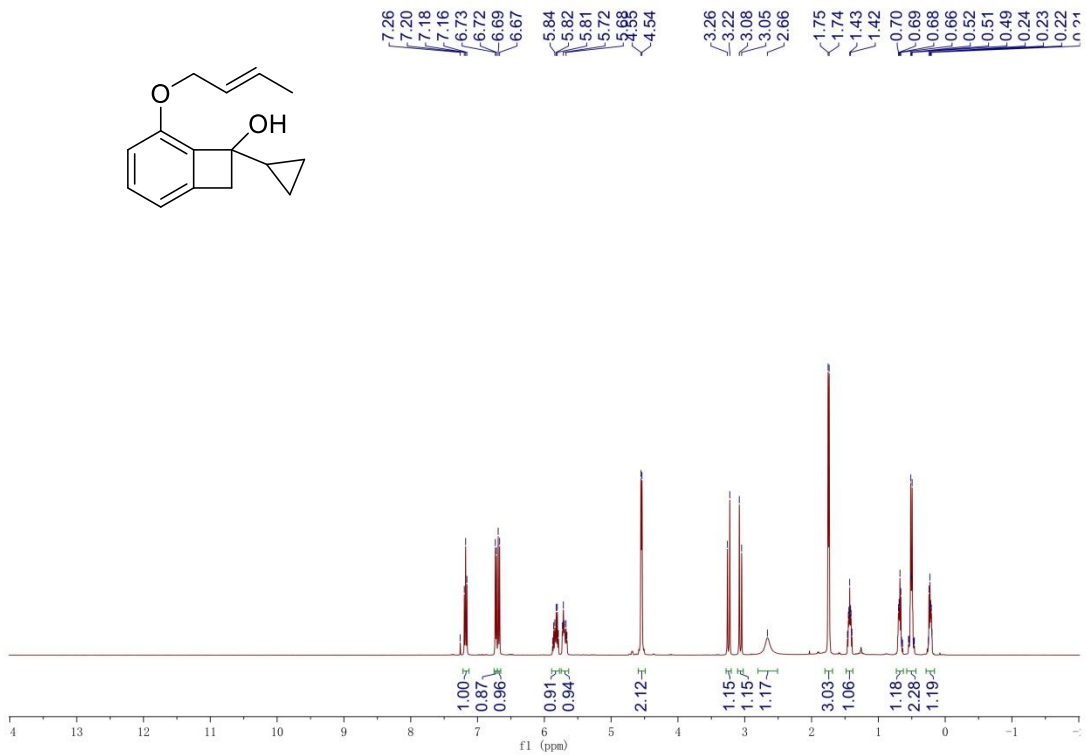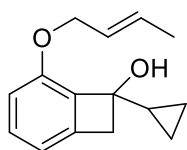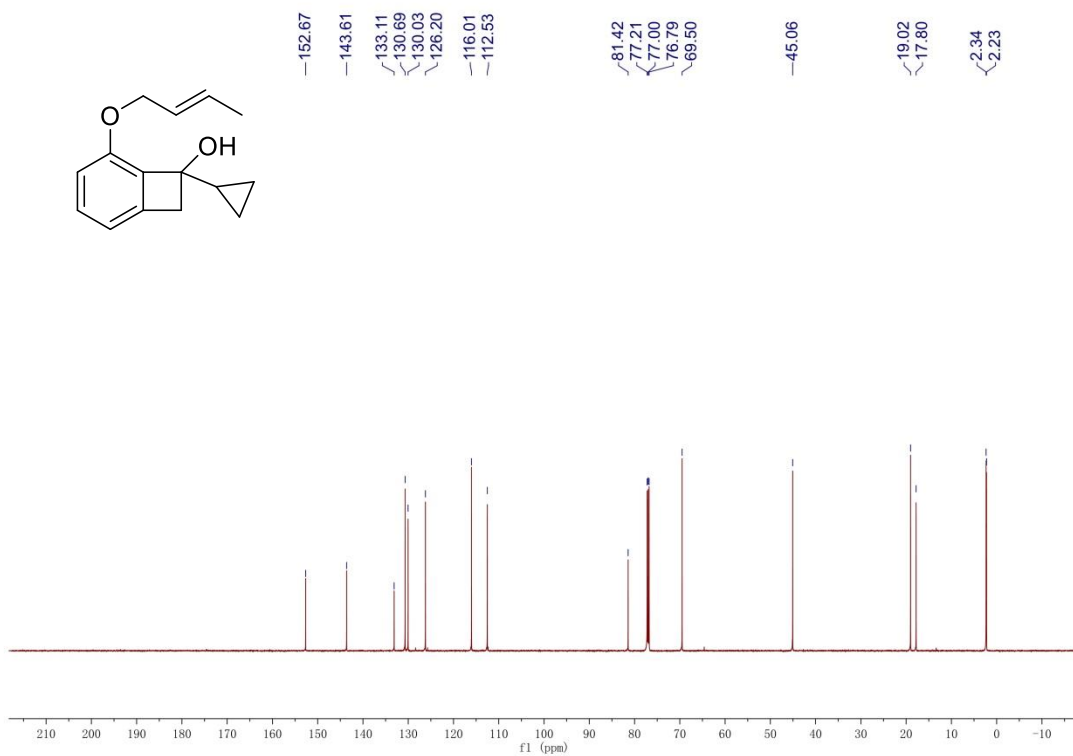



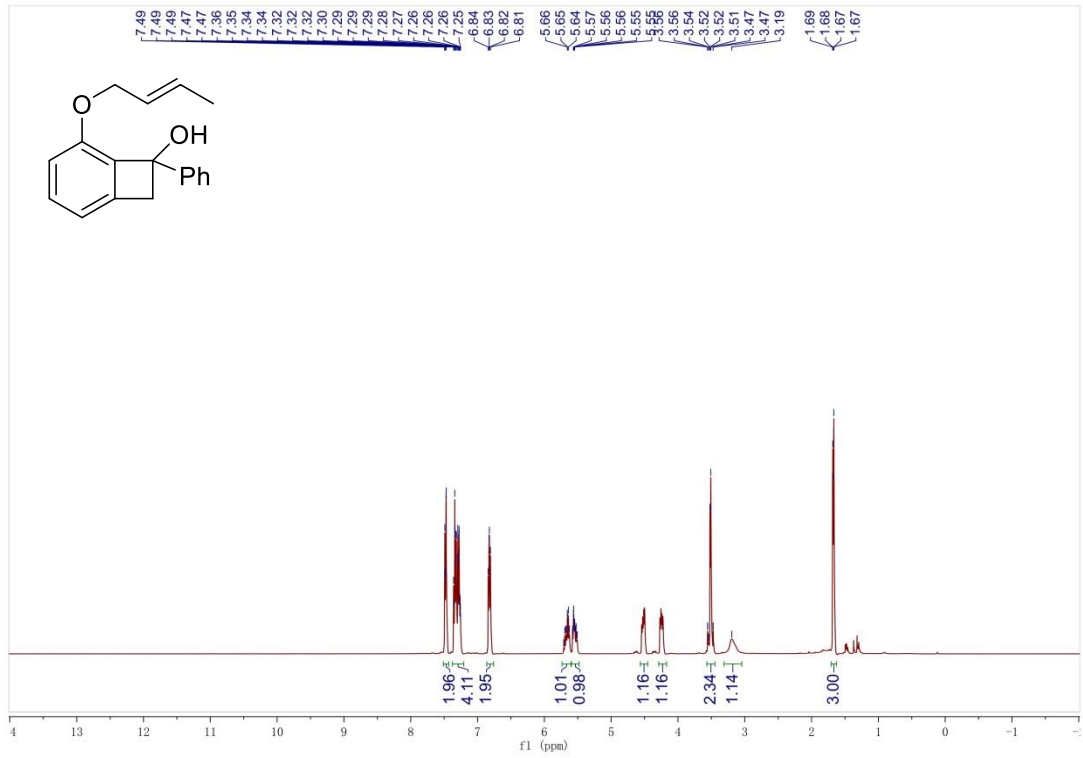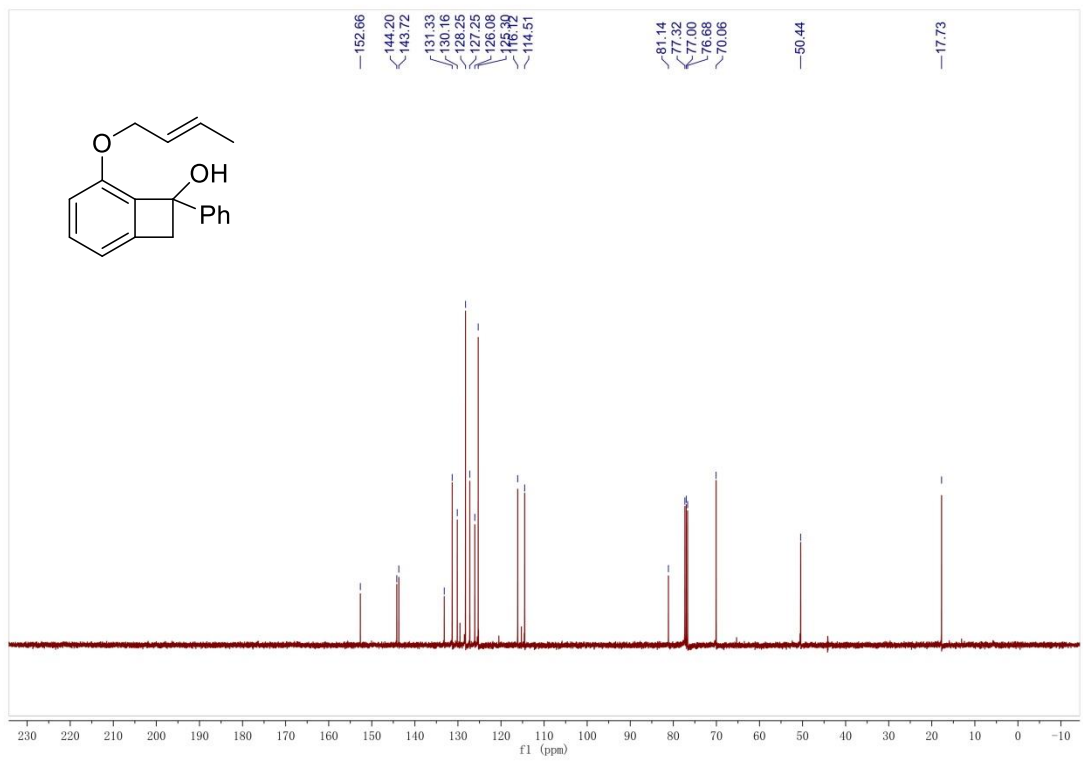

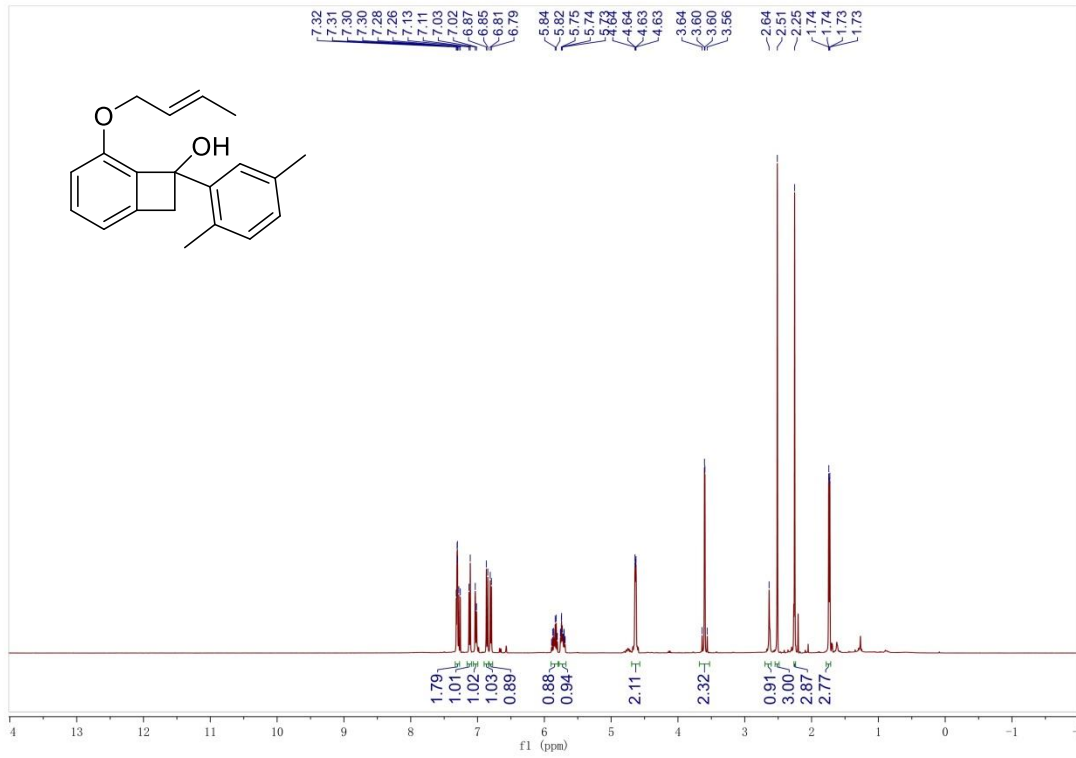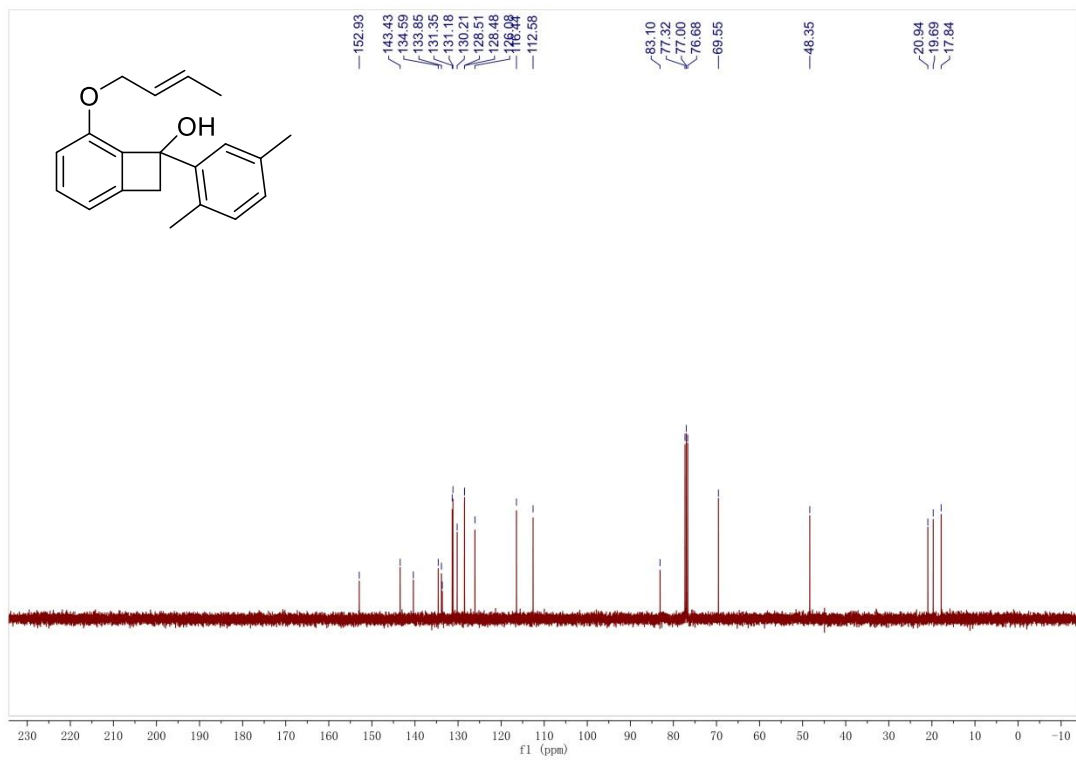

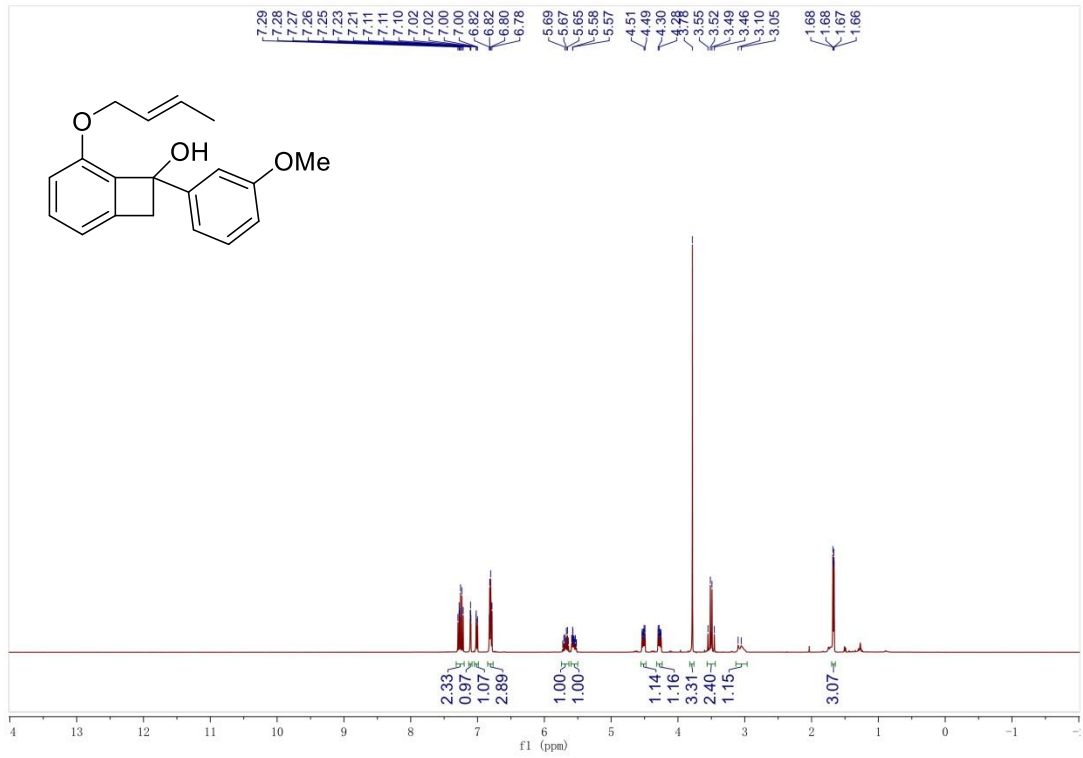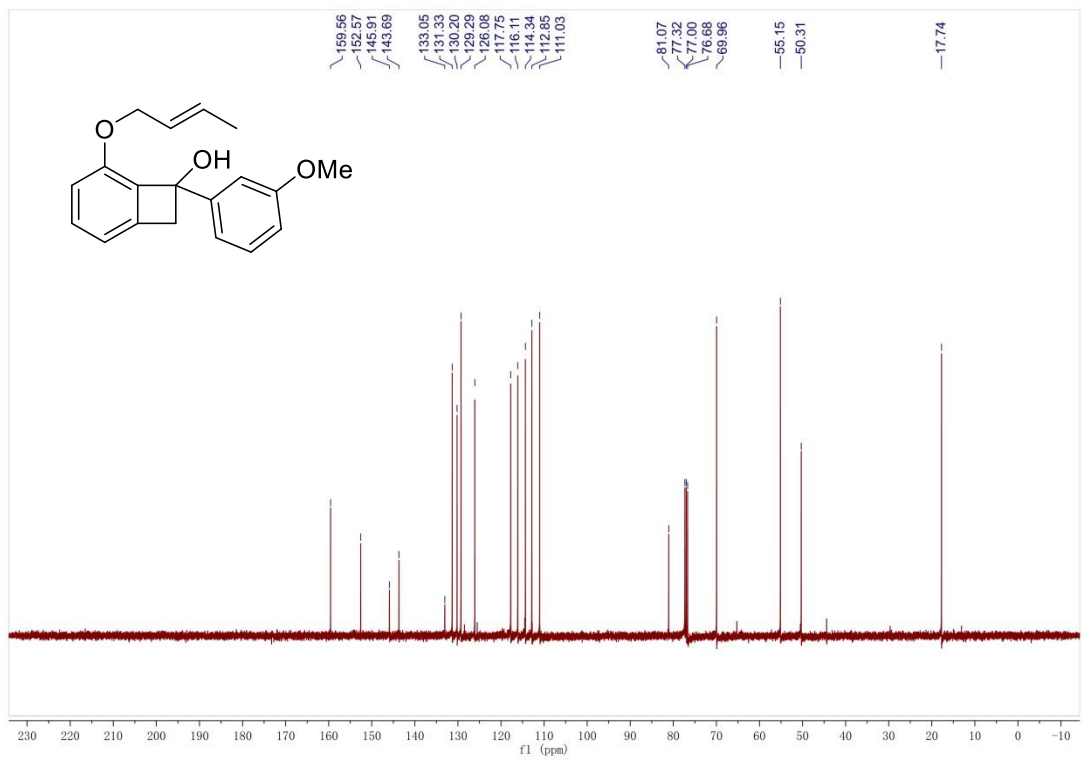

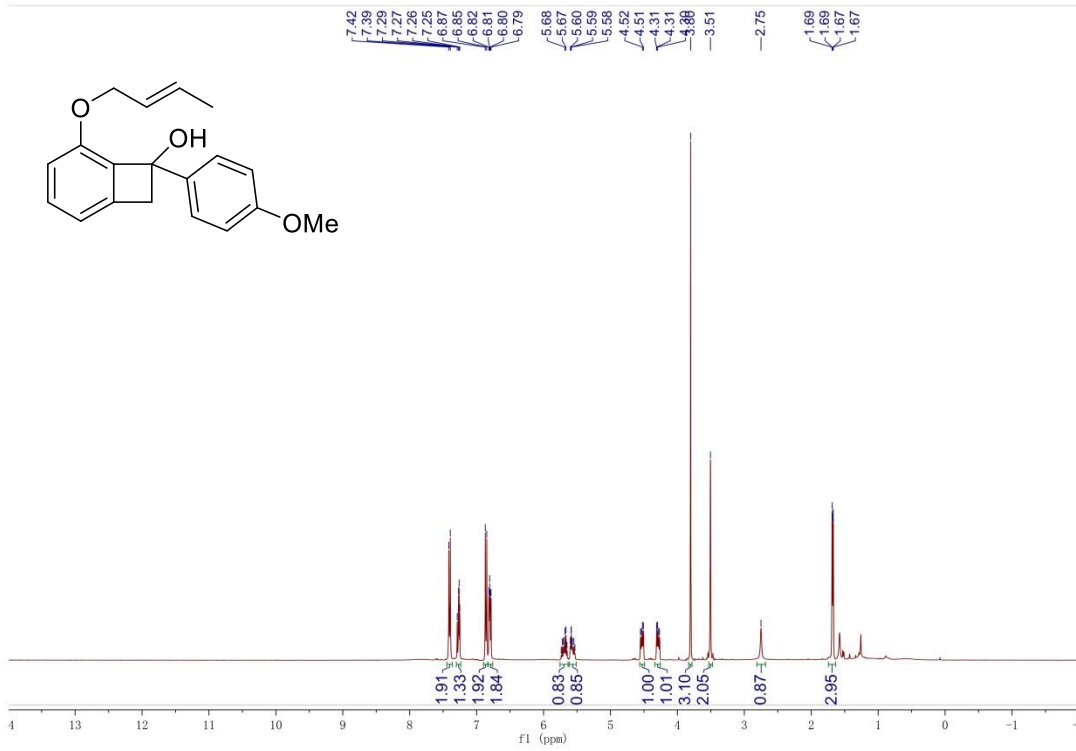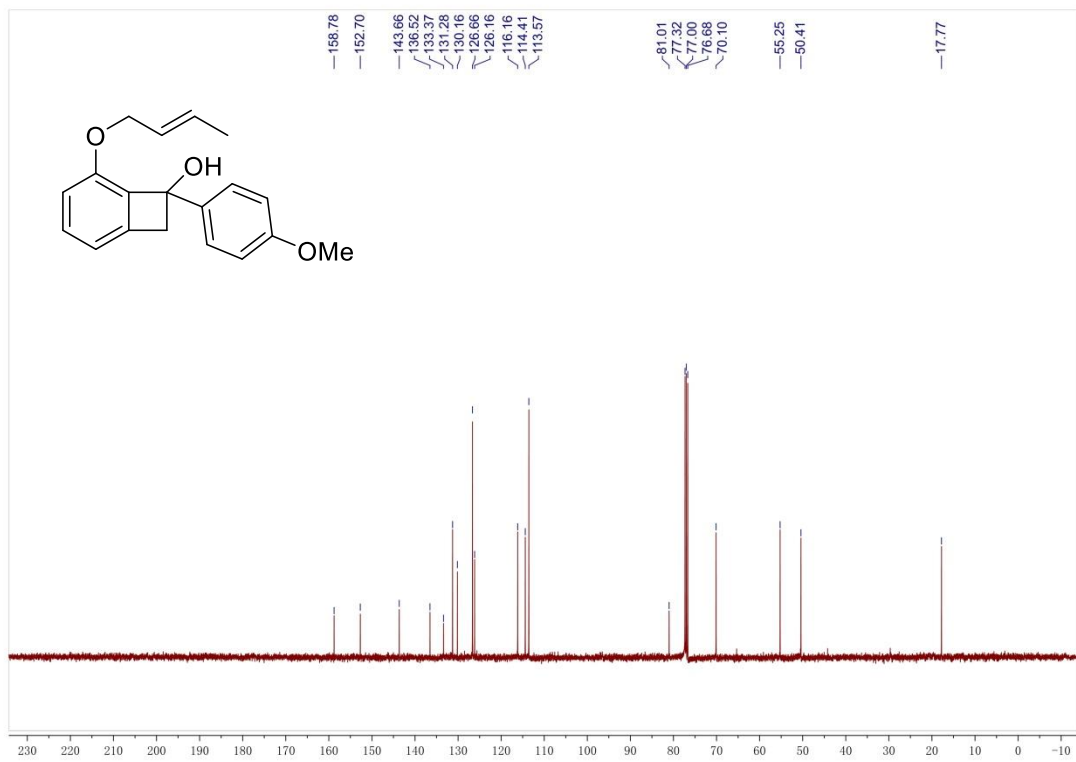

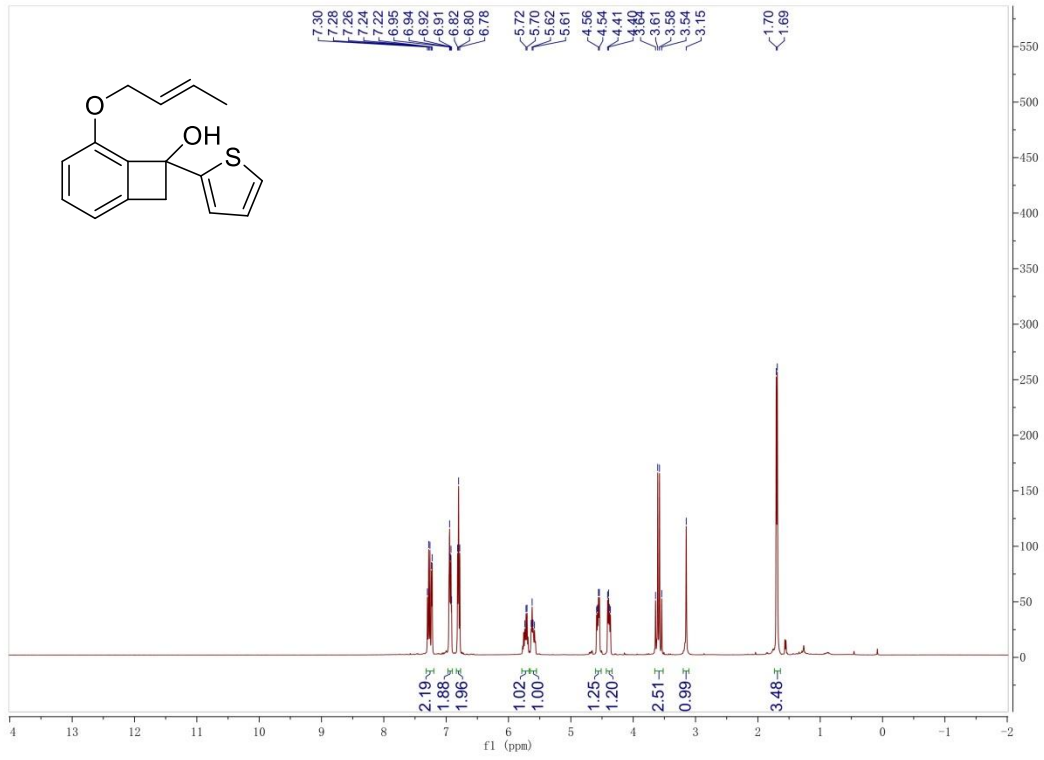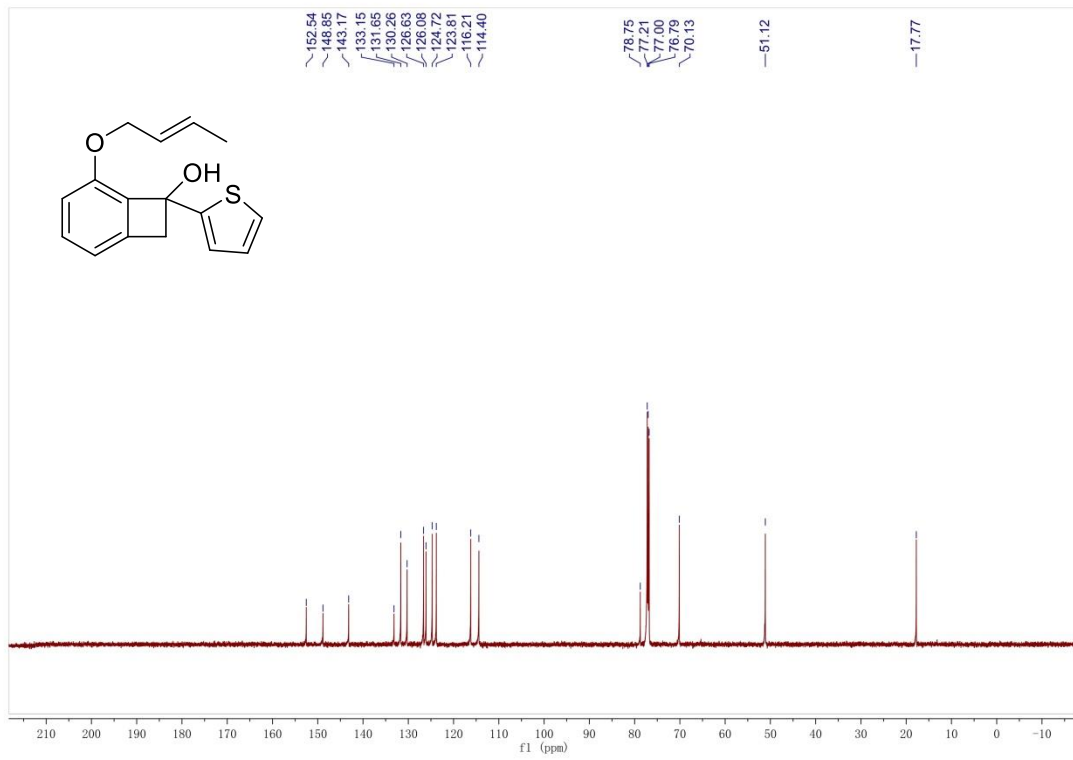

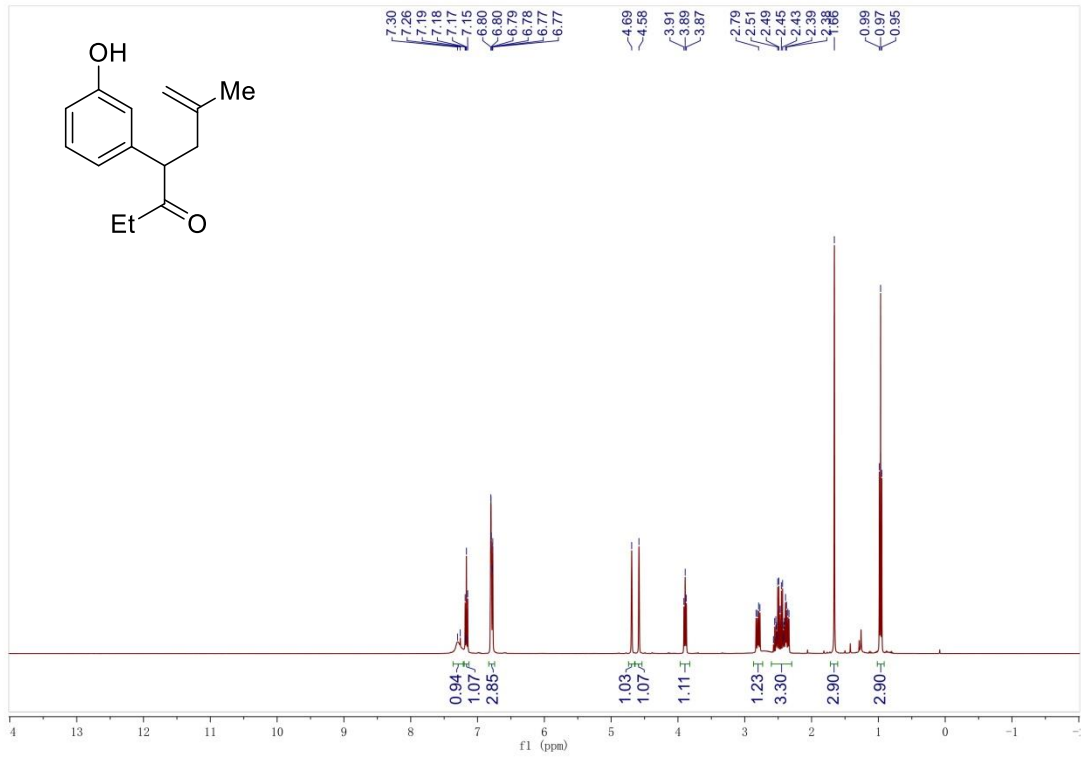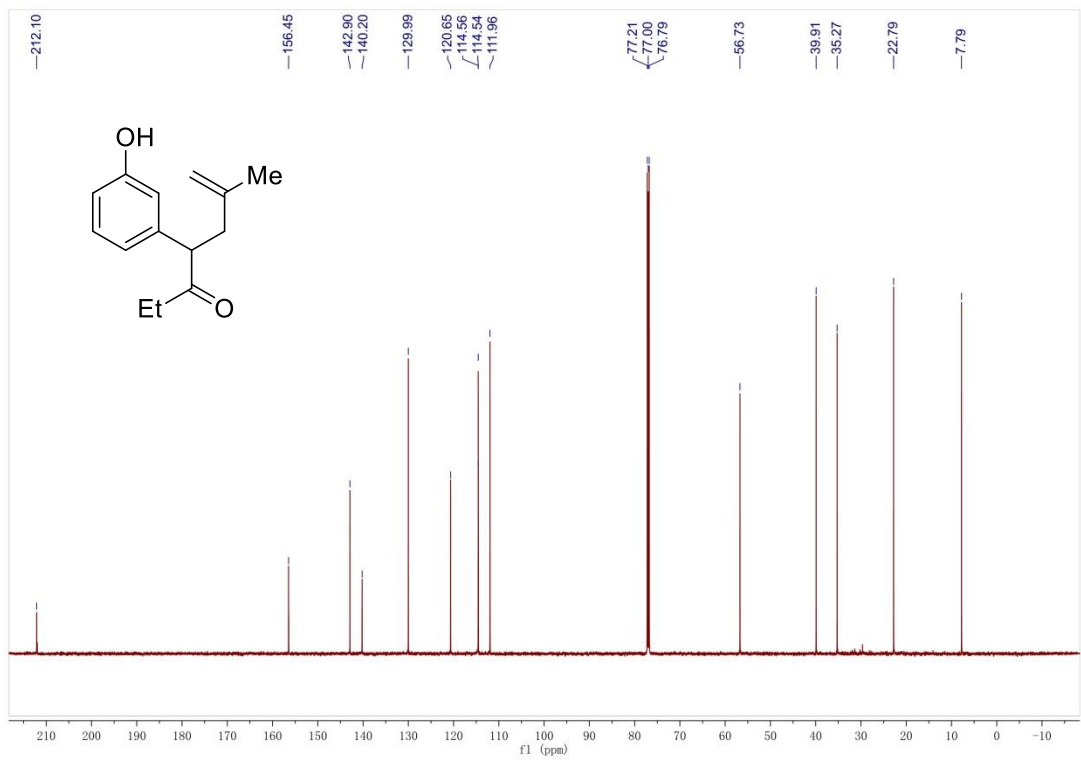

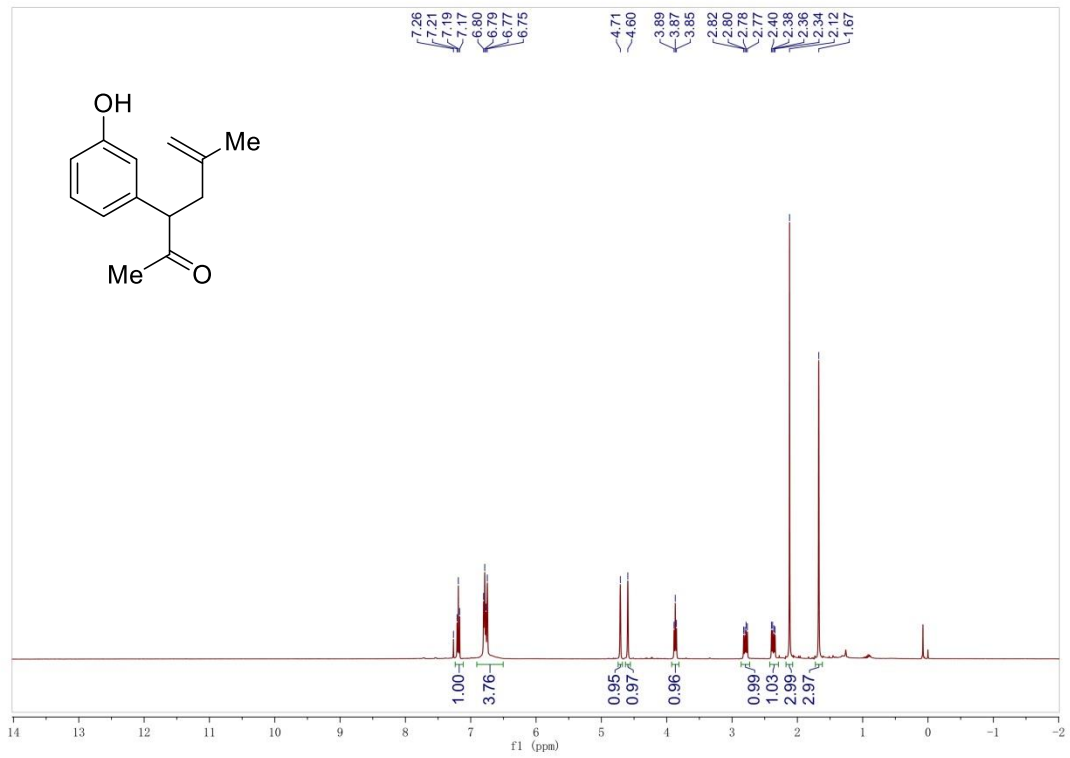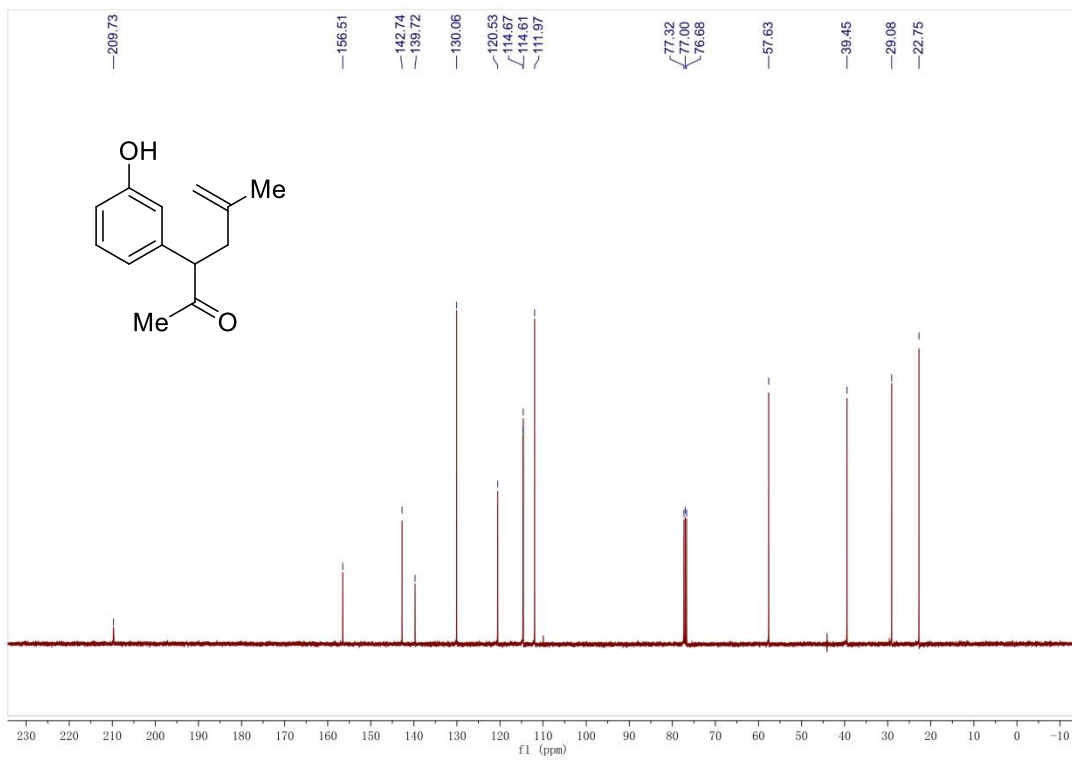

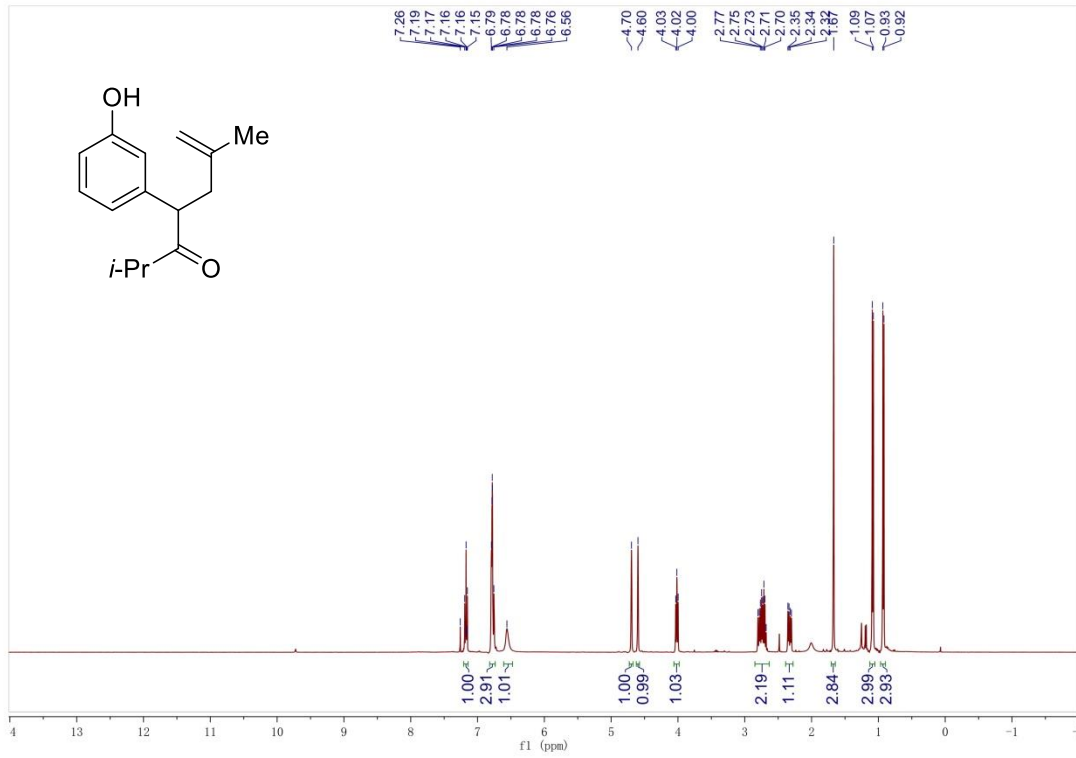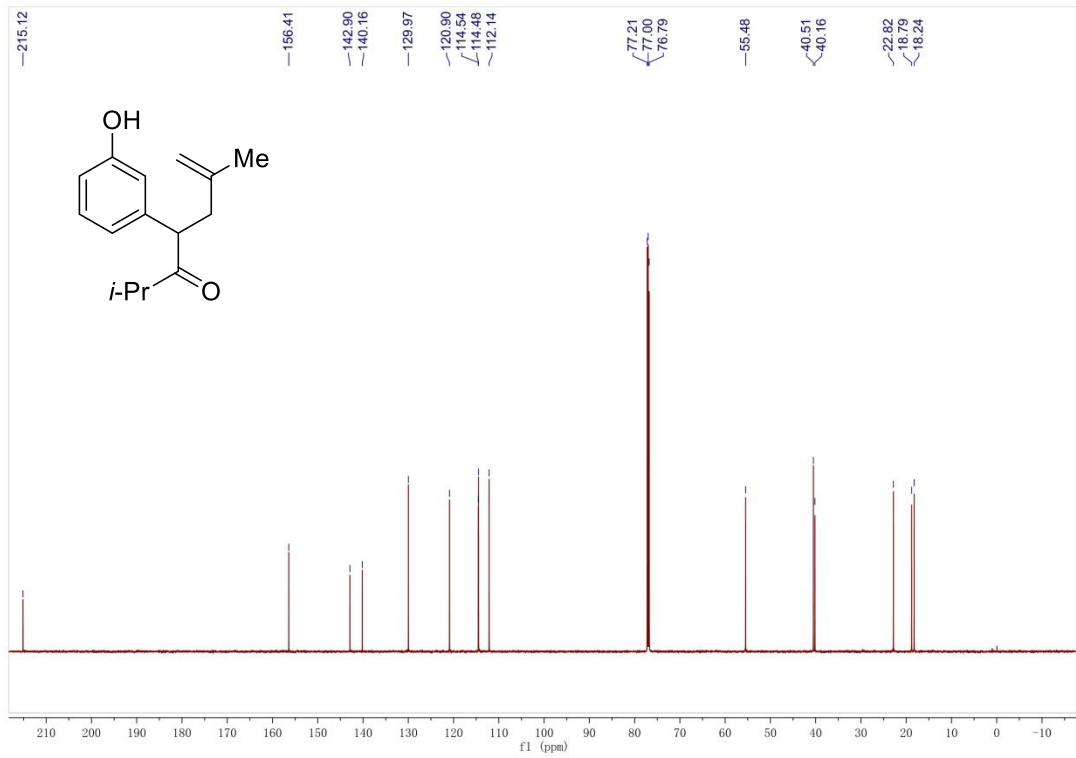



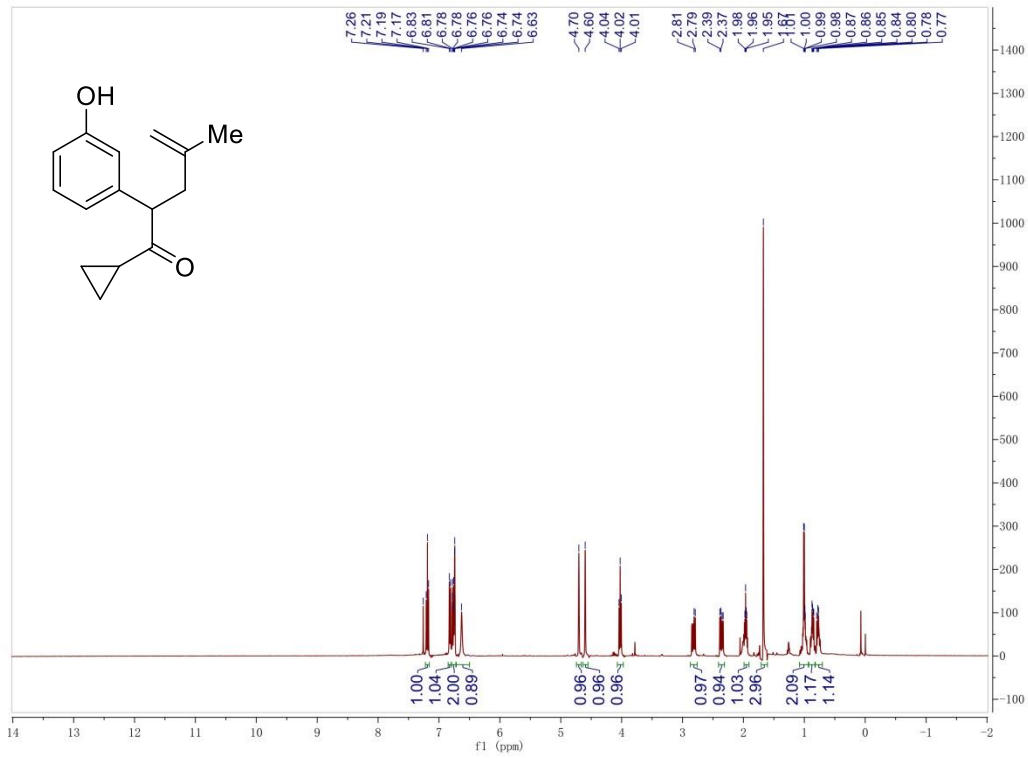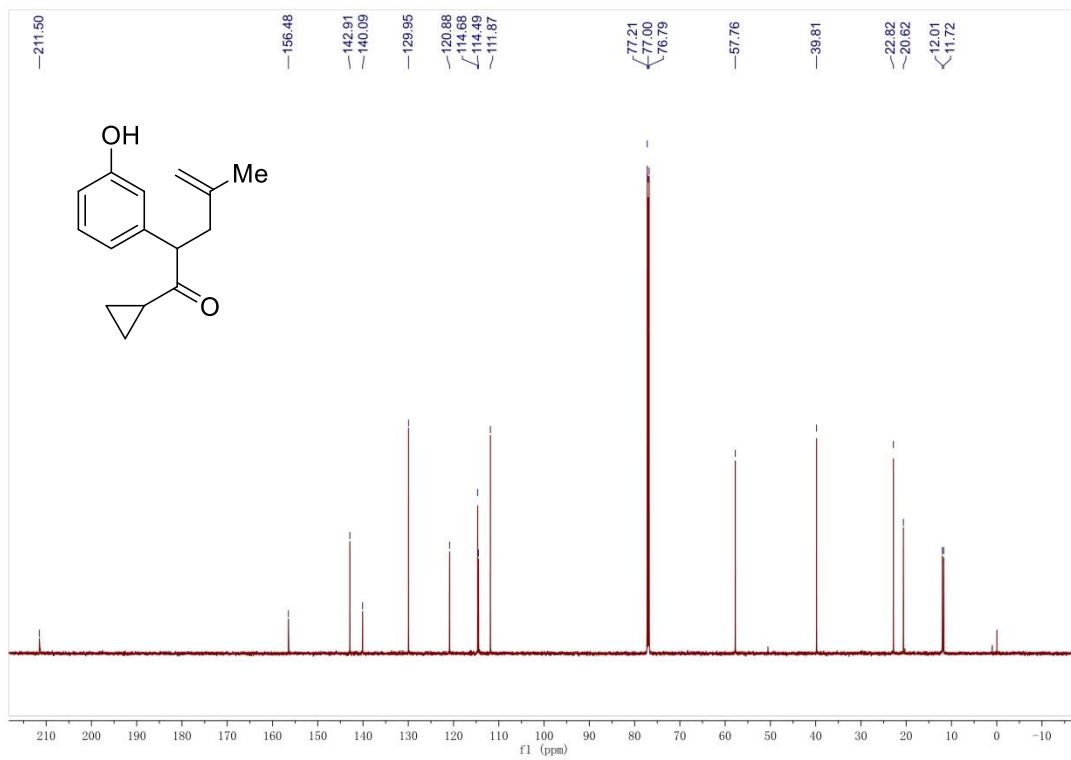

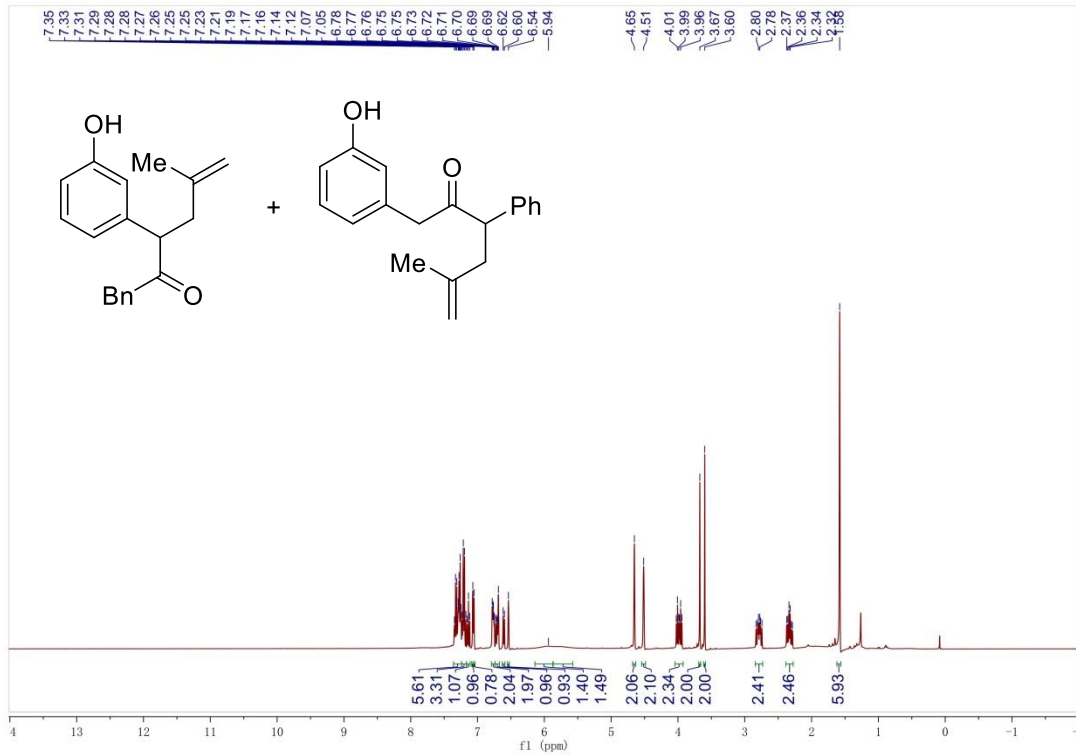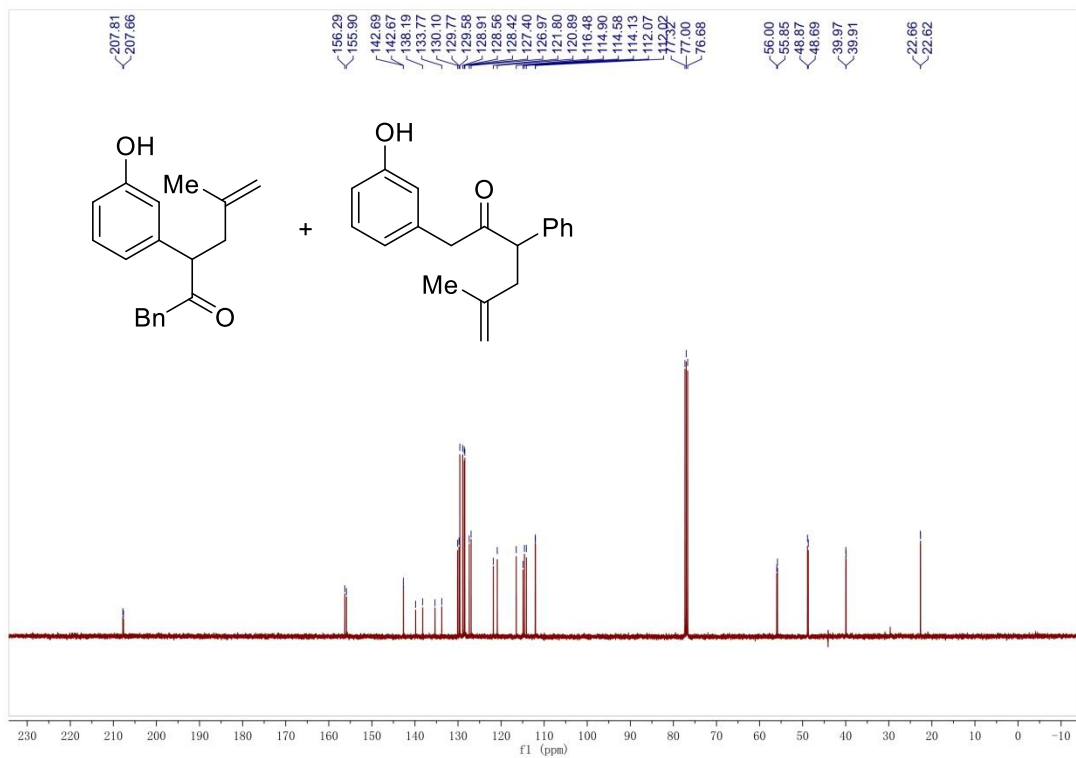

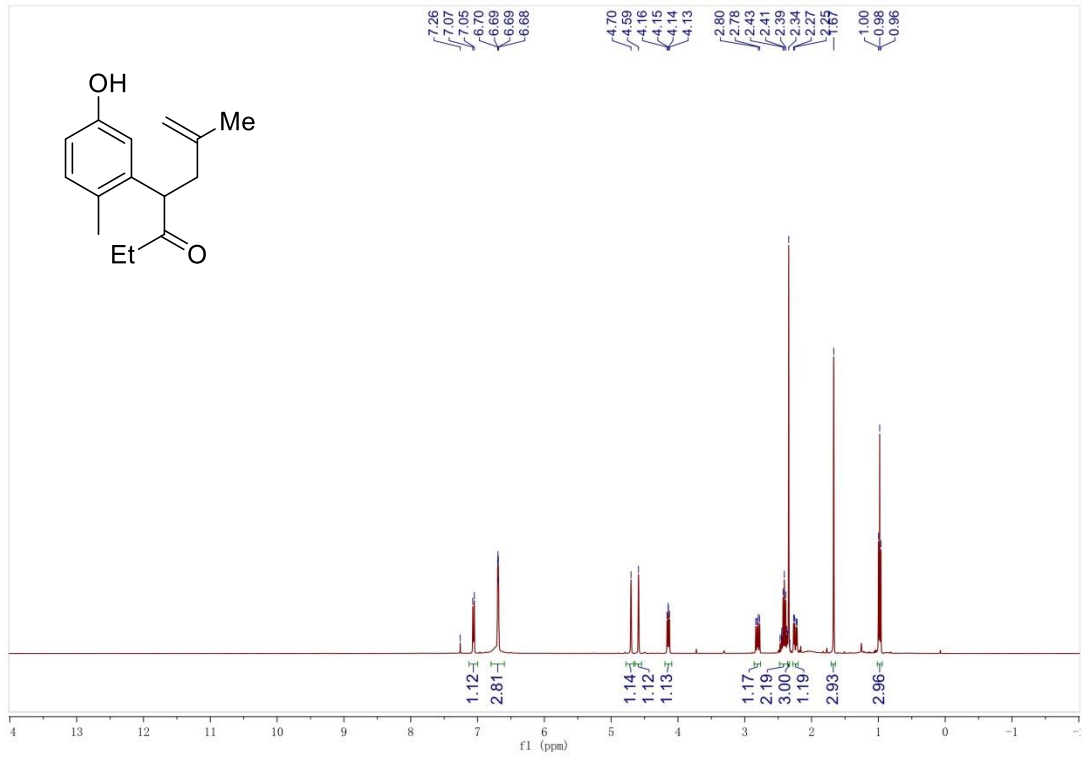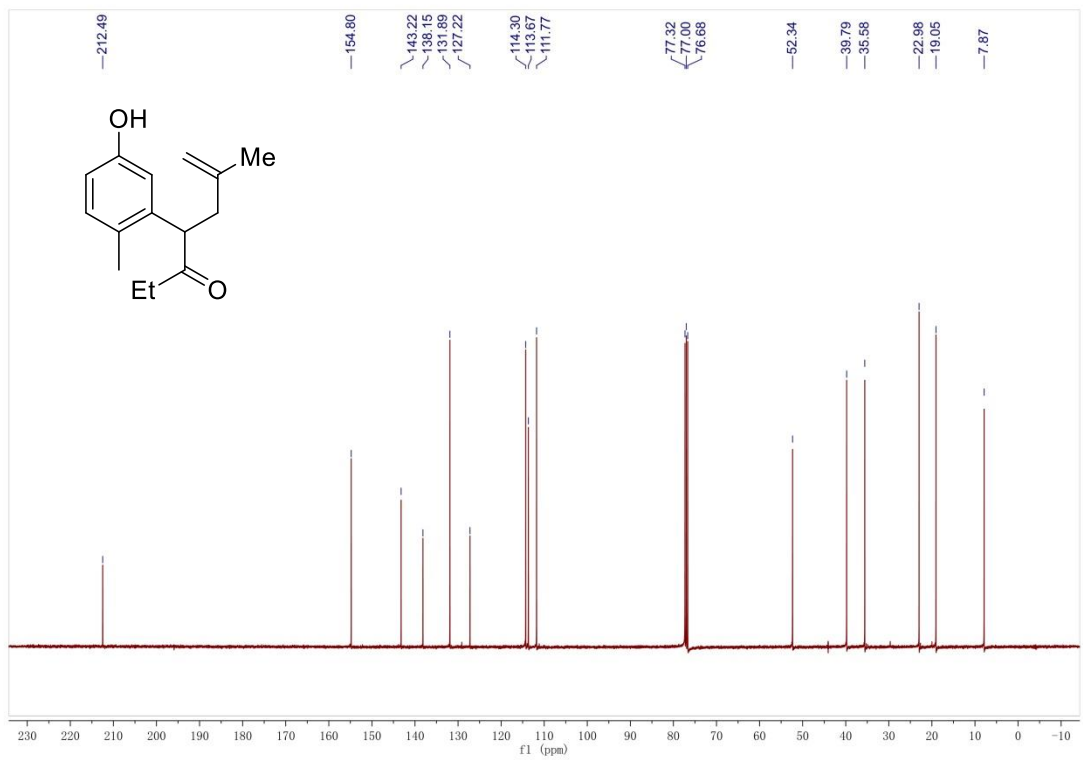

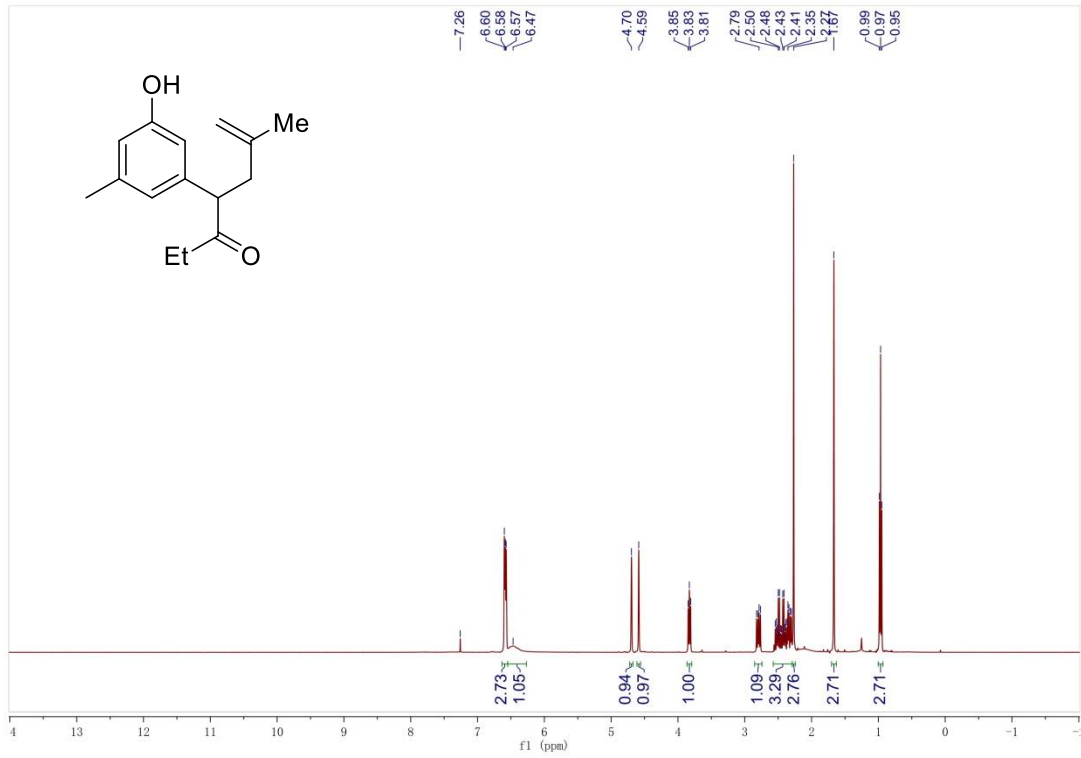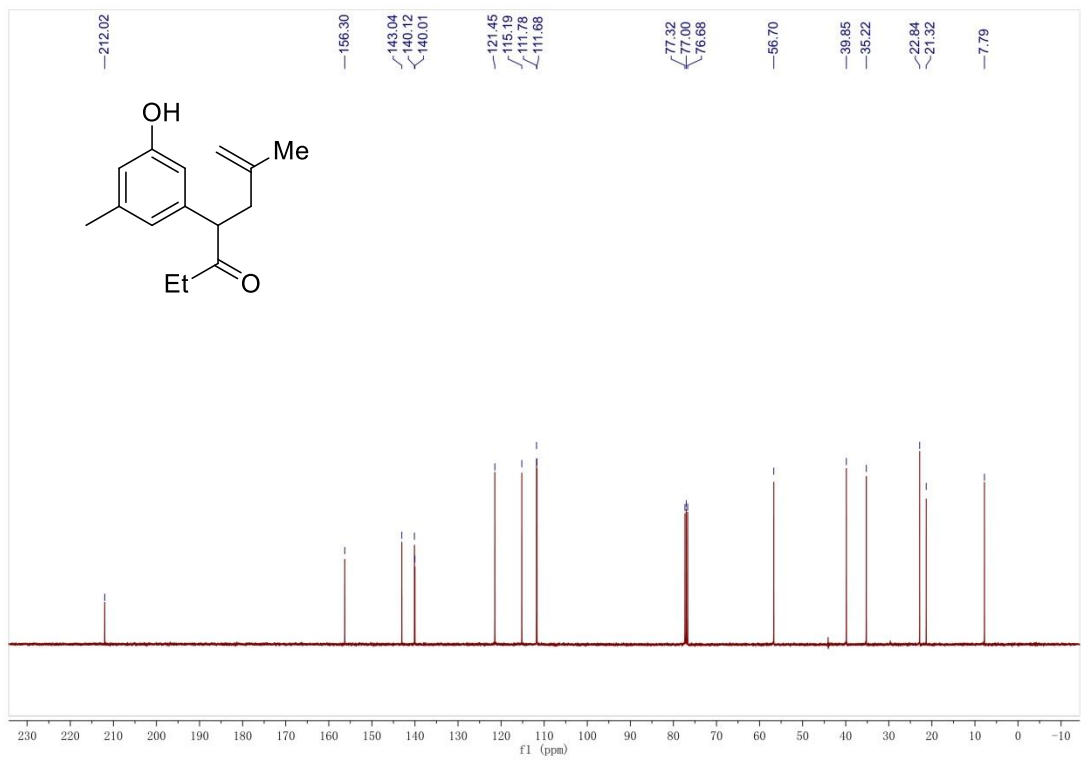

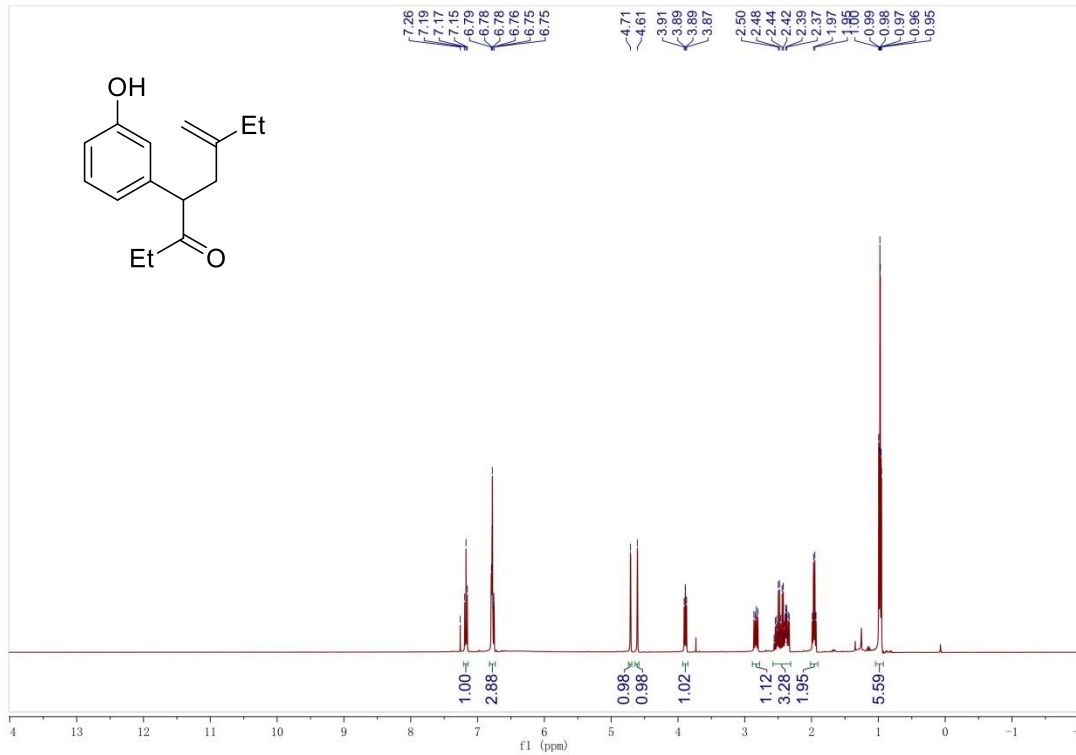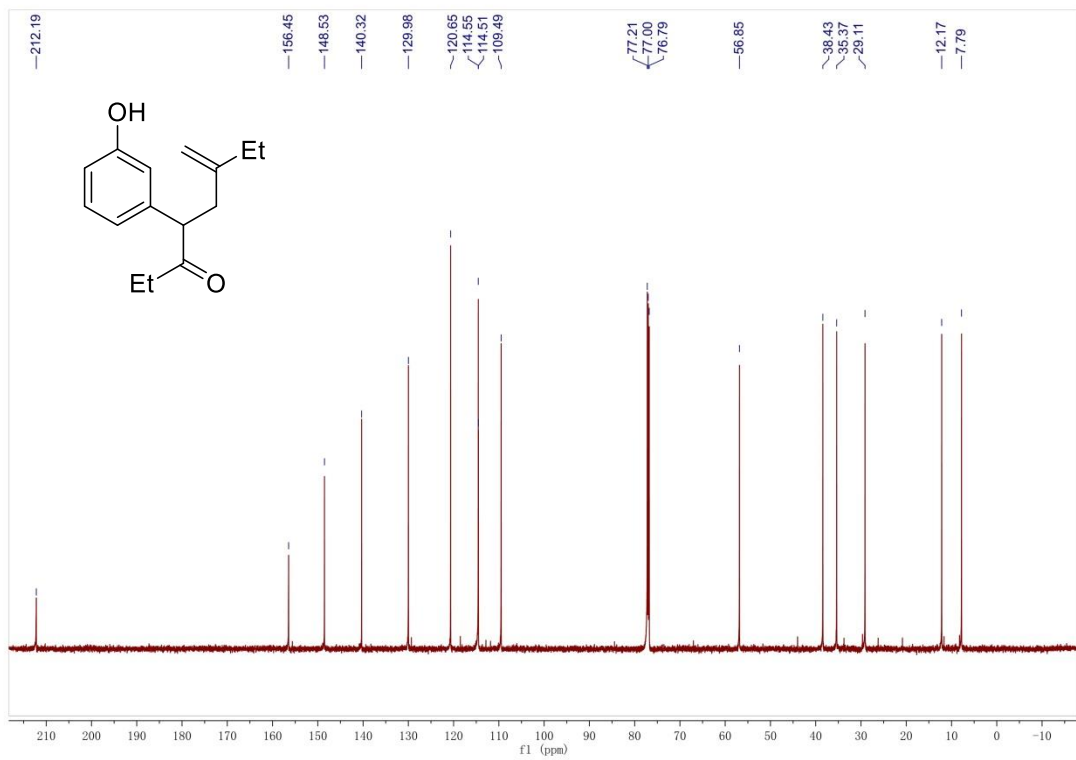

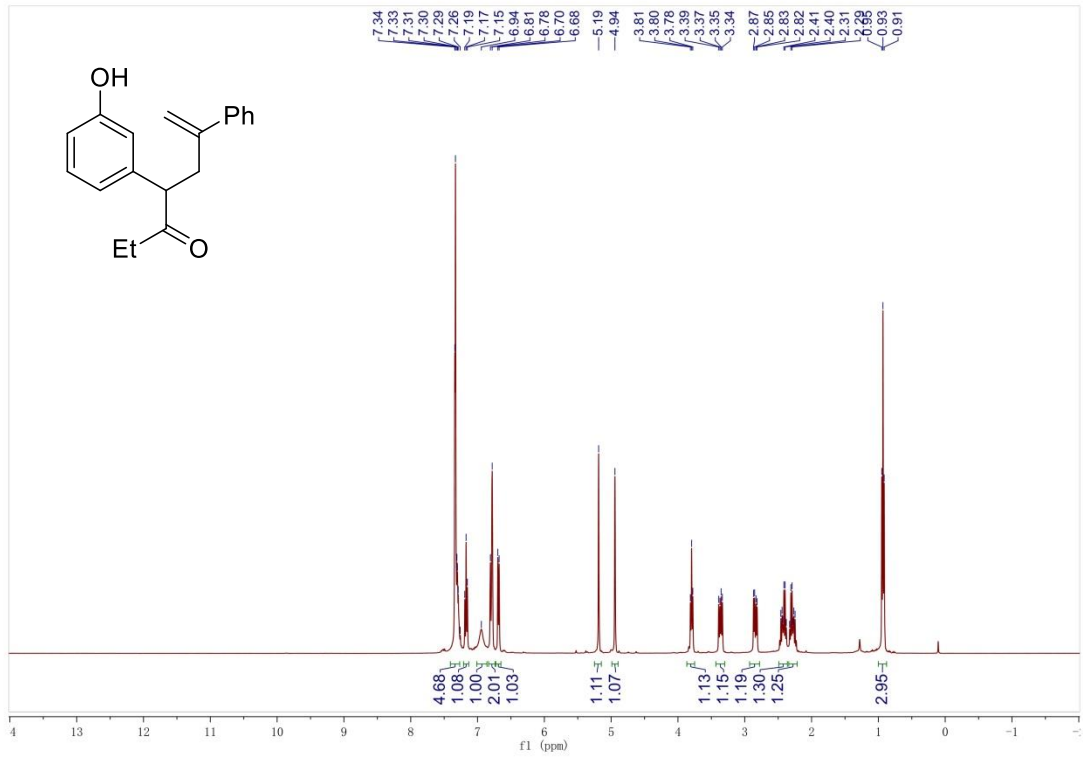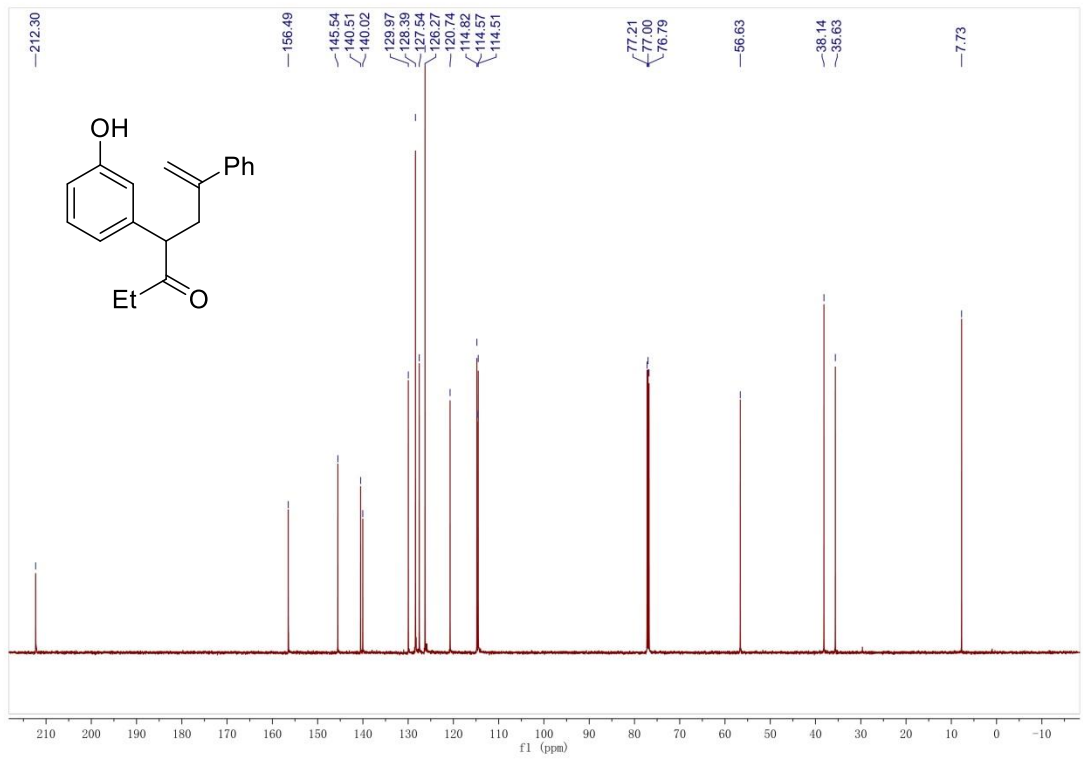

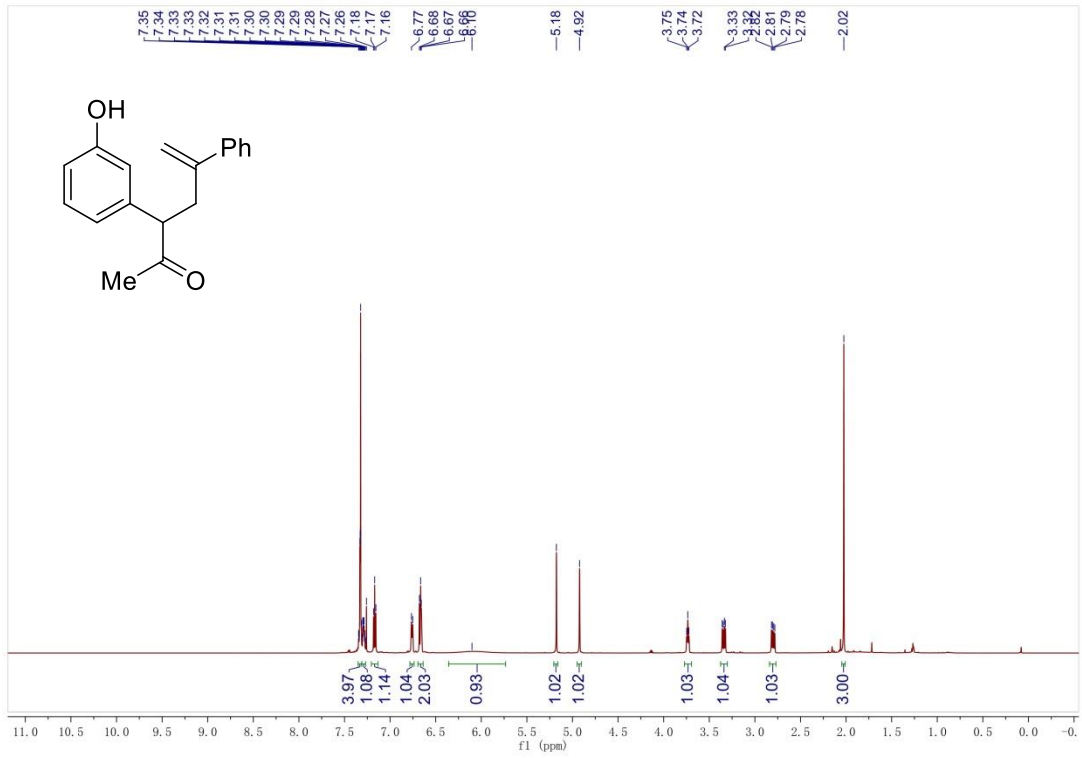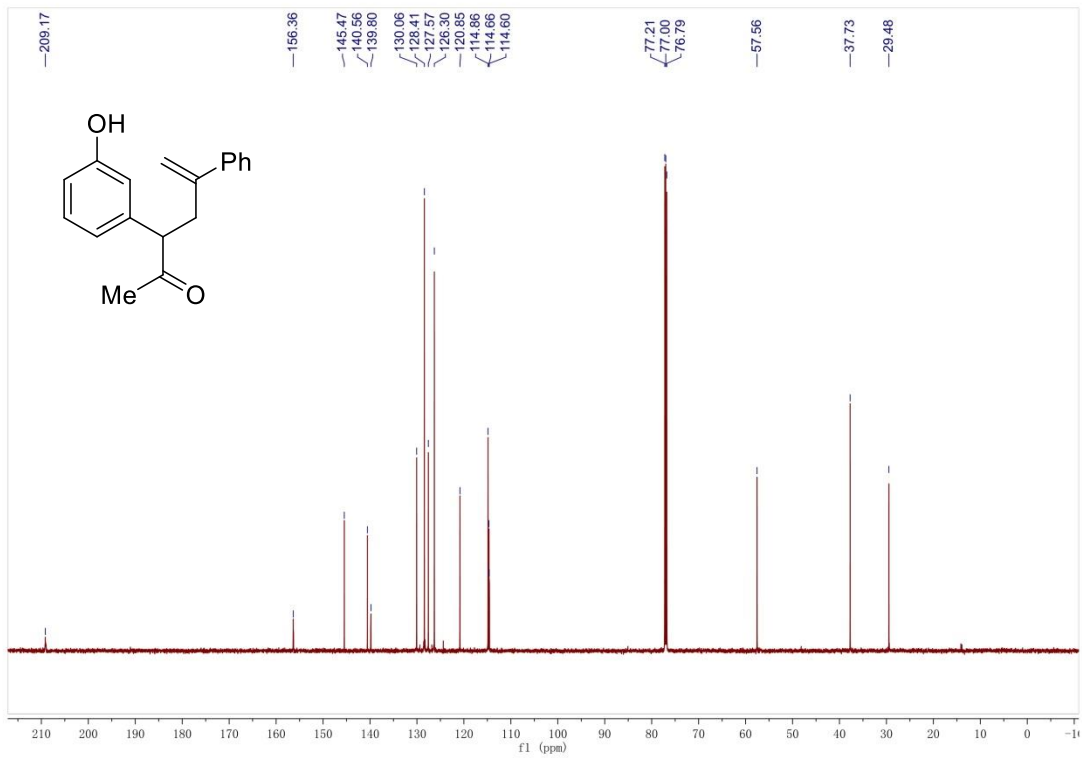

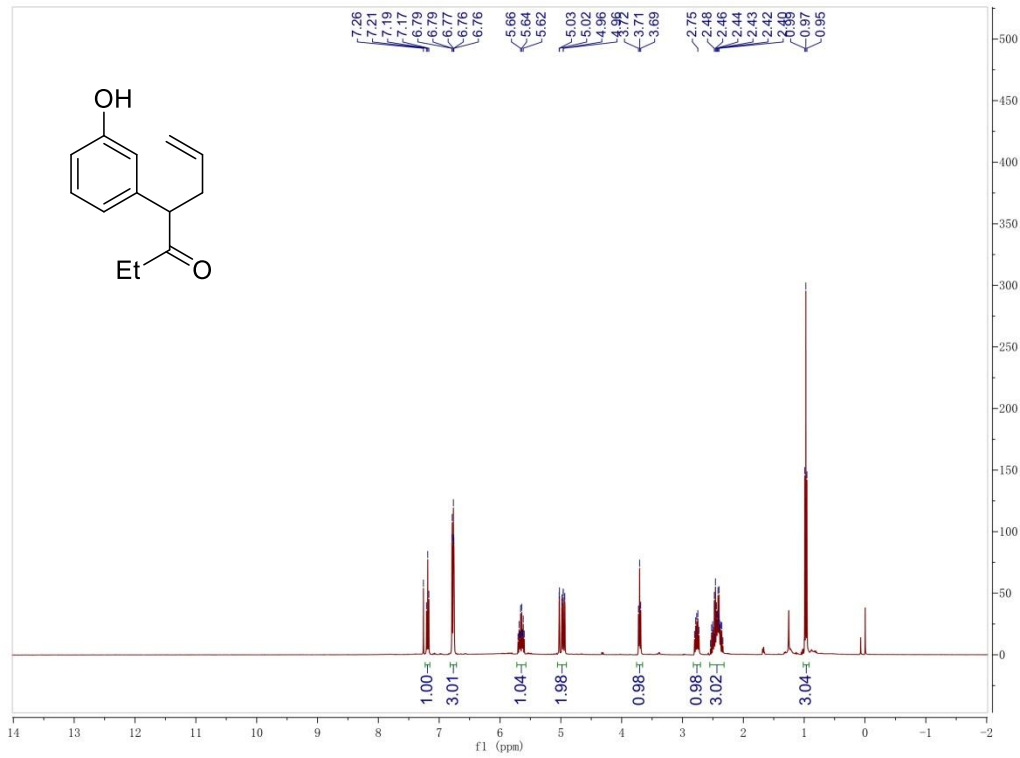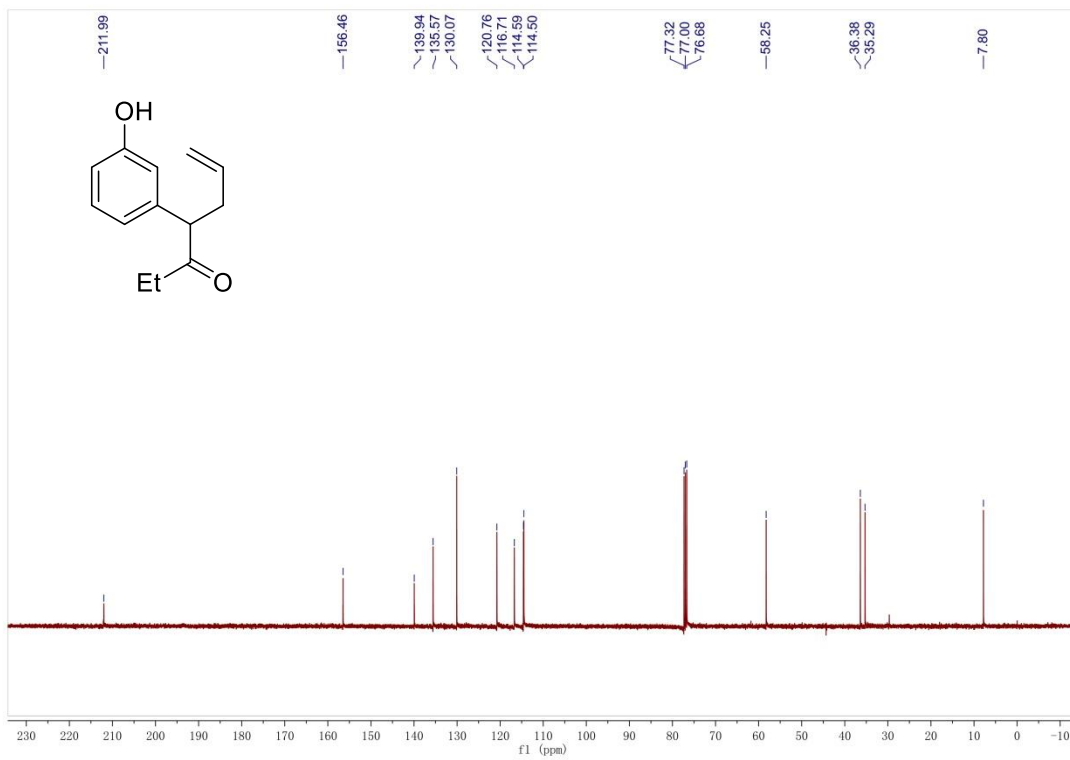



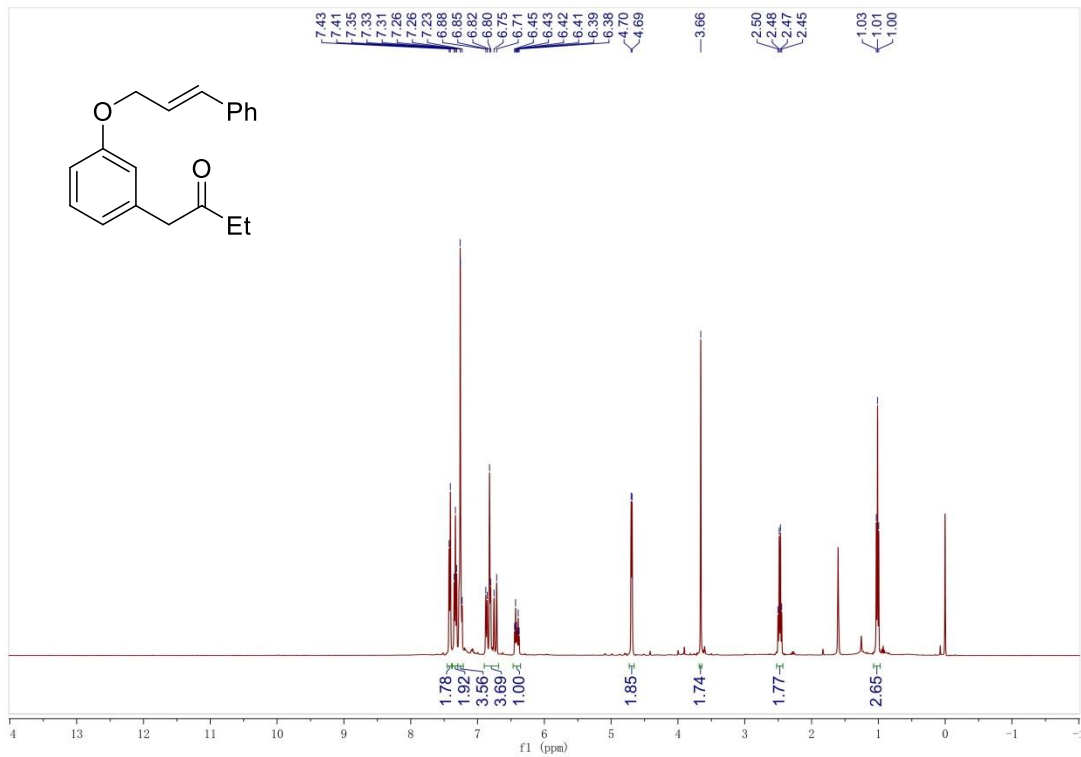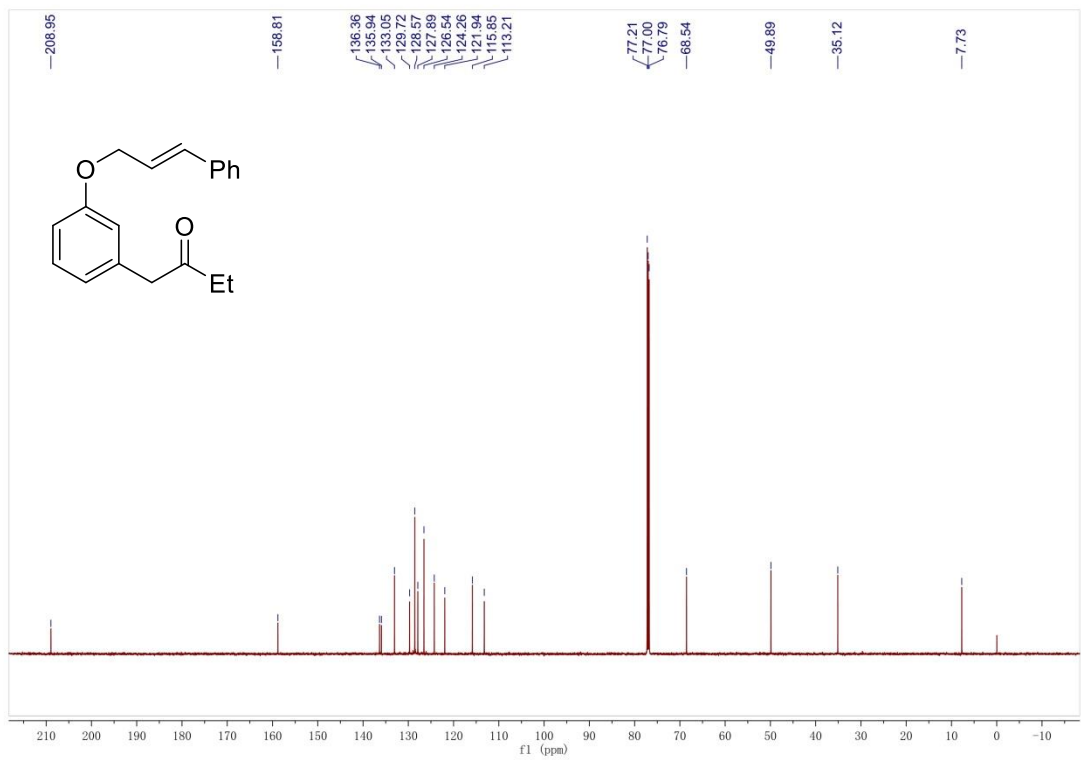

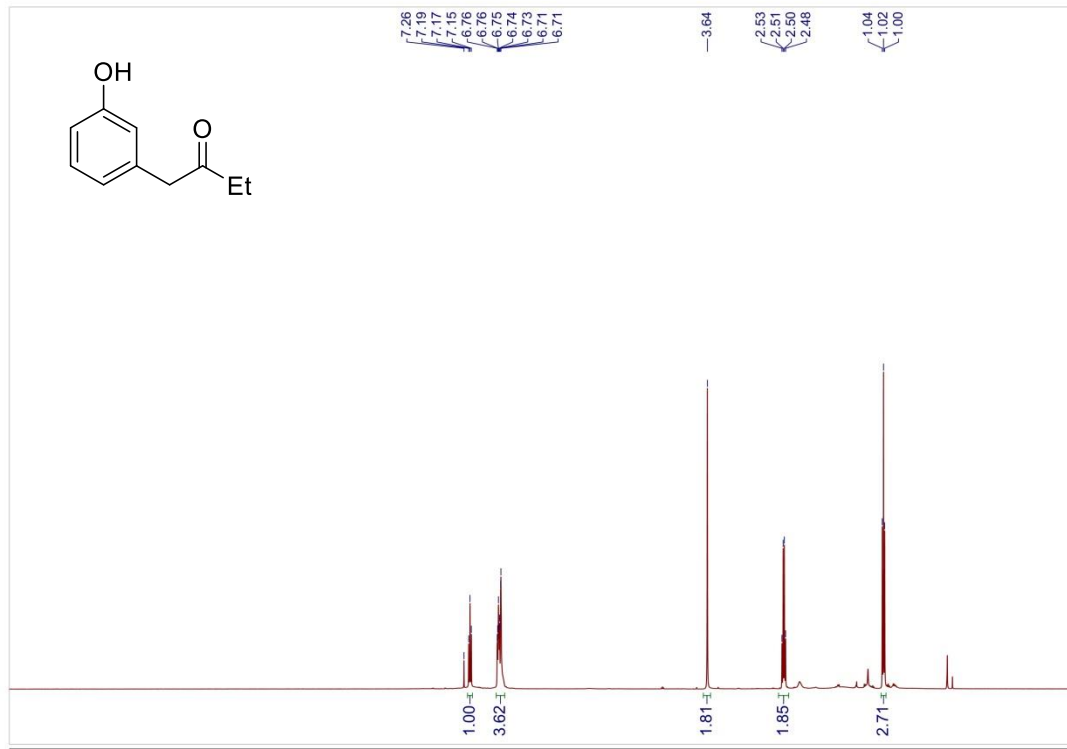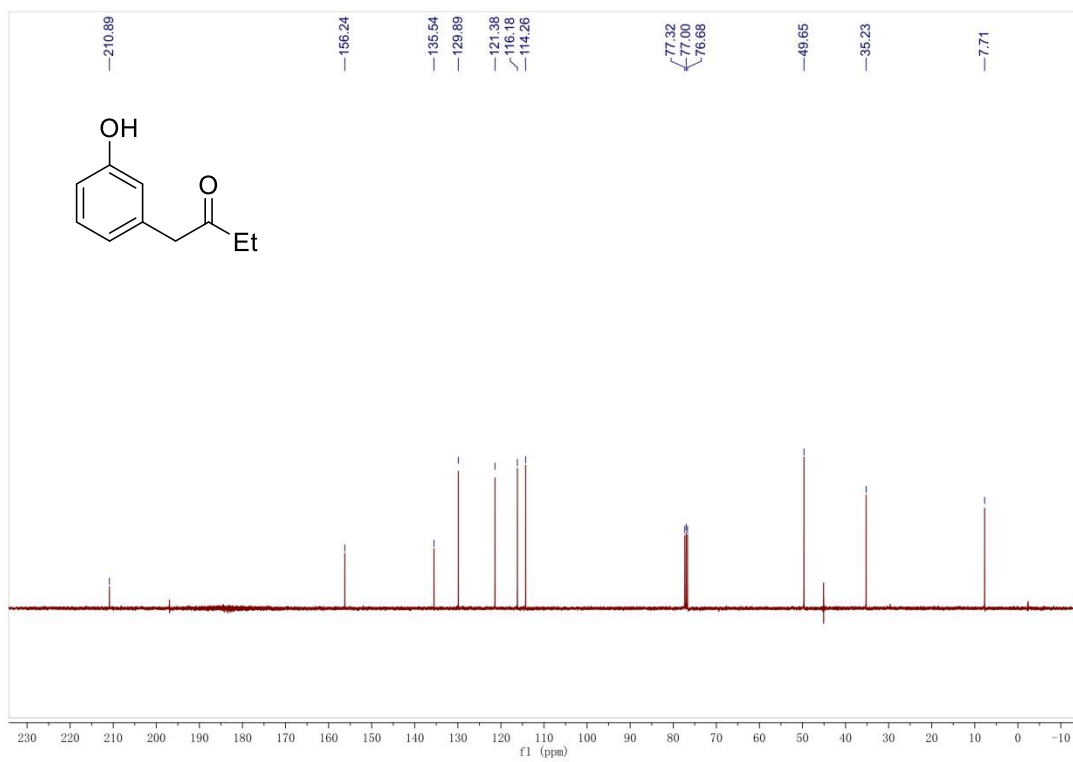

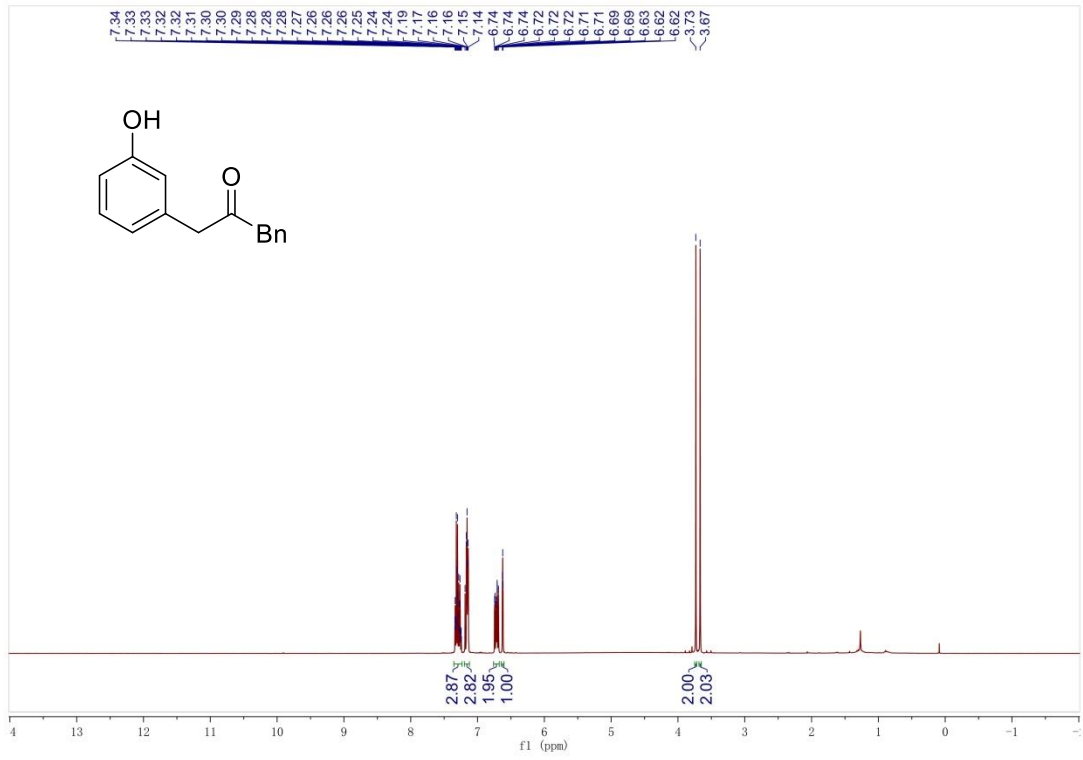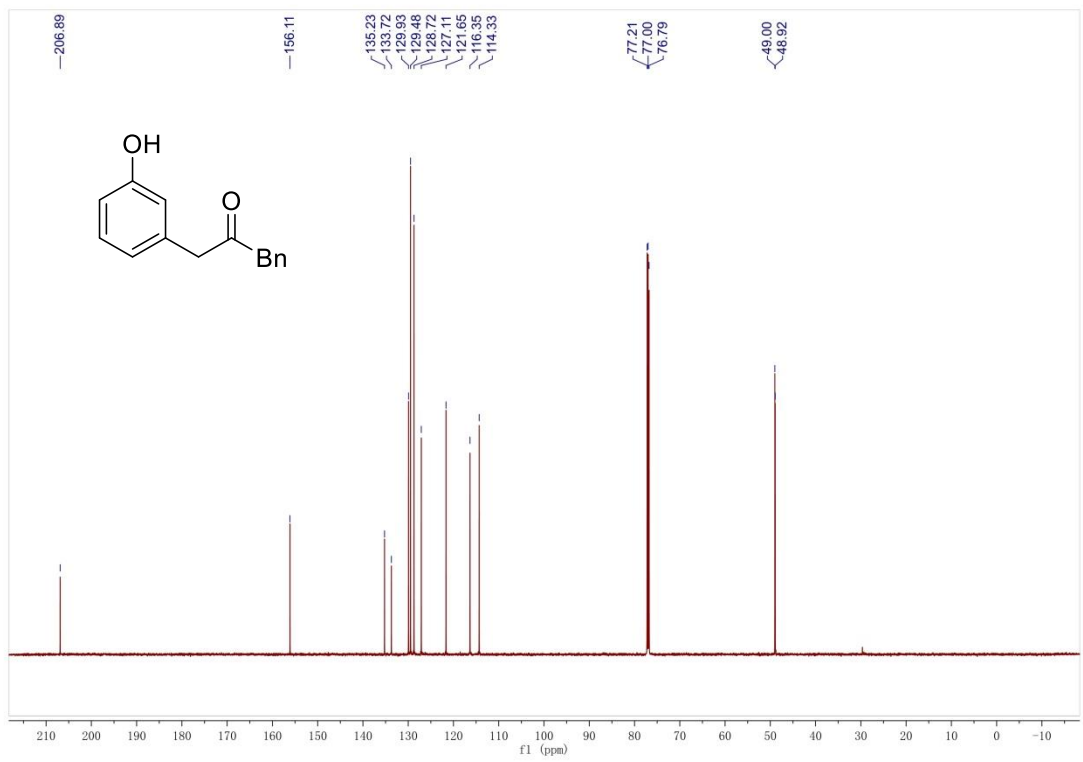

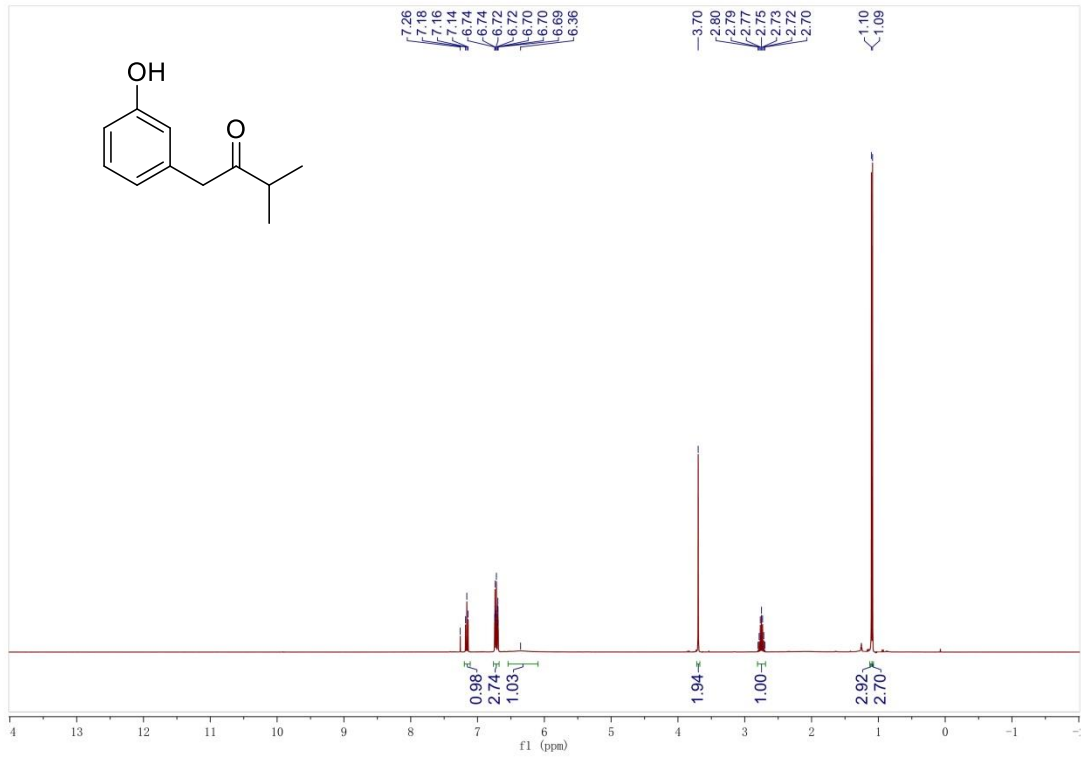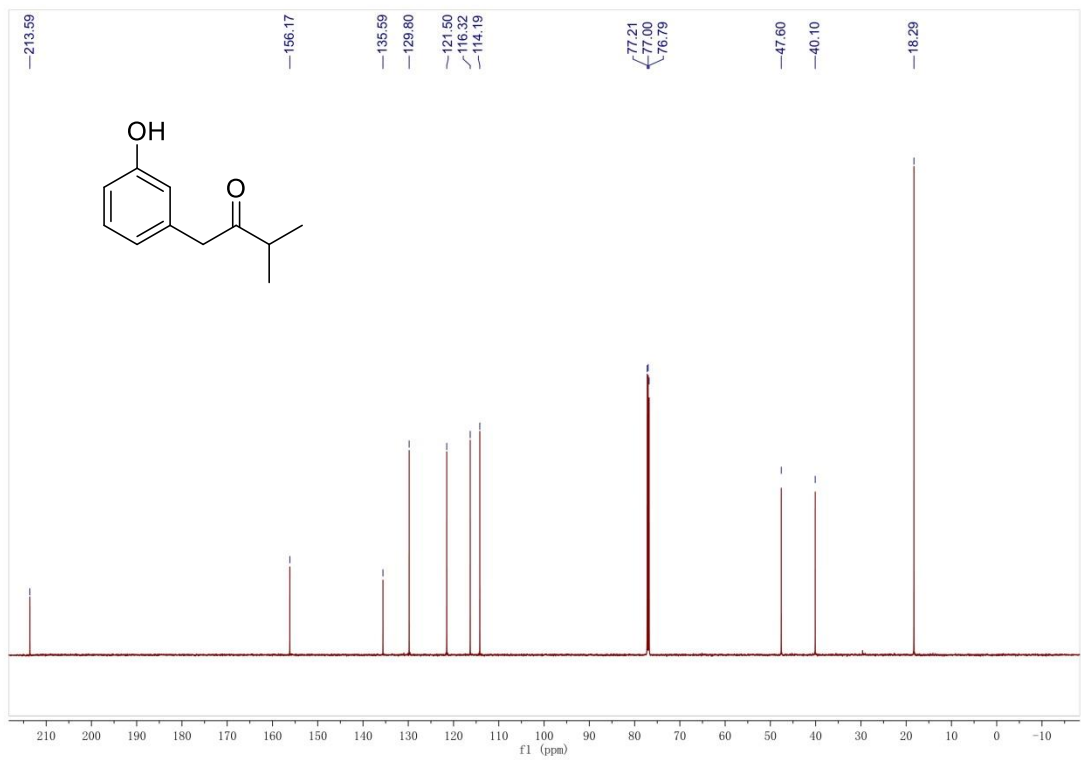

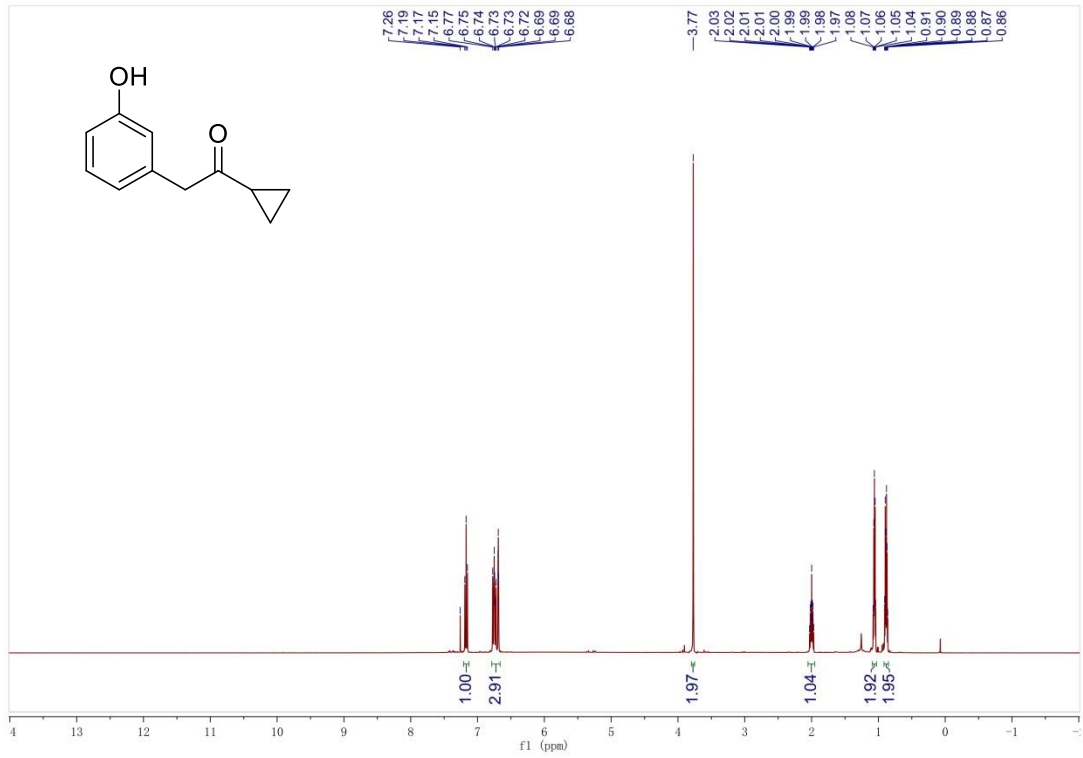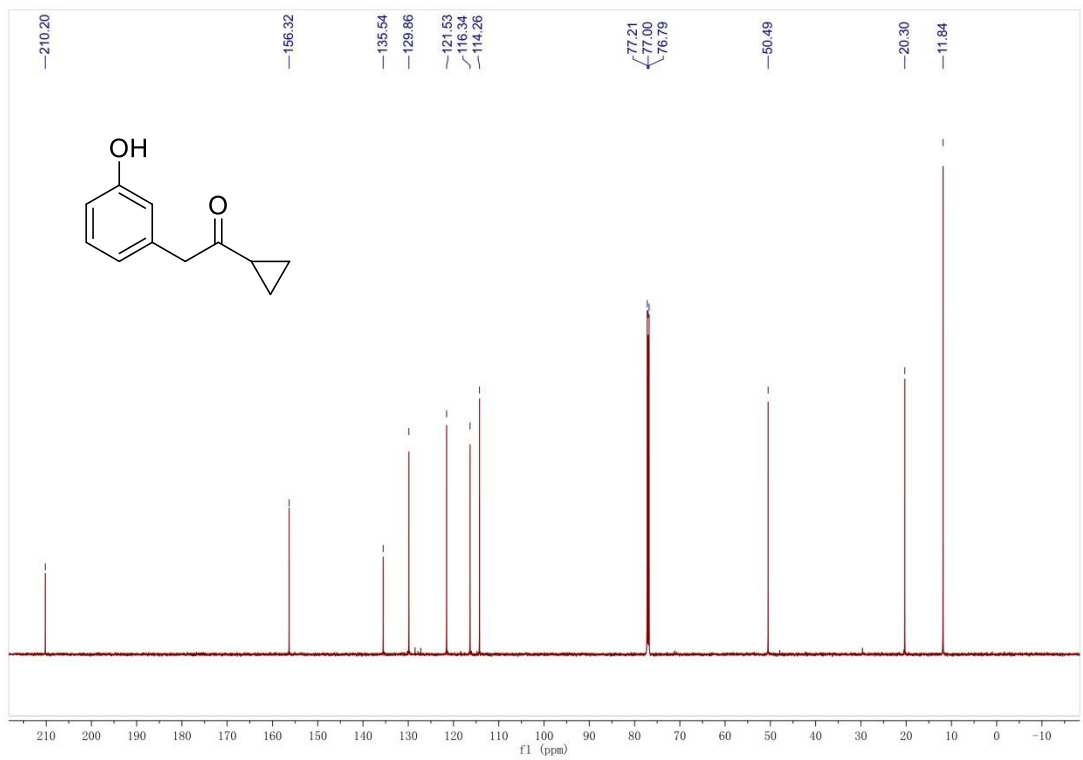

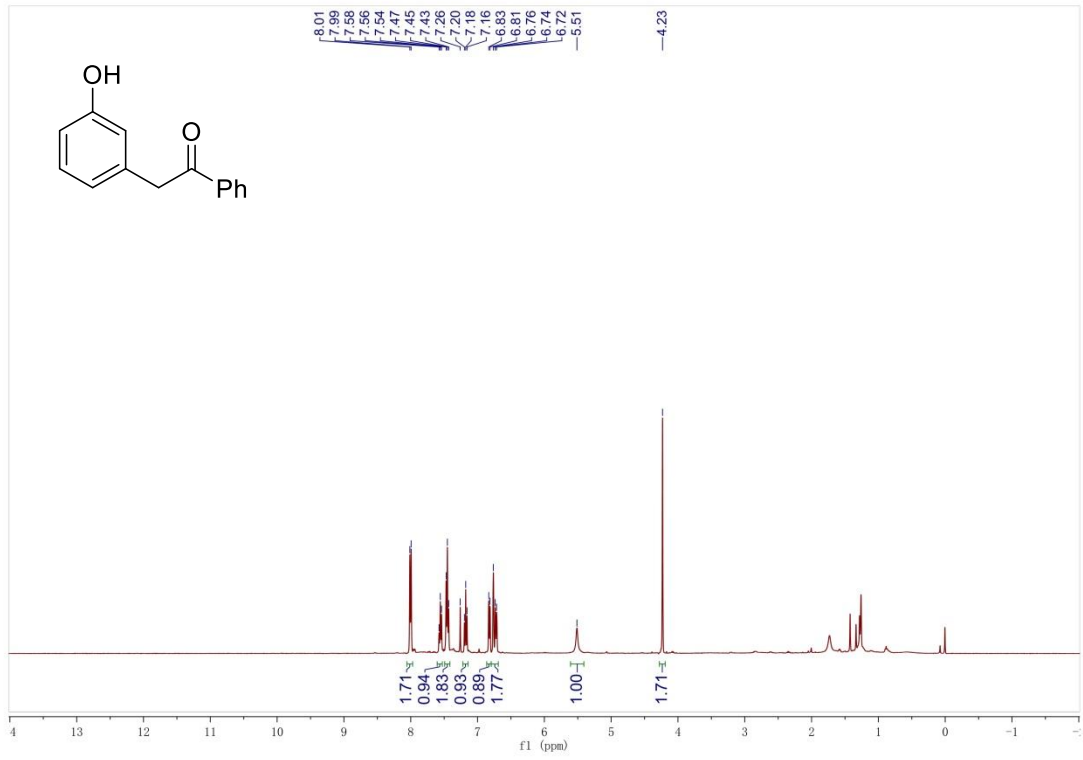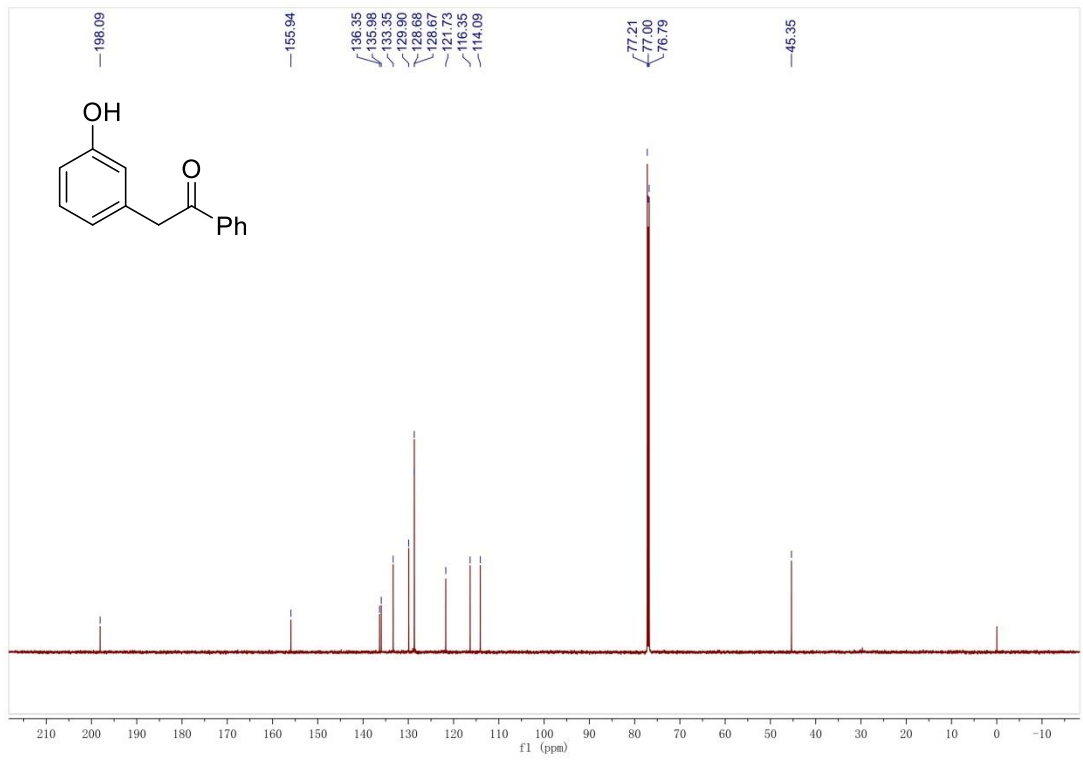

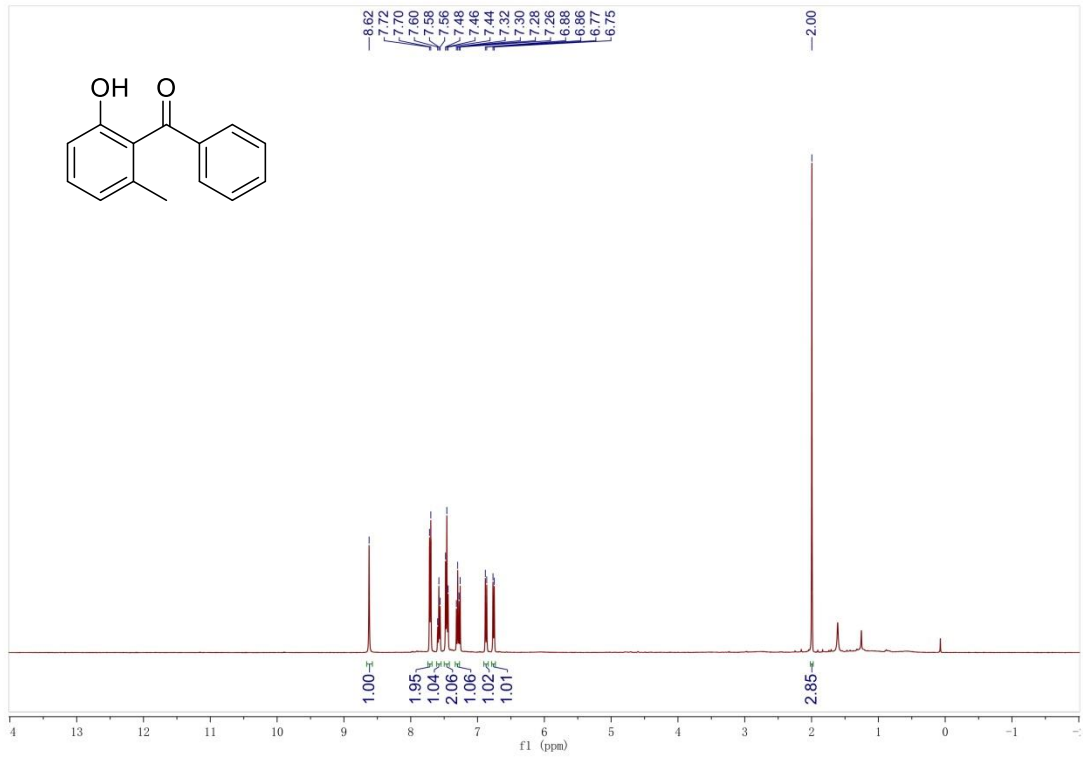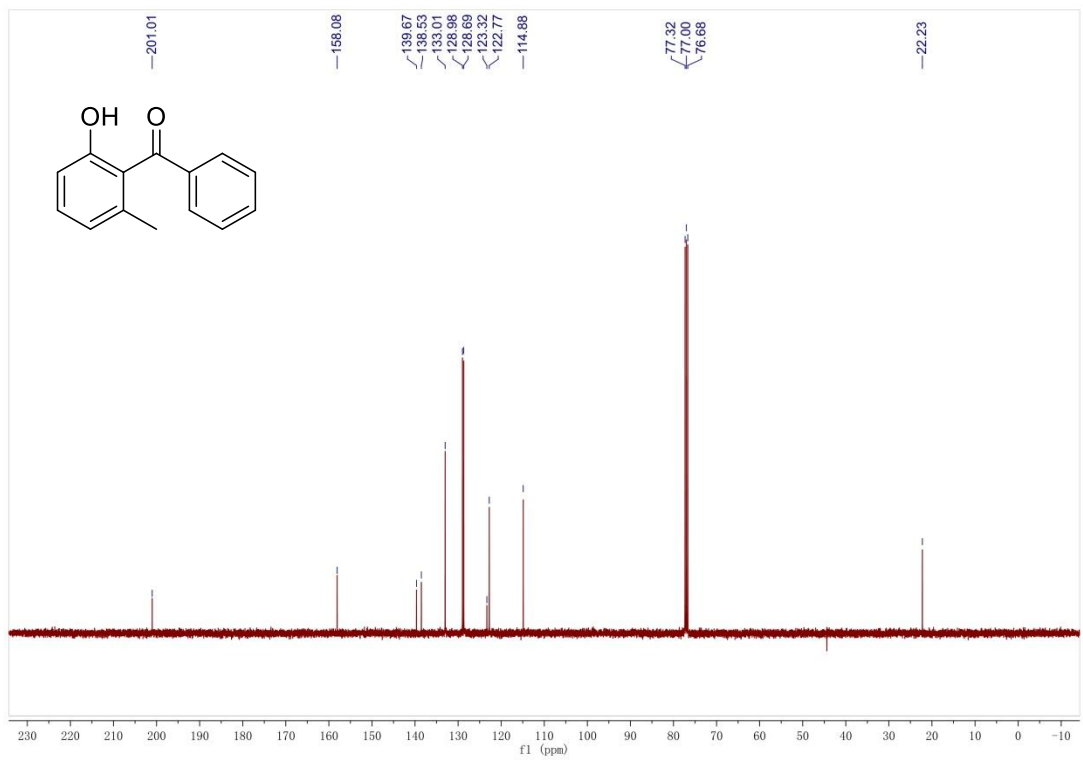

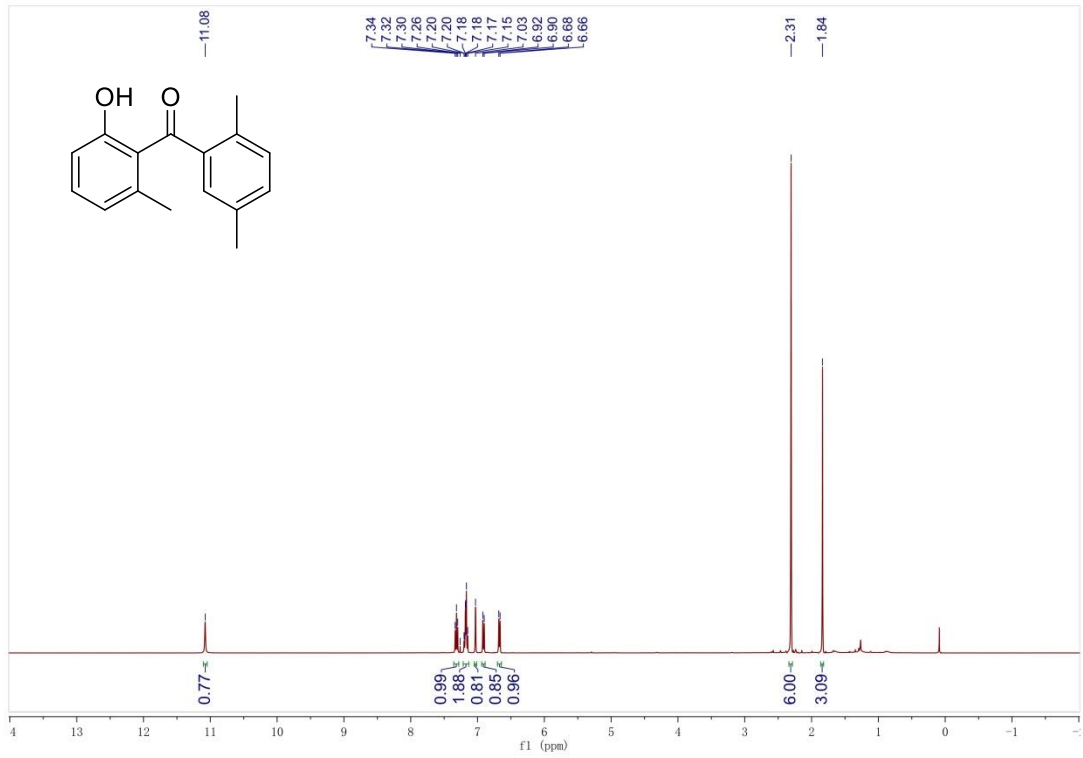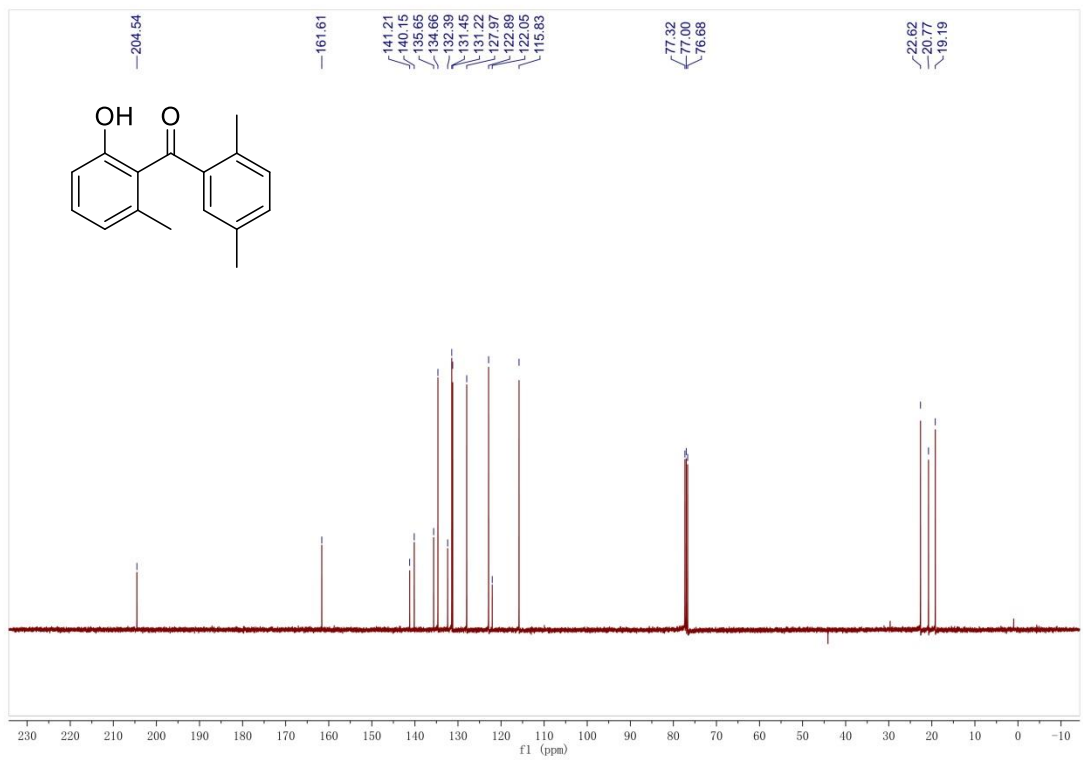



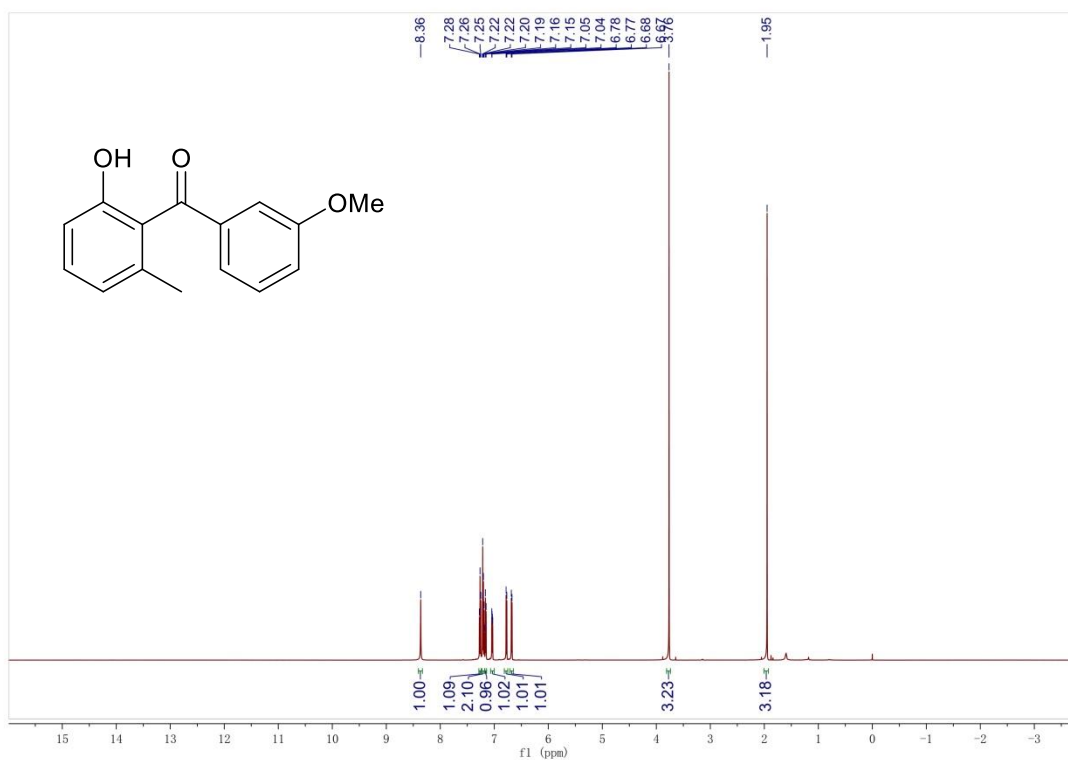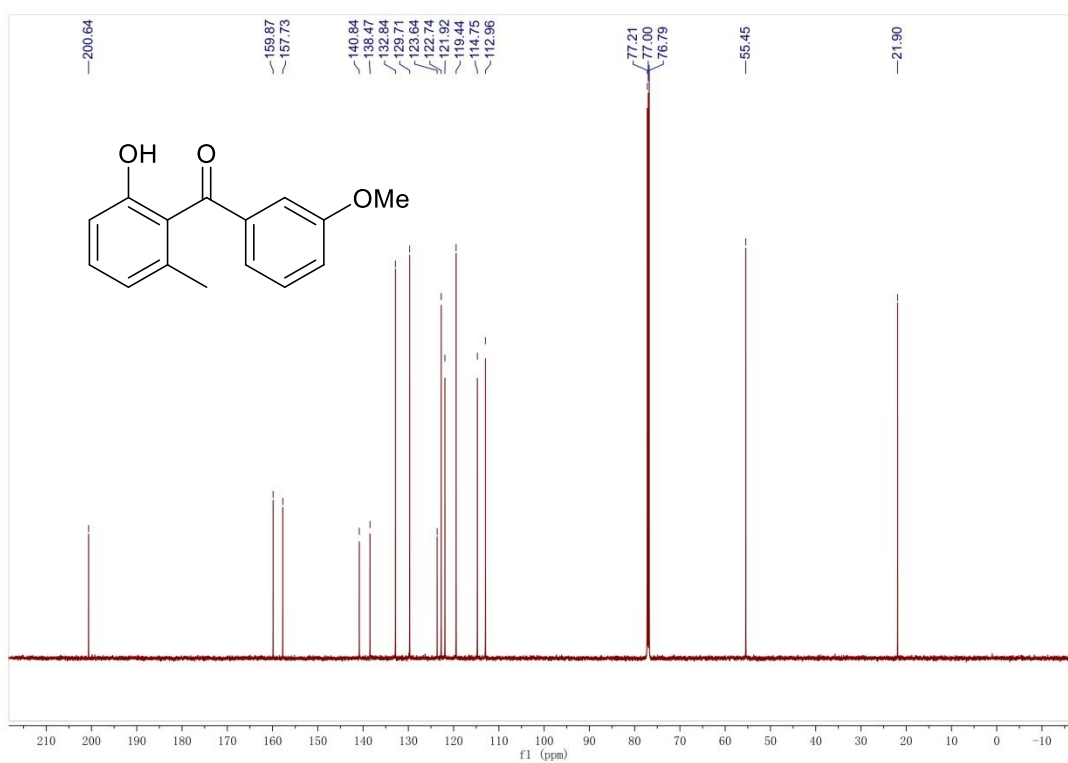

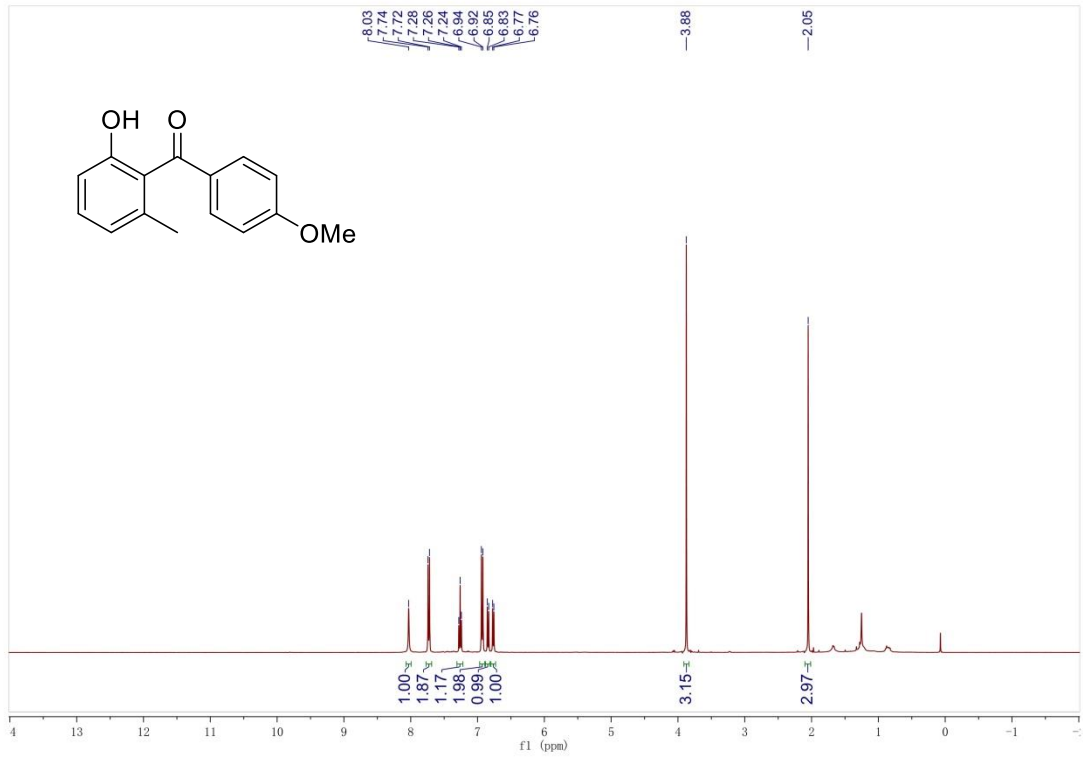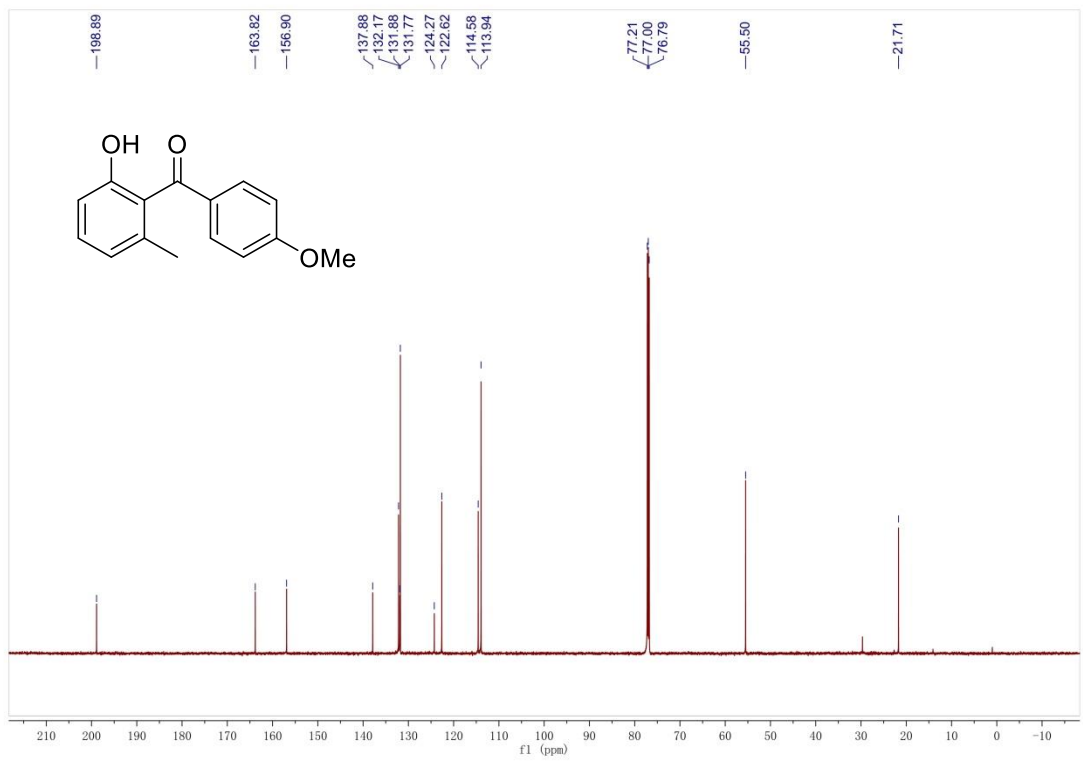

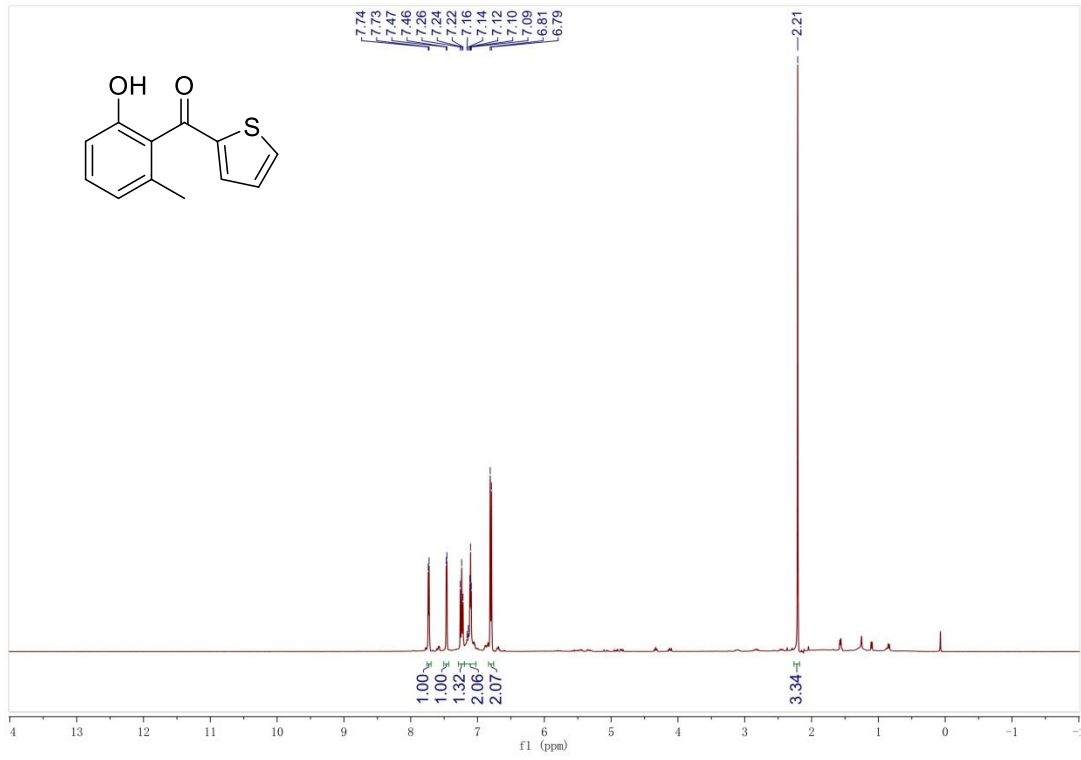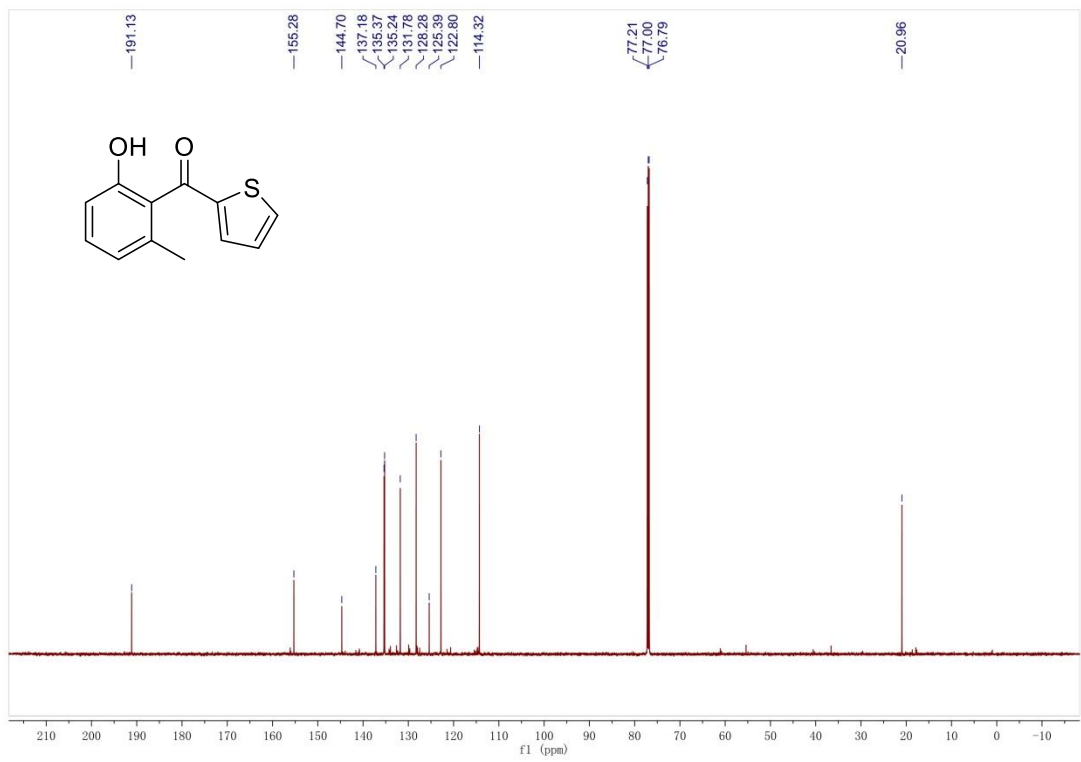

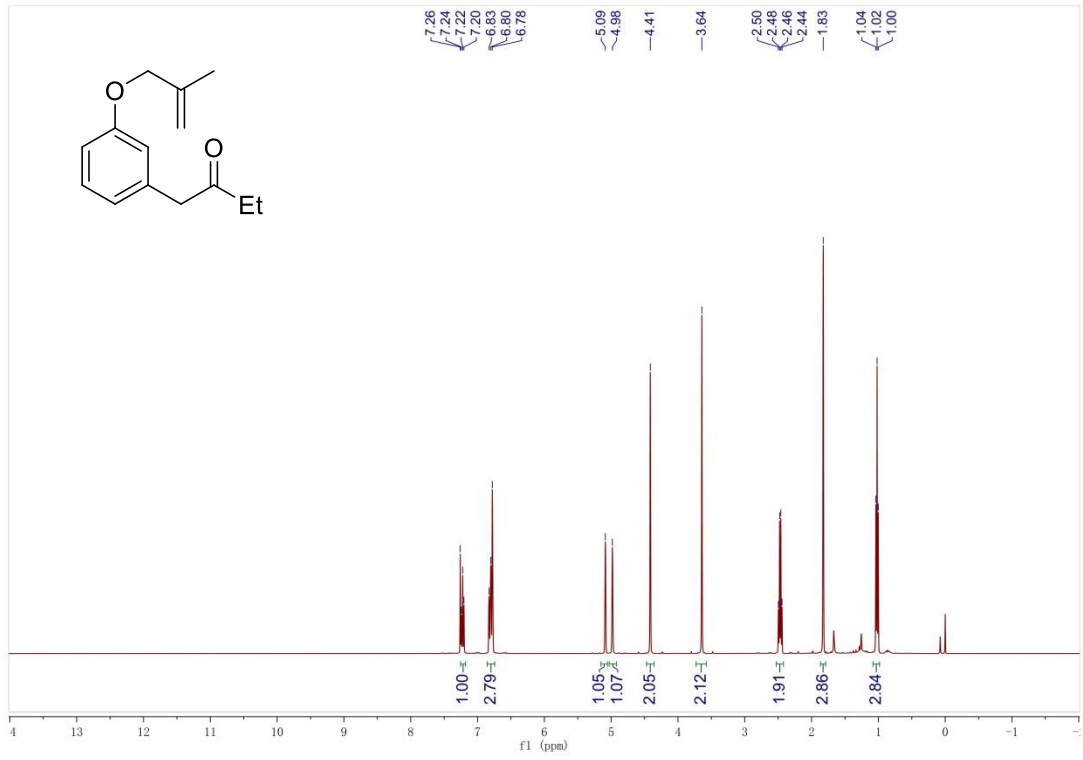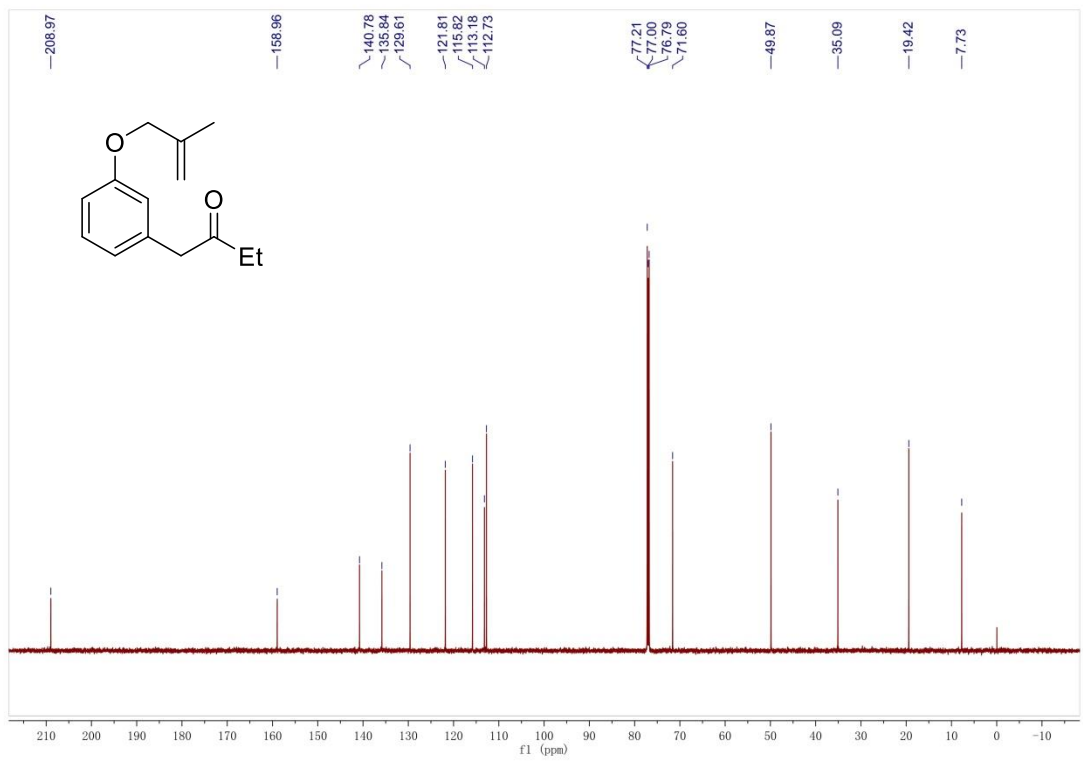

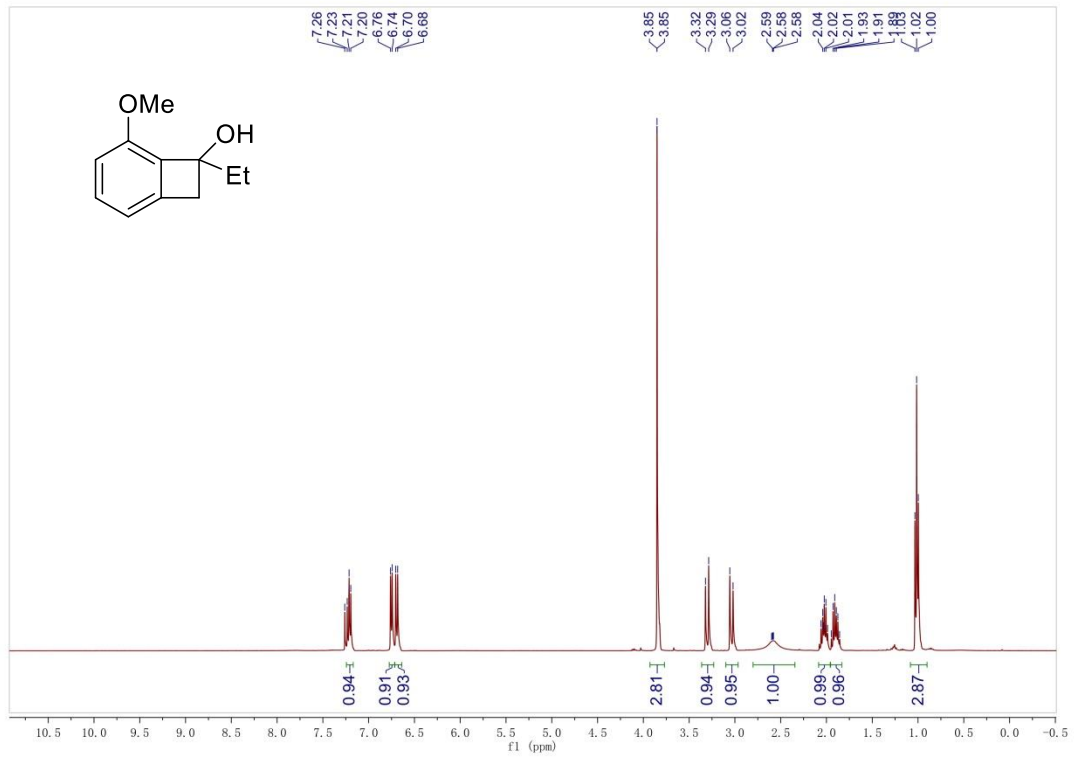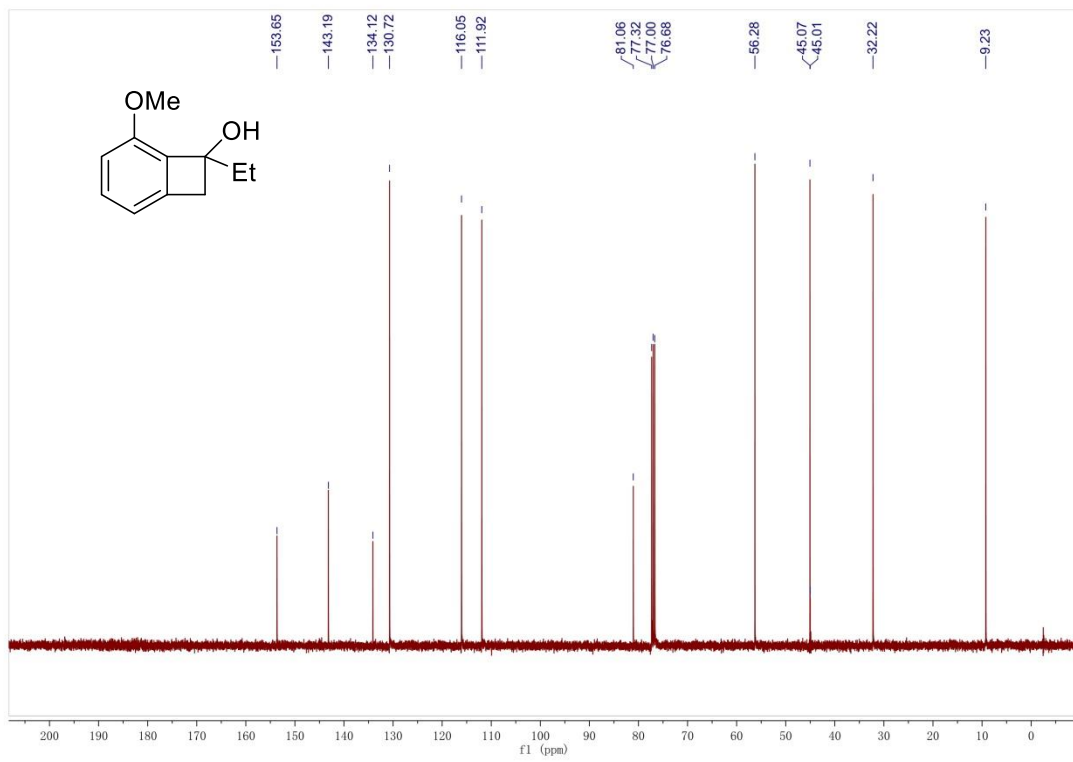

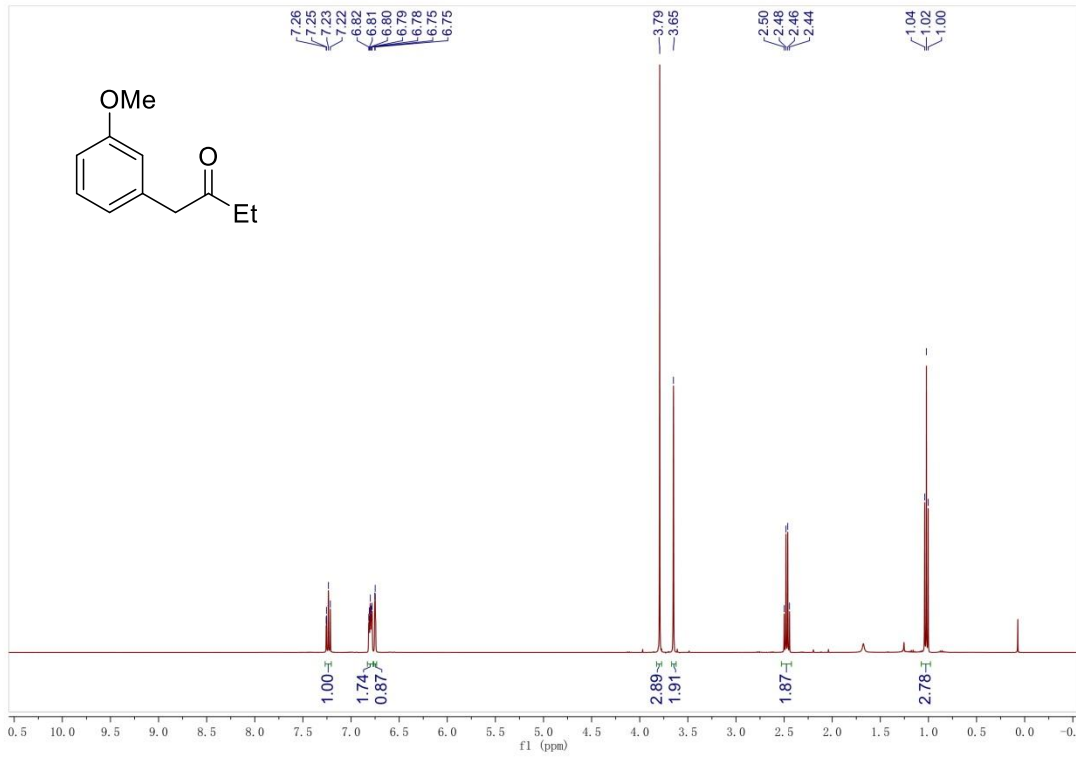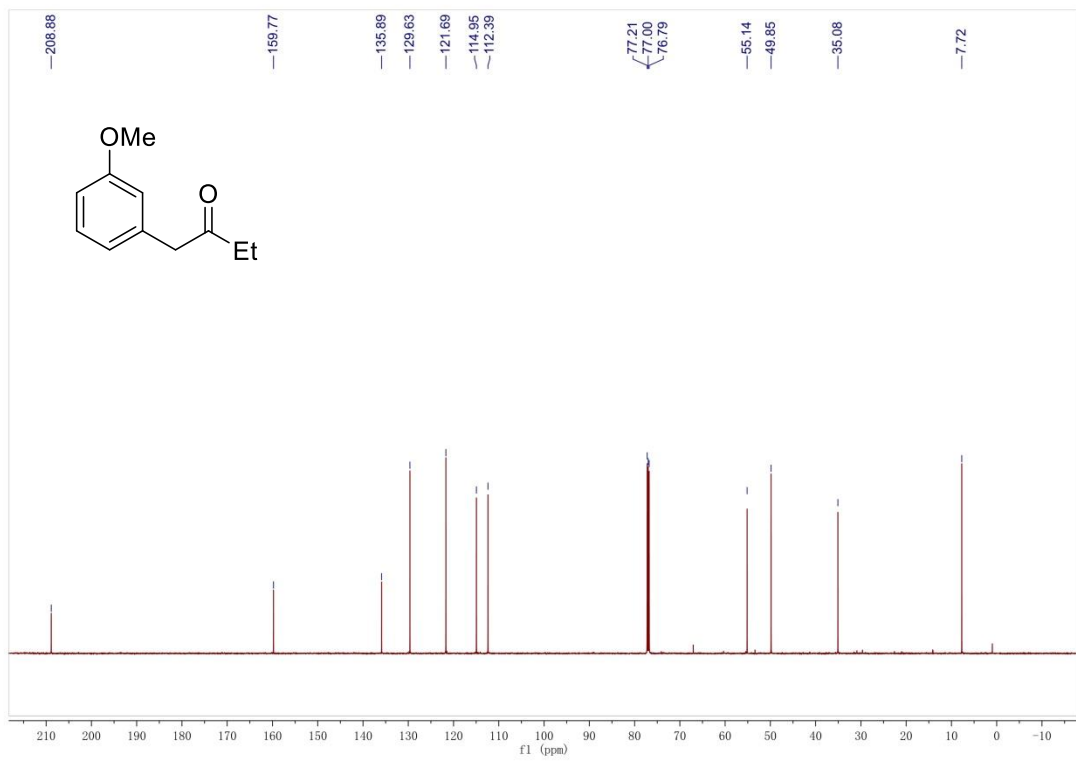

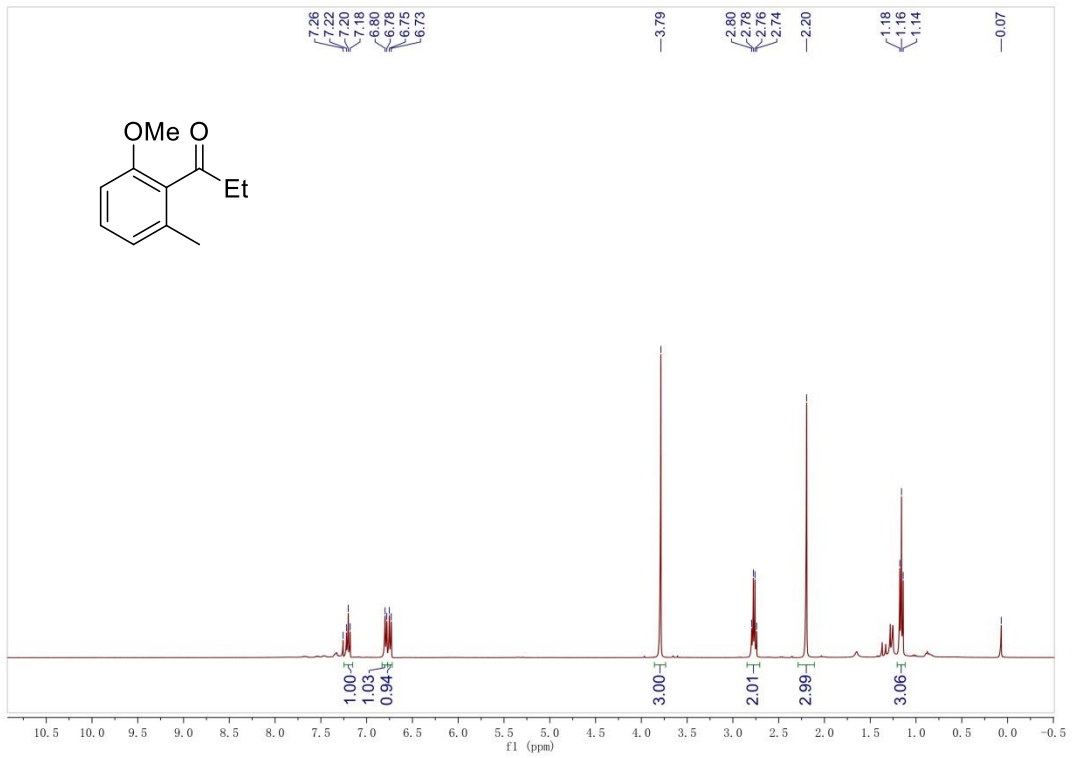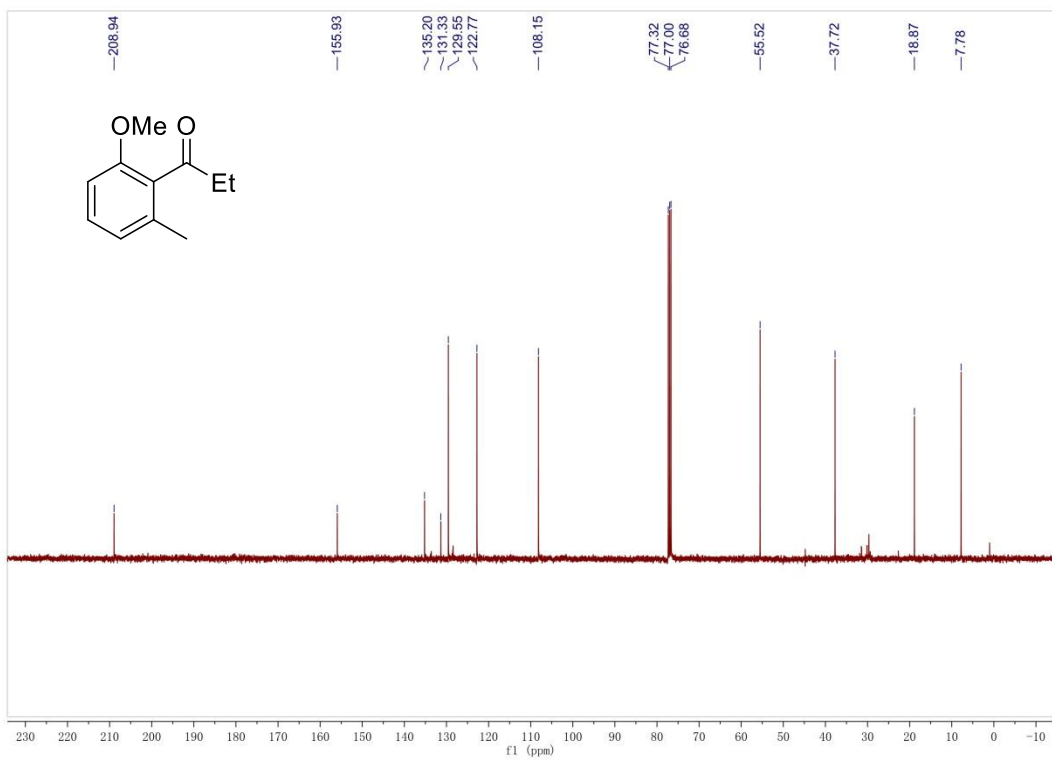

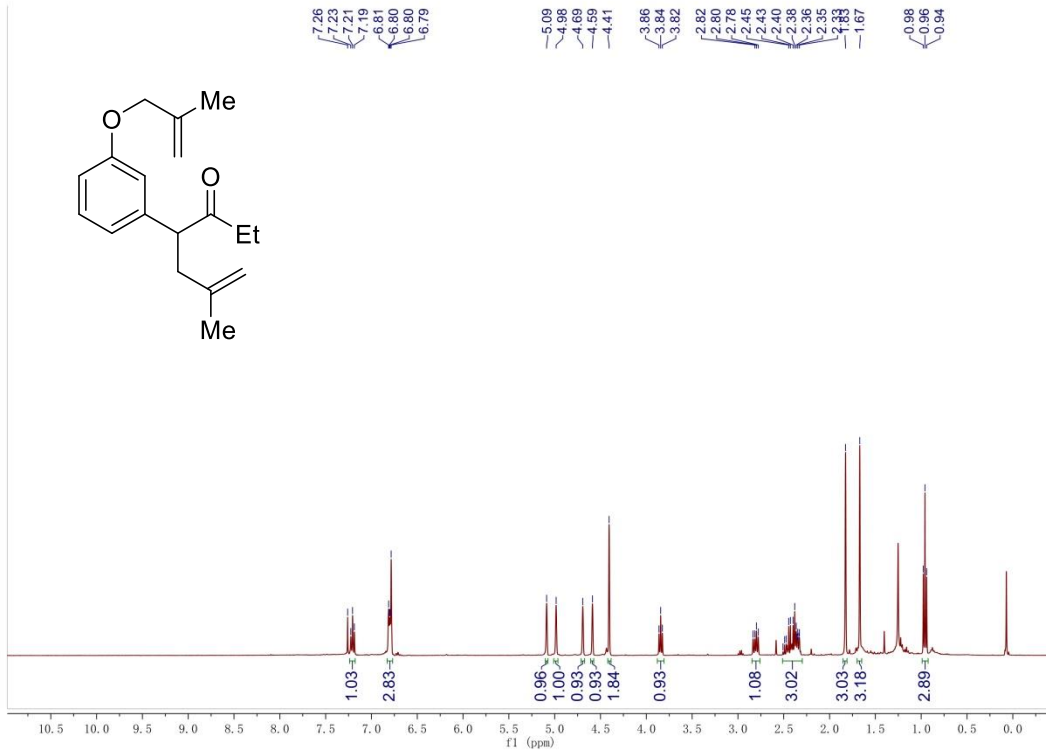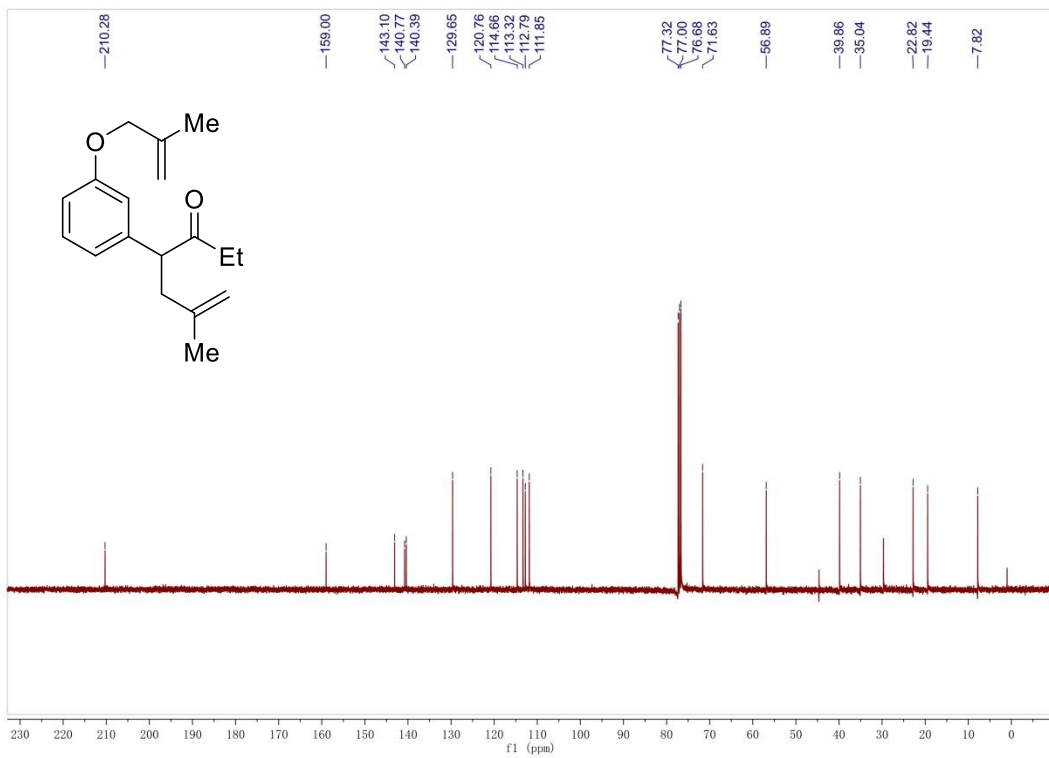



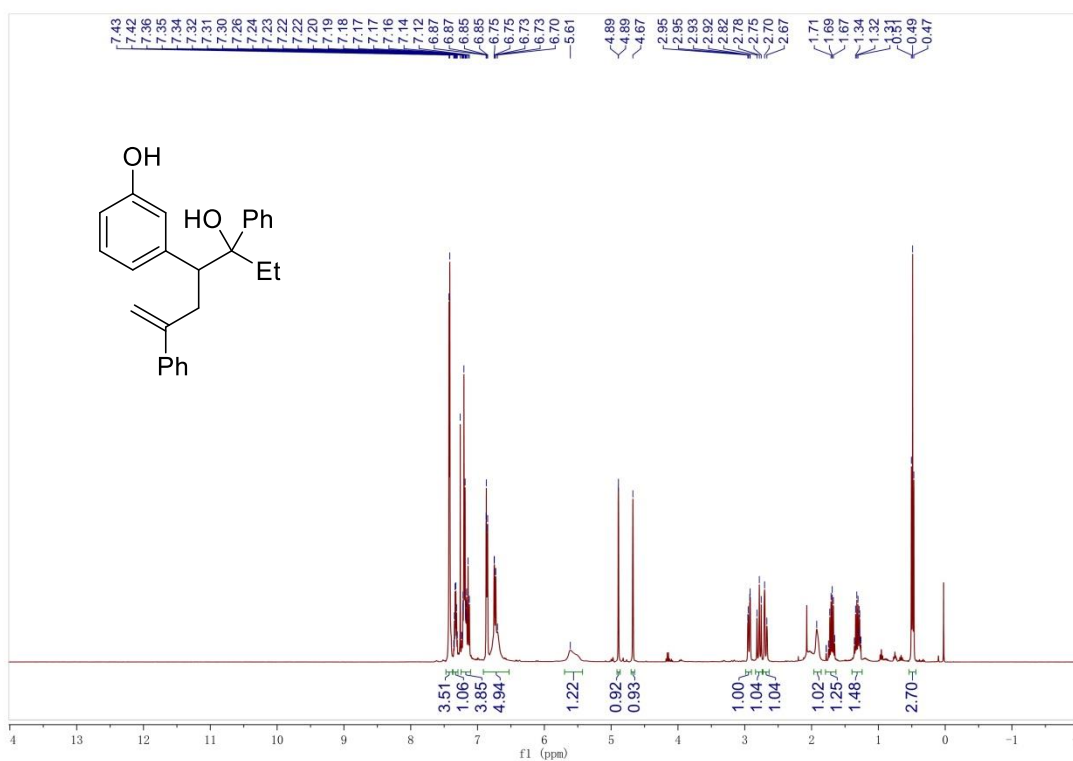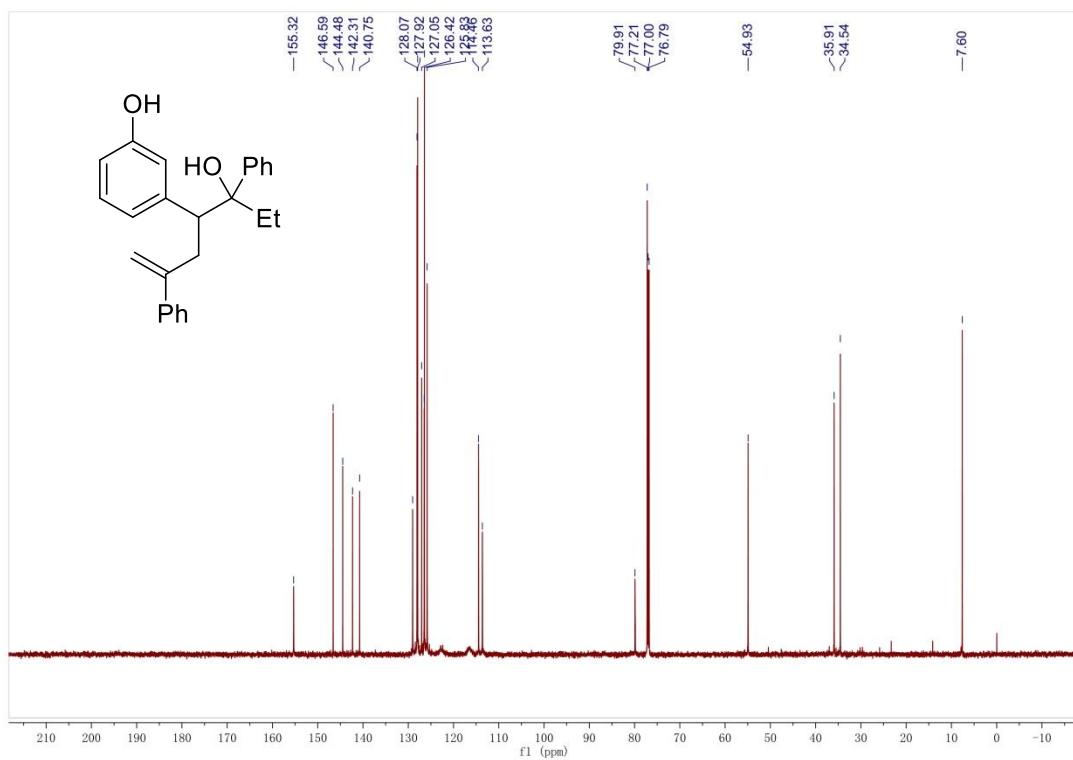

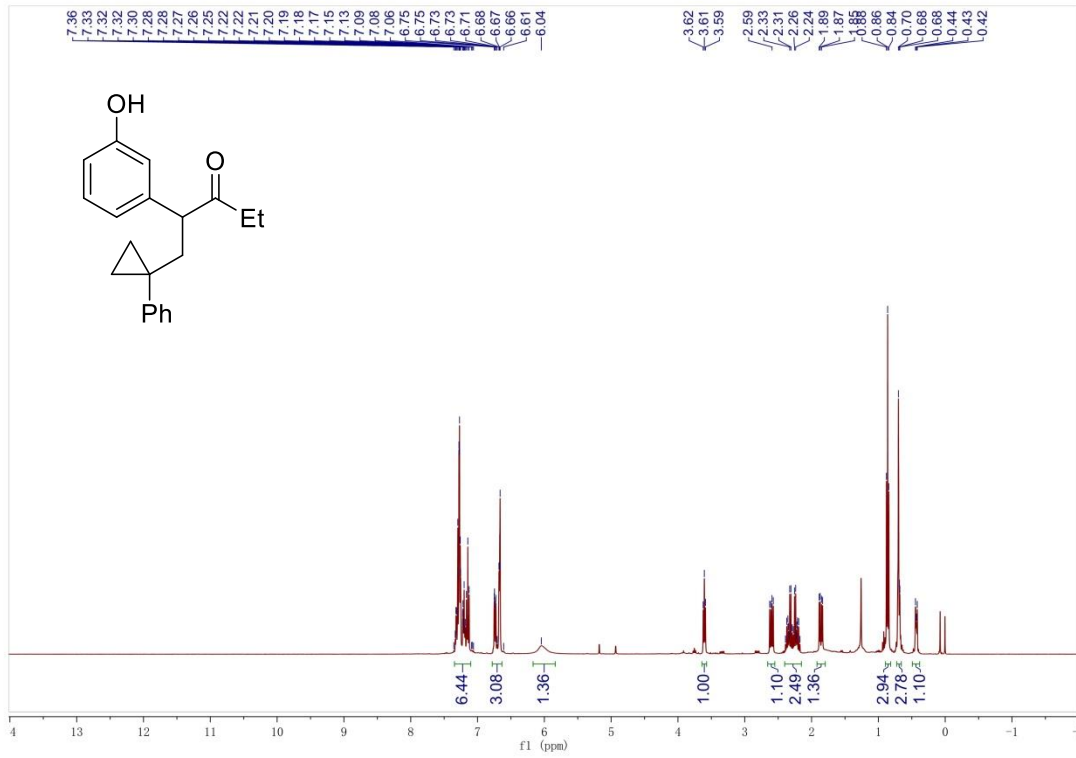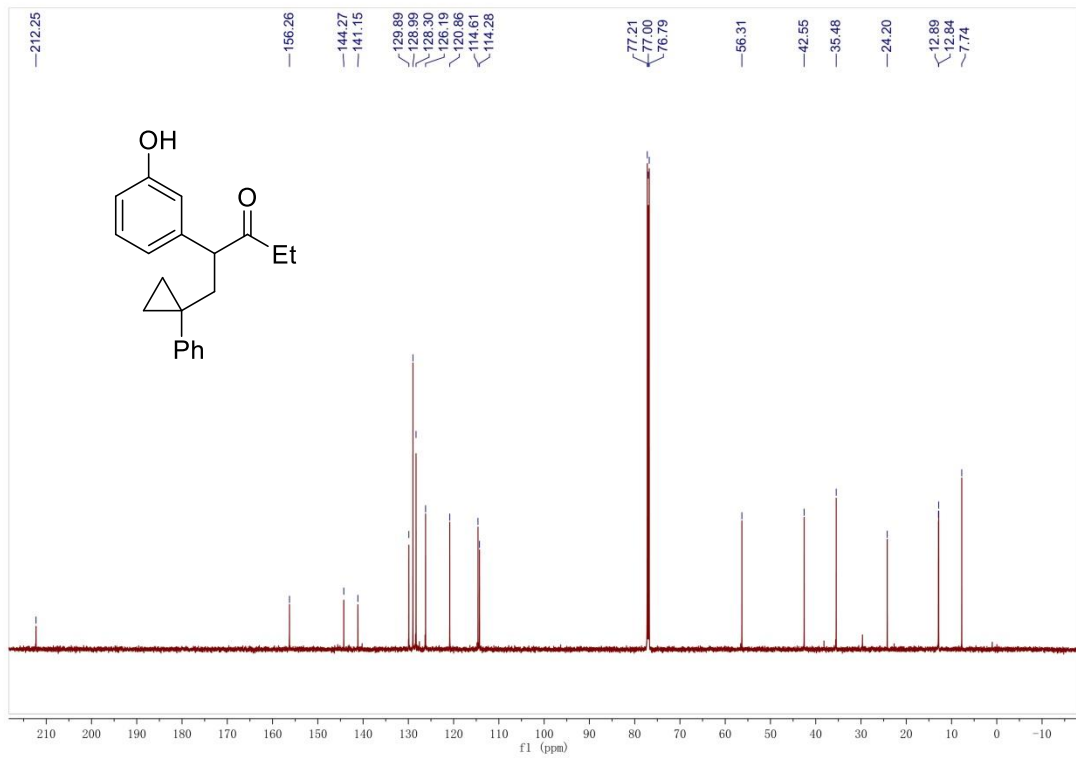

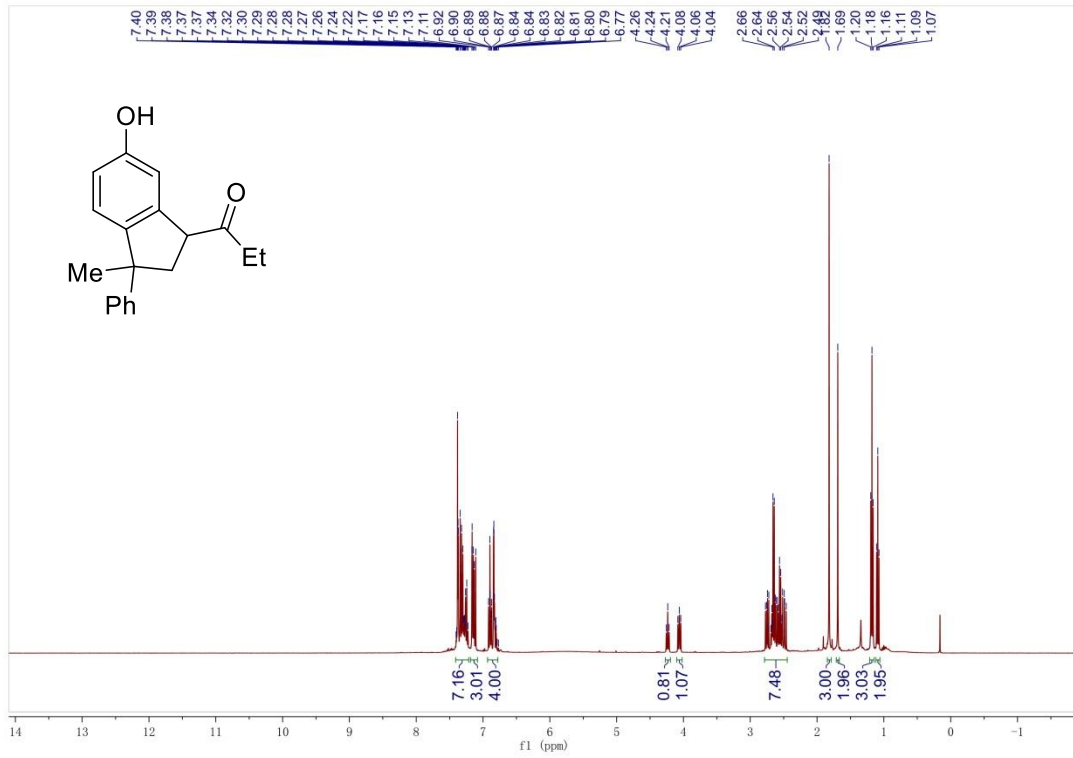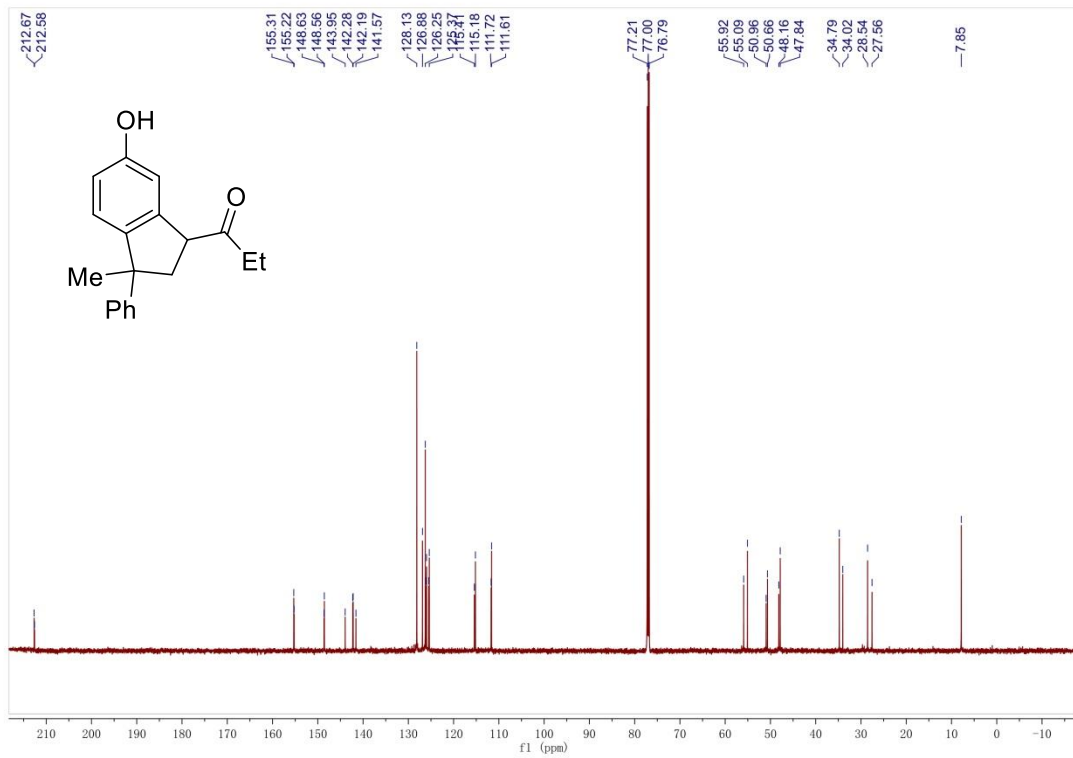

Supplement: d0qo01619e1.pdf [file d0qo01619e1.pdf]
